# Supplementary material for: Managing risk in cancer presentation, detection and referral: a qualitative study of primary care staff views
Source: PubMed Central journal article supplement (PMC4067858; doi:10.1136/bmjopen-2014-004820), 2014-06-12
Supplement: bmjopen-2014-004820.draft_revisions.pdf [file bmjopen-2014-004820.draft_revisions.pdf]

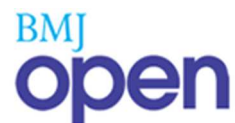

**Complexity, continuity & conflict: a qualitative study of primary care staff views of initiatives to promote cancer early detection and referral**

|                                 |                                                                                                                                                                                                                                          |
|---------------------------------|------------------------------------------------------------------------------------------------------------------------------------------------------------------------------------------------------------------------------------------|
| Journal:                        | <i>BMJ Open</i>                                                                                                                                                                                                                          |
| Manuscript ID:                  | bmjopen-2014-004820                                                                                                                                                                                                                      |
| Article Type:                   | Research                                                                                                                                                                                                                                 |
| Date Submitted by the Author:   | 09-Jan-2014                                                                                                                                                                                                                              |
| Complete List of Authors:       | Cook, Neil; University of Central Lancashire, School of Medicine and Dentistry<br>Thomson, Gillian; University of Central Lancashire, School of Health<br>Dey, Maria; University of Central Lancashire, School of Medicine and Dentistry |
| <b>Primary Subject Heading</b>: | Qualitative research                                                                                                                                                                                                                     |
| Secondary Subject Heading:      | Public health, General practice / Family practice                                                                                                                                                                                        |
| Keywords:                       | QUALITATIVE RESEARCH, PUBLIC HEALTH, Epidemiology < ONCOLOGY                                                                                                                                                                             |
|                                 |                                                                                                                                                                                                                                          |

SCHOLARONE™  
Manuscripts

1  
2  
3  
4  
5  
6  
7  
8  
9  
10 **Complexity, continuity & conflict: a qualitative study of primary care staff views of**  
11 **initiatives to promote cancer early detection and referral**  
12  
13

14  
15  
16  
17 Neil Cook, Research Assistant, School of Medicine and Dentistry, University of Central  
18 Lancashire, Preston, England\*  
19

20  
21  
22  
23 Gillian Thomson, Senior Research Fellow, School of Health, University of Central Lancashire,  
24 Preston, England  
25

26  
27  
28 Paola Dey, Professor of Public Health Epidemiology, School of Medicine and Dentistry,  
29 University of Central Lancashire, Preston, England  
30  
31

32  
33  
34  
35  
36  
37  
38 \*corresponding author: Neil Cook, School of Medicine and Dentistry, Greenbank Building,  
39 University of Central Lancashire, Adelphi Street, Preston, England PR1 2HE  
40

41  
42 Email: [NCook2@uclan.ac.uk](mailto:NCook2@uclan.ac.uk) Phone: 01772 893409  
43  
44

45  
46 **Key Words:** primary health care, general practice, neoplasms, qualitative research, early detection of  
47 cancer.  
48

49  
50  
51  
52  
53 Word count: 3760  
54  
55  
56  
57  
58  
59  
60

## ABSTRACT

### Background

In the UK, there have been a number of national initiatives to promote earlier detection and prompt referral of patients presenting to primary care with signs and symptoms of cancer.

### Objective

To explore the barriers and facilitators, in primary care, to early detection and prompt referral of patients with symptoms suggestive of cancer.

### Design

Qualitative, descriptive interview study.

### Setting

Six practices in North West England.

### Participants

Primary care staff.

### Method

A random sample of primary care practices, stratified by level of previous engagement with early detection and referral initiatives, were invited to take part in individual or group-based interviews. Interviews were audio-recorded and transcribed. A thematic network analysis approach was used with independent coding by two researchers and consensual validation of themes.

### Results

Thirty-nine participants recruited from six practices took part in individual (n=4) or group interviews (n=5). The global theme to emerge from the interviews was that 'managing risk' in primary care was not well understood by those introducing primary care-based cancer initiatives. Three underpinning organising themes were identified: 'complexity', 'continuity' and 'conflict' which reflected issues such as complex symptoms and care systems, patient-led factors and target focused care.

**Conclusion**

To improve the successful implementation of early detection and referral initiatives, practice capacity, complexities related to cancer diagnosis, communication issues associated with the care pathways and conflicting opinions about staff roles need to be addressed.

**ARTICLE SUMMARY****Strengths and limitations of this study**

- The study is, to the best of our knowledge, the first to investigate the attitudes and opinions of primary care staff towards the implementation of cancer early detection and awareness initiatives.
- Findings revealed a number of issues in primary care related to managing risk.
- The sample consisted of individuals from a range of job roles and practices in rural and urban areas.
- The sample was small and drawn from a single area of the country, which may limit the generalisability of findings.

## INTRODUCTION

Two decades of concerted effort to expedite access to proven effective cancer treatments in the UK has led to improvements in cancer survival rates.[1] Primary care has a key role in improving cancer survival through earlier detection and referral of patients with cancer symptoms. National referral guidelines for suspected cancer have been published and there is a national system for urgent referral (two-week waiting-time initiative).[2] However, evidence suggests that there is further room for improvement.[3] There is practice variation in the use of the 'two-week' initiative, and some patients are seen several times in primary care before referral.[4-7] A significant proportion of patients also present through emergency routes and have poorer survival.[5, 8]

To further support primary care, resources were developed and/or disseminated by the Department of Health's National Awareness and Early Diagnosis Initiative (NAEDI), established in 2008, and the Royal College of General Practitioners (RCGP), including: audit and significant events analysis tools,[4, 5] general practitioner (GP) level cancer profile data, safety netting recommendations and referral prompts.

To understand whether and how primary care-based cancer initiatives could be more effective, we need to understand the barriers and facilitators to the promotion of earlier consultation, detection and referral at individual (GP) and organisational (primary care practice) level. Key initiatives have mainly focused on GPs, but other members of the primary care team may have key roles: an area which has been largely unexplored. We report the findings of a qualitative study of the views and experiences of a range of primary care staff in one region of England, which at that time was covered by the Lancashire and South Cumbria Cancer Network (LSCCN). In this paper we focus on the experiences of practice staff in implementing cancer detection and referral initiatives and the perceived barriers and facilitators to earlier consultation, detection and referral of those with symptoms suggestive of cancer.

## METHODS

This was a qualitative descriptive study utilising both individual and group-based interviews. It aimed to recruit staff in six practices with differing levels of engagement (high, medium and low) with cancer early diagnosis initiatives. Information on the level of engagement was collated via the LSCCN at the end of June 2012.

1  
2  
3 High engagers had participated in at least one of the following: RCGP cancer audit, attendance at a  
4 course on early diagnosis or face-to-face meetings to discuss GP cancer profiles and action planning.  
5  
6 Medium engagers had attended at least one regional meeting about cancer awareness. Low  
7  
8 engagers were not known to have engaged in any initiatives.  
9

10 GP practices in LSSCN were stratified into these three groups and a random sample of 10 practices in  
11 each group were sent a letter about the study, followed up with a phone call from the research team  
12 after one week. Practices were offered participation in a practice-based group interview, or  
13 individual interviews if preferred. The aim was to recruit two practices in each stratum. Due to low  
14 uptake, two strata (medium and low engagers) were merged and a random sample of a further 15  
15 practices were sent letters.  
16  
17  
18  
19

20 In practices agreeing to take part, semi-structured, audio-recorded interviews, attended by two  
21 researchers, were undertaken between September and October 2012. All transcribed data were  
22 entered into NVivo 10 and analysed using a Thematic Network Analysis approach.[9] This involved  
23 an iterative and cyclical process of reading and analysis to identify basic, organising and global  
24 themes within the dataset. Analysis was undertaken by two authors (GT and NC) independently on  
25 six transcripts initially followed by an in-depth discussion, and consensual validation of key themes.  
26 A further cycle of independent and collaborative analysis was then undertaken on a further sub-set  
27 of transcripts to ensure rigour and authenticity of the themes generated. All thematic decisions  
28 were discussed with the third author (PD). The study was approved by the University of Central  
29 Lancashire STEM ethics committee and individual written informed consent was obtained from all  
30 participants.  
31  
32  
33  
34  
35  
36  
37  
38  
39  
40

## 41 RESULTS

42 Six practices agreed to participate; three 'high engagers' and three 'low/medium engagers'.  
43 Practices were geographically spread across the region in urban and rural areas. Thirty-nine  
44 participants took part in group (n=5) or individual (n=4) interviews. Job roles included GP (n=9,  
45 23.1%), receptionist (n=7, 17.9%), nurse (n=6, 15.4%), manager (n=6, 15.4%), secretary (n=5, 12.8%),  
46 health care assistant (n=3, 7.7%), medical student (n=2, 5.1%) and phlebotomist (n=1, 2.6%).  
47  
48  
49  
50  
51

52 Overall, practice staff were aware of the two-week waiting-time initiative. There was also good  
53 knowledge about the national 'Be Clear on Cancer' public cancer awareness campaigns, but less  
54 awareness about other initiatives specifically targeted at primary care. The key global theme to  
55 emerge from the interviews related to 'managing risk' within primary care:  
56  
57  
58  
59  
60

1  
2  
3 *"It's quite a tricky, nebulous area [...]. The nature of general practice is that we're dealing*  
4 *every day with uncertainty..."* (Interview 6, Participant 3)  
5  
6  
7

8 A key concern of staff was that policymakers and those implementing cancer initiatives within  
9 primary care did not fully understand how risk was managed within primary care. Cancer was only  
10 one priority within primary care and there was an abundance of initiatives for a variety of conditions  
11 which primary care staff were expected to implement. Three underpinning organising themes (and  
12 associated basic themes) of 'complexity', 'continuity' and 'conflict' reflected the tensions and  
13 difficulties that primary care face in managing risk whilst dealing with complex symptoms and care  
14 systems, patient-led factors and target-focused care. An overview of the organising and basic  
15 themes is presented in figure 1. These themes are described and discussed, contextualised by  
16 participant quotes below.  
17  
18  
19  
20  
21  
22  
23  
24

#### 25 Complexity

26 *Cancer disease and symptoms:* Cancer diagnosis was considered an important priority. However,  
27 whilst some symptoms were straightforwardly associated with cancer, e.g. breast lump, other  
28 symptoms commonly presenting in practice, compared with the relative infrequency of cancer in a  
29 practice population, provided greater challenges:  
30  
31  
32  
33

34 *"How often do we see them [...] most cancers you, sort of, see so infrequently, that it's*  
35 *actually quite difficult to then keep up-to-date with, you know, what you're supposed to be*  
36 *doing and the referral pathways and all that sort of thing, when you might see one or two a*  
37 *year."* (Interview 4, Participant 1)  
38  
39  
40  
41  
42

43 *Fragmentation and access to diagnostic services:* Primary care staff expressed difficulties accessing  
44 diagnostic services due to fragmented systems and multiple agencies. Rigid referral criteria led to  
45 cases being 'bounced back' if they failed to meet these criteria. However, concerns about patients  
46 led many participants to 'fudge', 'embellish' or 'bend-the-rules' to ensure assessment:  
47  
48  
49

50 *"I think, sometimes [...] even though it says on the form, don't fill out this form unless they*  
51 *tick any boxes but you find a box to tick, and usually for very good reason. And I think you'd*  
52 *only go, slightly over egging the presentation if you were pretty sure there was something*  
53 *there, something going on."* (Interview 4, Participant 4)  
54  
55  
56  
57  
58  
59  
60

1  
2  
3 Several participants felt frustrated by restricted access to diagnostics for certain conditions:  
4  
5

6 *"I can send people for a CT scan if I have a concern about them, for some conditions, but not*  
7 *others. Well why not? I'm the one who's initiating the referral in the first place. You trust me*  
8 *to initiate the referral to pick the patient and prepare them so that you can come along and*  
9 *just arrange the scan and look at it."* (Interview 4, Participant 3)  
10  
11  
12

13  
14 Access restrictions were felt to reflect 'empire building' and 'preservation', rather than a 'logical'  
15 service delivery model. Whilst some GPs wanted more direct access to diagnostics, this was not  
16 universal, and others highlighted the need for appropriate 'training'.  
17  
18  
19

20  
21 *Guidelines content and information overload:* Participants referred to the usefulness of guidelines to  
22 help symptom differentiation. Knowledge was felt to be experientially derived; referral guidelines  
23 were considered useful for less experienced doctors. Guidance that expressed the statistical  
24 probabilities that someone had cancer was less preferred to guidance on what symptoms or signs  
25 raise concern or require further investigation:  
26  
27  
28

29  
30 *"I mean, you see, from a GPs point of view, if somebody comes in who is fifty-five years of*  
31 *age, and passes blood in his stool, you need to exclude a cancer. Now, I don't want to know*  
32 *how many, percentage of those people pass blood in the motion will have cancer, or how*  
33 *many will have piles or, inflammatory bowel disease or what have you [...]. Text books don't*  
34 *help you there, NICE guidelines do not help you in that sort of situation."* (Interview 4,  
35  
36  
37  
38  
39 Participant 3)  
40  
41

42 Concerns were expressed about the number of guidelines available for different conditions and  
43 inconsistencies between different sources:  
44  
45

46 *"And that's the problem 'cause last year there was a big campaign, "if you have a cough for*  
47 *more than three weeks you need to go and see a doctor", but NICE guidelines is six weeks,*  
48 *[...] so there is no uniformity."* (Interview 6, Participant 4)  
49  
50  
51  
52

53 Participants described a 'tsunami' of new guidelines, care plans and initiatives inducing guideline  
54 'negativity' and difficulties keeping up-to-date:  
55  
56  
57  
58  
59  
60



1  
2  
3 *“And I thought that’s probably a squamous cell carcinoma. That needs a two-week wait*  
4 *referral. Then, I actually checked the guidelines, the guidelines say that “it’s got to be over*  
5 *one centimetre and you’ve got to wait more than eight weeks really for it to grow” etcetera,*  
6 *etcetera [...] and those things will change on a regular basis. Now, how do you expect an*  
7 *entire network of primary care physicians to stay current with all those guidelines and apply*  
8 *them religiously?” (Interview 2, Participant 3).*  
9  
10  
11  
12

#### 13 14 Continuity

15 *Patient-practice relationships:* Continuity-of-care could not always be achieved in practice, even  
16 though patients preferred it and its absence could contribute to diagnostic delay:  
17  
18

19  
20  
21 *“People have been hopping around from one clinician to another and that, and you [...] don’t*  
22 *see the evolution of the story until [...] it hits you in the face [...]. Patients book on the day,*  
23 *they don’t necessarily get in the person they normally see, they get in with the available, so*  
24 *that can disjoint things....” (Interview 3, Participant 4)*  
25  
26  
27

28  
29 It was felt that smaller, rural practices had closer relationships with patients and their community,  
30 which would lead to earlier consultation. However, others felt awareness of cancer deaths was  
31 heightened in close-knit communities, which could reinforce negative views.  
32  
33

34  
35 *Primary care and secondary care interface:* Expedited assessment following GP referral of patients  
36 through the two-week wait initiative was perceived to work well, but delays following patients’  
37 initial appointment were reported. Some staff worried about the impact on patients:  
38  
39

40  
41  
42 *“And, well, it’s very difficult from our point of view, ‘cause we’re saying, “look, you know this*  
43 *may be nothing serious, however, I want to refer you on the system, you’ll get an*  
44 *appointment in two weeks”, and they do get seen, but then there’s a massive delay, so, you*  
45 *know, then they’re kinda all heightened up because they’re thinking, “{whispered} the doctor*  
46 *thinks I’ve got cancer” and then nothing happens for ages, and it’s really hard for the*  
47 *patients...” (Interview 3, Participant 5)*  
48  
49  
50  
51

52  
53 Delays in hospital communication were also identified:  
54  
55

56 *“You know, a letter takes, takes two or three days or four days to be produced, then you have*  
57  
58  
59  
60

1  
2  
3 *to wait a fortnight for a consultant to sign it, because they're away, then it has to go in the*  
4 *internal post to the next department, then it has to go into the system. I mean you just wait, I*  
5 *mean you just see waits stretch ahead.” (Interview 2, Participant 3)*  
6  
7  
8

9  
10 There were concerns that centralising services negatively affected assessment uptake among low  
11 income patients. In some rural locations, transport was provided, with financial implications:  
12

13  
14 *“I mean, up here, if you haven't got your own transport, you can use the transport service,*  
15 *that again is a cost to the National Health, how much is that costing?” (Interview 2,*  
16 *Participant 2)*  
17  
18  
19

20  
21 *Practice-based follow-up:* Practices were divided on whether they should follow patients up if they  
22 failed to attend for cancer screening; the debate centred on whether the practice or the patient was  
23 responsible:  
24

25  
26  
27 *“When we got these figures out we did bash that around quite a bit[...], and we felt that*  
28 *patients had had quite a lot of letters, quite a lot of information, and it would, certainly for*  
29 *the bowel screening and the breast screening, we felt that they actually made their own*  
30 *decisions.” (Interview 3, Participant 4)*  
31  
32  
33

34  
35 *“Yeah, you can bet your bottom dollar that one of those people who doesn't turn up or*  
36 *refuses to have them done, [...] statistically one of these people, over the following three*  
37 *years is going to develop a bowel cancer, and if they suddenly discover that there was the*  
38 *screening and the doctor was aware that he didn't turn up, he's gonna take legal action,*  
39 *because he'll say the doctor must have an obligation to remind me.” (Interview 4, Participant*  
40 *3)*  
41  
42  
43  
44  
45  
46  
47

48 Conflict

49  
50 *Prevention versus target driven care:* Cancer was considered a public health priority but many  
51 participants considered that there was a tension between preventative approaches and achieving  
52 Quality and Outcomes Framework (QOF) targets:  
53  
54  
55  
56  
57  
58  
59  
60

1  
2  
3 *“There is a real public health disconnect in primary care, how we’re funded, what we do, and*  
4 *we’re not as good as with public health, with local public health initiatives, as maybe we*  
5 *should be necessarily [...]. It’s just time to do things, [...] and those things aren’t required of*  
6 *our core business, and when you have a very detailed contract that tells you what you will be*  
7 *paid for doing...”* (Interview 2, Participant 3)  
8  
9  
10

11  
12 The routine review of patients with long-term conditions had major resource implications for  
13 primary care, particularly small practices. However, others felt that this could present an  
14 opportunity:  
15  
16

17  
18  
19 *“You’ve got the long-term condition nurses who are going into a different clientele to those*  
20 *from the district nurses...”* (Interview 2, Participant 2)  
21  
22

23  
24 Even when QOF focussed on public health issues, there were concerns about the focus on target  
25 attainment. For example, GPs repeatedly asking patients opportunistically if they have attended  
26 screening led to concerns that this may ‘*put patients off*’ coming to see them because they become  
27 ‘*fed up*’ with being asked. Participants also felt they needed to be careful about pushing patients ‘*too*  
28 *hard*’ in case they raised anxiety because they then believed the doctor ‘*knows something*’.  
29  
30  
31

32  
33 *Staff roles:* There were conflicting views around the role of other practice staff in cancer awareness,  
34 in particular with regard to reception staff. Some staff viewed the reception role as a health advisor,  
35 whereas others perceived their role to be purely administrative. Additionally, there were  
36 reservations about the ability of reception staff to provide these messages and how the public might  
37 feel about receiving health information from a member of reception staff:  
38  
39  
40  
41

42  
43 *“You’re passing clinical responsibility to people who are non-clinical. It’s alright for patients*  
44 *to speak to them, and that’s fine, but, I’m not gonna use the receptionists as a source of*  
45 *information [...]. I think anything clinical should be passed to the doctor full stop. I don’t think*  
46 *there is any other role for the receptionist.”* (Interview 4, Participant 3)  
47  
48  
49

50  
51 There were also concerns about potential litigation issues if reception staff were to give advice and  
52 how this could impact on the practice:  
53  
54

55  
56 *“I think it’s also worth mentioning that at this point, because of our roles, how they are, we*  
57 *get a lot of patients not happy about us supplying information, because we’re not allowed to*  
58  
59  
60

1  
2  
3 *diagnose, obviously for obvious reasons, but if you was to imply something, that could come*  
4 *back on us twice as hard because you'd implied something that could be wrong, and*  
5 *therefore it is now your fault."* (Interview 1, Participant 1)  
6  
7  
8

9  
10 A further issue associated with staff roles was the identified benefits of having a chain of  
11 communication between all practice members. For example, receptionists being able to 'raise issues'  
12 with the doctor if they know someone is coming in who has symptoms the doctor should be aware  
13 of but the patient 'may not say anything'. This can also work the other way:  
14

15  
16  
17 *"Patients that I worry about, I will leave messages. I'll mention to reception or mention to*  
18 *people that I want to follow them up."* (Interview 6, Participant 3)  
19  
20  
21

22 Some could see a role for other members of the wider practice team, particularly to support  
23 screening uptake:  
24

25  
26  
27 *"We'd say well who are the district nurses already going out to? You know, maybe they carry*  
28 *packs with them [those] they're regularly going into and it's given by word of mouth. ....you*  
29 *know, you can work with your local pharmacists."* (Interview 2, Participant 2)  
30  
31  
32

33  
34 *Cancer awareness:* Although cancer fear was commonly acknowledged, staff were divided as to  
35 whether patients were afraid to consult the GP with cancer symptoms. Some felt that unhealthy  
36 lifestyle choices contributed to patient reluctance to present with cancer symptoms:  
37

38  
39  
40 *"The cancers where they feel that they may have contributed to it, like smoking, they tend to*  
41 *ignore because they don't want to be told that it may be their fault in a certain way, and they*  
42 *don't want to give up the lifestyle."* (Interview 6, Participant 4)  
43  
44  
45

46  
47 Cancer awareness campaigns were felt to be important, but those who presented to the practice  
48 following the campaign were more likely to be those at least risk:  
49

50  
51  
52 *"It's the people who never come to the doctors that you want to hit, not the people that were*  
53 *already coming in anyway, and they tend to be ones that see those adverts. But then if you*  
54 *can get one person who wouldn't normally come in and you catch them, then... it's better."*  
55  
56 (Interview 5, Participant 1)  
57  
58  
59  
60

1  
2  
3  
4 Campaigns were also felt to create extra work for all practice members. There were complaints that  
5 cancer awareness campaigns tend to run without consideration of other local or national campaigns  
6 which may be running simultaneously:  
7  
8

9  
10  
11 *"It's like it's alright saying putting in place to get them in, but it's the sheer volume, isn't it?*  
12 *You can only cope with so much can't you?"* (Interview 5, Participant 1)  
13  
14

## 15 16 17 **DISCUSSION**

18 To the best of our knowledge, this is the first study which has qualitatively explored the attitudes  
19 and opinions of a range of primary care staff about early consultation, detection and referral  
20 initiatives to reduce cancer diagnostic delay. The core theme identified by the study was that of the  
21 tensions and difficulties in managing risk in primary care.  
22  
23

24 The study was small, descriptive and exploratory. However, it covered a diverse geographical area  
25 and practices with varying levels of engagement with awareness and early detection initiatives.  
26 Furthermore, although exploratory, the findings highlight key issues for cancer diagnosis in primary  
27 care, which warrant further investigation and consideration and which can be used to develop  
28 theoretical perspectives for larger studies.  
29  
30

31 Diagnosing cancer in primary care is difficult. Diagnostic errors in cancer are frequent and primary  
32 care malpractice claims common.[10] To support practitioners, national referral guidelines have  
33 been published.[2] There is limited evidence to suggest that these have, in part, contributed to  
34 diagnostic delay reduction in the UK.[3] There is also increasing interest in risk assessment tools, to  
35 aid decision-making, with algorithms and probabilities of risk based on demographic characteristics,  
36 lifestyle factors, symptoms and/or attendance frequency.[11] Some have been disseminated  
37 nationally, with limited evidence of effectiveness.[12] A number of practitioners in our study felt  
38 these aids introduced rules which failed to encapsulate practitioners' tacit concerns about patients.  
39 Previous work in primary care decision-making emphasised the analytical over intuition, but recent  
40 work, including in cancer diagnosis, suggests the experiential knowledge may have a role and may be  
41 more responsive to individual patients.[13-16] Further research into general practitioner's diagnostic  
42 reasoning in cancer is warranted with particular emphasis on the relationship between analytical  
43 and tacit approaches and the implications for further development of risk assessment tools in  
44 routine practice.  
45  
46  
47  
48  
49  
50  
51  
52  
53  
54  
55  
56  
57  
58  
59  
60

1  
2  
3 Practice staff highlighted that patient-doctor relationships were increasingly being eroded,  
4 particularly in large practices. Others suggest that fragmentation of primary care and shorter  
5 consultation times has led to a lack of continuity-of-care, which may hinder early diagnosis as cancer  
6 presentation can be complex in those with multiple co-morbidities.[4, 17, 18] A recent analysis of  
7 significant event audits in lung cancer highlighted how cancer can mimic other diagnoses and have  
8 atypical presentation.[4] Other practice team members may be in contact with the patients more  
9 regularly. Nurses undertaking regular review of patients with long-term conditions could raise  
10 symptom awareness or be more alert to changes in, or new, symptoms suggestive of cancer.  
11 Receptionists could act as navigators directing patients with symptoms to see the GP.[19] Low levels  
12 of knowledge about some cancer symptoms has been demonstrated in non-medical staff and  
13 training needs should be addressed.[20] However, this study highlighted that professional  
14 boundaries and concerns about litigation could impede such whole-system working. Research  
15 within primary care suggests that facilitation of communities of practice and interdisciplinary  
16 knowledge sharing may reduce some of these barriers.[21]

17  
18  
19  
20  
21  
22  
23  
24  
25  
26 Our findings also suggest that the primary/secondary care interface needs strengthening; an  
27 observation supported by others who highlighted the role of poor communication between primary  
28 and secondary care in diagnostic delay.[4] While there was almost universal support for the two-  
29 week waiting-time initiative, concerns were expressed about patient delays after their first  
30 assessment and the time taken for patient information to be sent back to the practice. Practice staff  
31 felt it was difficult to support patients during this time and that they could be lost to the system,  
32 particularly when hospital services were fragmented. For some, increasing direct access to  
33 diagnostic services from primary care was seen as a key mechanism for reducing some of these  
34 delays and supporting early referral, but the need for training in referral criteria was also  
35 highlighted.

36  
37  
38  
39  
40  
41  
42  
43  
44 For there to be greater success, initiatives aimed at primary care need to take into account GP  
45 practice workload and organisation. A 'one-size-fits-all' approach is unlikely to succeed as  
46 practitioners expressed a range of views and opinions on the benefits of different initiatives.  
47 Practices vary in size, population demography, community interactions, organisation and staff  
48 expectations, which can affect their capacity to enact different initiatives and/or whether their  
49 patients can access services. Lack of implementation of initiatives in primary care is not always  
50 because of resistance to the initiatives themselves, but sometimes because of the sheer number of  
51 initiatives across a range of priority areas that practices are expected to implement, often  
52 simultaneously. Policymakers should consider more carefully how new initiatives in cancer early  
53  
54  
55  
56  
57  
58  
59  
60

1  
2  
3 detection impact on primary care, how these can be embedded into practice systems and emphasise  
4 and exploit synergies with other disease conditions. On the other hand, they also need to consider  
5 the impact of primary care policies, designed to benefit other patient groups, on the earlier  
6 consultation and referral of patients with signs and symptoms of cancer. A greater appreciation and  
7 understanding of these issues by commissioners and policymakers could lead to greater gains in  
8 cancer survival.  
9  
10  
11  
12

13  
14  
15  
16 **ACKNOWLEDGEMENTS:** Our thanks to the practices who participated in this study and to the staff  
17 of the Lancashire and South Cumbria Cancer Network who assisted us.

18  
19 **COMPETING INTERESTS:** PD was public health lead for LSCCN and NC is part-funded by a grant from  
20 LSCCN.  
21

22 **FUNDING:** This work was supported by Lancashire and South Cumbria Cancer Network (LSCCN) as  
23 part of the National Cancer Awareness and Early Detection initiative (NAEDI) funding ‘cancer  
24 networks supporting primary care’.  
25

#### 26 **CONTRIBUTIONS:**

27  
28 NC recruited participants, carried out interviews, transcribed the interviews, coded the transcripts,  
29 contributed to the development of the coding framework, and contributed to the writing of the  
30 manuscript.  
31

32  
33 GT carried out interviews, coded the transcripts, contributed to the development of the coding  
34 framework and contributed to the writing of the manuscript .  
35

36  
37 PD designed the study, collated practice engagement data, contributed to the development of the  
38 coding of the framework and contributed to the writing of the manuscript.  
39

40 **DATA SHARING:** No further data are available  
41

#### 42 **REFERENCES**

- 43  
44  
45 1. Coleman MP, Foreman D, Bryant H, et al. Cancer survival in Australia, Canada, Denmark, Norway,  
46 Sweden, and the UK, 1995—2007 (the International Cancer Benchmarking Partnership): an analysis  
47 of population-based cancer registry data. *The Lancet*. 2011;**377**:127–38. doi:10.1016/S0140-  
48 6736(10)62231-3.  
49  
50 2. National Institute for Clinical Excellence. Clinical Guideline 27. Referral guidelines for suspected  
51 cancer. 2005. <http://www.nice.org.uk/nicemedia/live/10968/29814/29814.pdf> accessed 3/1/2014.  
52  
53 3. Neal RD, Din NU, Hamilton W, et al. Comparison of cancer diagnostic intervals before and after  
54 implementation of NICE guidelines: analysis of data from the UK General Practice Research  
55 Database. *Br J Cancer*. 2013. Published online first: Dec 24. doi:10.1038/bjc.2013.791.  
56  
57  
58  
59  
60

- 1  
2  
3 4. Mitchell ED, Rubin G, McLeod U. Understanding diagnosis of lung cancer in primary care:  
4 qualitative synthesis of significant event audit reports. *Br J Gen Pract.* 2013;**63**(606):e37-46. doi:  
5 10.3399/bjgp13X660760.  
6
- 7  
8 5. Royal College of General Practitioners. Clinical Innovation and Research Centre. National Audit of  
9 Cancer Diagnosis in Primary Care. 2011.  
10 [http://www.rcgp.org.uk/news/2011/november/~media/Files/News/National\\_Audit\\_of\\_Cancer\\_Diagnosis\\_in\\_Primary-Care.ashx](http://www.rcgp.org.uk/news/2011/november/~media/Files/News/National_Audit_of_Cancer_Diagnosis_in_Primary-Care.ashx). last accessed 03/01/2014.  
11  
12
- 13 6. Lyratzopoulos G, Neal RD, Barbiere JM, et al. Variation in number of general practitioner  
14 consultations before hospital referral for cancer: findings from the 2010 National Cancer Patient  
15 Experience Survey in England. *Lancet Oncol.* 2012;**13**(4):353-65. doi:10.1016/S1470-2045(12)70041-  
16 4.  
17
- 18  
19 7. Meechan D, Gildea C, Hollingworth L, et al. Variation in use of the 2-week referral pathway for  
20 suspected cancer: A cross-sectional analysis. *Br J Gen Pract.* 2012; 62(602): e590–97.  
21 doi:10.3399/bjgp12X654551.  
22
- 23 8. Ellis-Brookes L, McPhail S, Ives A, et al. Routes to diagnosis for cancer - determining the patient  
24 journey using multiple routine data sets. *Br J Cancer.* 2012;**107**(8):1220-26.  
25 doi:10.1038/bjc.2012.408.  
26
- 27 9. Attride-Stirling J. Thematic networks: an analytic tool for qualitative research. *Qualitative*  
28 *Research.* 2001;**1**(3):385-405. doi:10.1177/146879410100100307.  
29
- 30 10. Wallace E, Lowry J, Smith SM, et al.. The epidemiology of malpractice claims in primary care: a  
31 systematic review. *BMJ Open.* 2013;**3**:e002929. doi:10.1136/bmjopen-2013-002929.  
32
- 33 11. Emery J. Editorial: Assessment of cancer risk in men and women. *Br J Gen Pract.* 2013;**63**(606):4-  
34 5. doi: 10.3399/bjgp13X660607. doi:[10.3399/bjgp13X660607](https://doi.org/10.3399/bjgp13X660607).  
35
- 36 12. Hamilton W, Green T, Martins T, et al. Evaluation of risk assessment tools for suspected cancer in  
37 general practice: a cohort study. *Br J Gen Pract.* 2013;**63**(606):e30-36. doi: 10.3399/bjgp13X660751.  
38
- 39 13. Johansen ML, Holtedahl KA, Rudebeck CE. How does the thought of cancer arise in a general  
40 practice consultation? Interviews with GPs. *Scand J Prim Health Care.* 2012;**30**(3):135-40.  
41 doi:10.3109/02813432.2012.688701.  
42
- 43 14. André M, Andén A, Borgquist L, et al. GPs' decision-making-perceiving the patient as a person or  
44 a disease. *BMC Fam Pract.* 2012;**13**:38. doi:10.1186/1471-2296-13-38.  
45
- 46 15. Stolper E, Van de Wiel M, Van Royen P, et al. Gut feelings as a third track in general practitioners'  
47 diagnostic reasoning. *J Gen Intern Med.* 2011;**26**(2):197-203. doi:10.1007/s11606-010-1524-5.  
48
- 49 16. Zwolsman S, te Pas E, Hooft L, et al. Barriers to GPs' use of evidence-based medicine: a  
50 systematic review. *Br J Gen Pract.* 2012;**62**(600):e511-21. doi: 10.3399/bjgp12X652382.  
51
- 52 17. Brindle L, Pope C, Corner J, et al. Eliciting symptoms interpreted as normal by patients with early  
53 lung cancer. *BMJ Open.* 2012;**2**:e001977. doi:10.1136/bmjopen-2012-001977.  
54  
55  
56  
57  
58  
59  
60



1  
2  
3 18. Round T, Steed L, Shankleman J et al. Primary care delays in diagnosing cancer: what is causing  
4 them and what can we do about them? *J R Soc Med*. 2013;**106**(11):437-40.  
5 doi:10.1177/0141076813504744.  
6

7 19. Dohan D, Schrag D. Using navigators to improve care of underserved patients. *Cancer*.  
8 2005;**104**:848-55. doi:10.1002/cncr.21214.  
9

10 20. Cook N, Hart A, Nuttall K, et al. A telephone survey of cancer awareness among frontline staff:  
11 informing training needs. *Br J Cancer*. 2011;**105**(3):340-45. doi:10.1038/bjc.  
12

13 21. Kislov R, Walshe K, Harvey G. Managing boundaries in primary care service improvement: a  
14 developmental approach to communities of practice. *Implement Sci*. 2012;**7**:97. doi:10.1186/1748-  
15 5908-7-97.  
16  
17  
18  
19  
20  
21  
22  
23  
24  
25  
26  
27  
28  
29  
30  
31  
32  
33  
34  
35  
36  
37  
38  
39  
40  
41  
42  
43  
44  
45  
46  
47  
48  
49  
50  
51  
52  
53  
54  
55  
56  
57  
58  
59  
60

For peer review only

1  
2  
3  
4  
5  
6  
7  
8  
9  
10  
11  
12  
13  
14  
15  
16  
17  
18  
19  
20  
21  
22  
23  
24  
25  
26  
27  
28  
29  
30  
31  
32  
33  
34  
35  
36  
37  
38  
39  
40  
41  
42  
43  
44  
45  
46  
47  
48  
49  
50  
51  
52  
53  
54  
55  
56  
57  
58  
59  
60

**Figure 1: organising themes of complexity, continuity and conflict with their associated basic themes, centred around the global theme of managing risk in primary care**

For peer review only

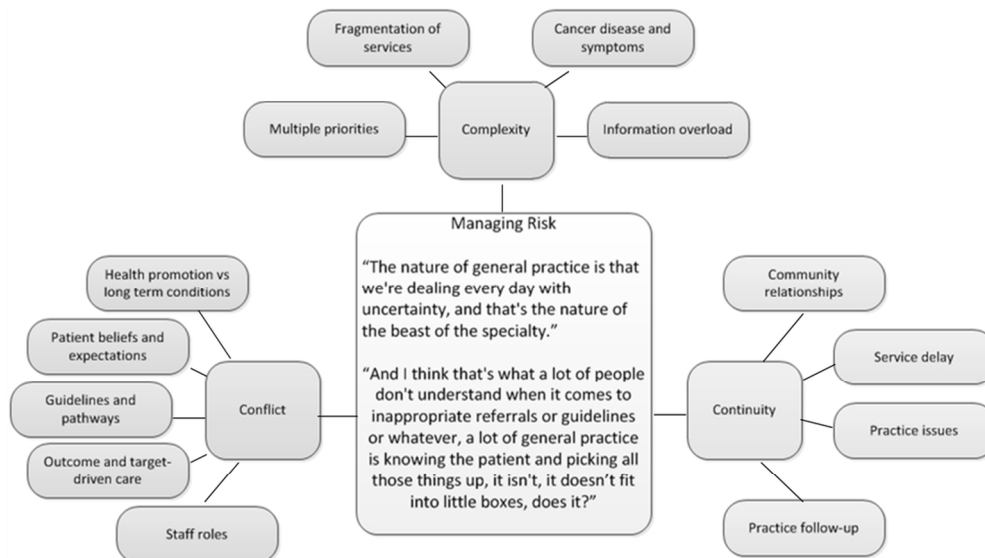

Figure 1: organising themes of complexity, continuity and conflict with their associated basic themes, centred around the global theme of managing risk in primary care

97x54mm (300 x 300 DPI)

Review only

# BMJ Open

## Managing risk in cancer presentation, detection and referral: a qualitative study of primary care staff views

|                                 |                                                                                                                                                                                                                                          |
|---------------------------------|------------------------------------------------------------------------------------------------------------------------------------------------------------------------------------------------------------------------------------------|
| Journal:                        | <i>BMJ Open</i>                                                                                                                                                                                                                          |
| Manuscript ID:                  | bmjopen-2014-004820.R1                                                                                                                                                                                                                   |
| Article Type:                   | Research                                                                                                                                                                                                                                 |
| Date Submitted by the Author:   | 16-Apr-2014                                                                                                                                                                                                                              |
| Complete List of Authors:       | Cook, Neil; University of Central Lancashire, School of Medicine and Dentistry<br>Thomson, Gillian; University of Central Lancashire, School of Health<br>Dey, Maria; University of Central Lancashire, School of Medicine and Dentistry |
| <b>Primary Subject Heading</b>: | Qualitative research                                                                                                                                                                                                                     |
| Secondary Subject Heading:      | Public health, General practice / Family practice                                                                                                                                                                                        |
| Keywords:                       | QUALITATIVE RESEARCH, PUBLIC HEALTH, Epidemiology < ONCOLOGY                                                                                                                                                                             |
|                                 |                                                                                                                                                                                                                                          |

SCHOLARONE™  
Manuscripts

Peer review only

1  
2  
3  
4  
5  
6  
7  
8  
9  
10  
11  
12  
13  
14  
15  
16  
17  
18  
19  
20  
21  
22  
23  
24  
25  
26  
27  
28  
29  
30  
31  
32  
33  
34  
35  
36  
37  
38  
39  
40  
41  
42  
43  
44  
45  
46  
47  
48  
49  
50  
51  
52  
53  
54  
55  
56  
57  
58  
59  
60

Managing risk in cancer presentation, detection and referral: a qualitative study of primary care staff views

Neil Cook, Research Assistant, School of Medicine and Dentistry, University of Central Lancashire, Preston, England\*

Gillian Thomson, Senior Research Fellow, School of Health, University of Central Lancashire, Preston, England

Paola Dey, Professor of Public Health Epidemiology, School of Medicine and Dentistry, University of Central Lancashire, Preston, England

\*corresponding author: Neil Cook, School of Medicine and Dentistry, Greenbank Building, University of Central Lancashire, Adelphi Street, Preston, England PR1 2HE  
Email: [NCook2@uclan.ac.uk](mailto:NCook2@uclan.ac.uk) Phone: 01772 893409

**Key Words:** primary health care, general practice, neoplasms, qualitative research, early detection of cancer.

Word count: abstract- 232, manuscript - 4,504

**ABSTRACT**

Objectives: In the UK, there have been a number of national initiatives to promote earlier detection and prompt referral of patients presenting to primary care with signs and symptoms of cancer. The aim of the study was to explore the experiences of a range of primary care staff in promoting earlier presentation, detection and referral of patients with symptoms suggestive of cancer.

Setting: Six primary care practices in North West England.

Participants: Thirty-nine primary care staff from a variety of disciplines took part in five group and four individual interviews.

Results: The global theme to emerge from the interviews was ‘managing risk’, which had three underpinning organising themes: ‘complexity’, relating to uncertainty of cancer diagnoses, service fragmentation and plethora of guidelines; ‘continuity’, relating to relationships between practice staff and their patients and between primary and secondary care; ‘conflict’ relating to policy drivers and staff role boundaries. A key concern of staff was that policymakers and those implementing cancer initiatives did not fully understand how risk was managed within primary care.

Conclusion: Primary care staff expressed a range of views and opinions on the benefits of cancer initiatives. National initiatives did not appear to wholly resolve issues in managing risk for all practitioners. Staff were concerned about the number of guidelines and priorities

1  
2  
3 they were expected to implement. These issues need to be considered by policymakers when  
4  
5 developing and implementing new initiatives.  
6  
7

## 8 9 **ARTICLE SUMMARY**

### 10 11 12 13 **Strengths and limitations of this study**

- 14  
15  
16 • The study investigates the experiences of a range of primary care staff around  
17  
18 implementing initiatives for the earlier diagnosis of cancer.
- 19  
20  
21 • The underlying concern in primary care is related to managing risk.
- 22  
23  
24 • The sample included a mix of practices with different practice characteristics and  
25  
26 included those known to be engaged in national and regional initiatives and those who  
27  
28 were less engaged.
- 29  
30  
31 • The sample was drawn from a single English region.
- 32  
33  
34  
35  
36  
37  
38  
39  
40  
41  
42  
43  
44  
45  
46  
47  
48  
49  
50  
51  
52  
53  
54  
55  
56  
57  
58  
59  
60

## INTRODUCTION

Studies in the 1990s showed that UK cancer survival rates were worse than many other European countries, following which there has been two decades of concerted effort to expedite access to proven effective cancer treatments.[1] While there have been improvements in cancer survival latterly, the UK still lags behind many other countries with similar health care systems, which may be partly due to later stage of disease at presentation. [2]

Both nationally and internationally, primary care is seen to have a key role in improving cancer survival by reducing delays in diagnosis through promoting earlier presentation and through earlier detection and referral of those with symptoms for further specialist assessment.[3, 4] In the UK, national campaigns extol those with symptoms to see their general practitioner earlier; there are national referral guidelines for suspected cancer and a national system for urgent referral from primary to secondary care (two-week waiting-time initiative).[5] However, evidence suggests that there may be further room for improvement:[6] there is practice variation in the use of the 'two-week' initiative and some patients are seen several times in primary care before referral.[7-9] A significant proportion of patients also present through emergency routes and have poorer survival.[10]

To further support primary care in the UK, resources were developed and/or disseminated by the Department of Health's National Awareness and Early Diagnosis Initiative (NAEDI), established in 2008, and the Royal College of General Practitioners (RCGP) including: audit and significant events analysis tools,[7, 8] general practitioner (GP) level cancer profile data, safety netting recommendations and risk assessment tools.[11] Key initiatives have mainly



1  
2  
3 focused on GPs, but other members of the primary care team may have key roles: an area  
4  
5 which has been largely unexplored.  
6  
7  
8

9  
10 A number of international studies have been undertaken in attempts to understand the reasons  
11 behind delay in cancer diagnosis. Qualitative studies have mostly focussed on patient  
12 perspectives.[12-14] Only a few have explored primary care experiences and these have been  
13 mainly limited to decision-making processes or referral pathways [11, 15, 16] and from the  
14 perspective of the general practitioner. [3, 11, 15,16] In order to understand how a range of  
15 initiatives across the patient pathway in primary care could be more effective and the role of  
16 other members of the practice team, we explored the experiences of a range of primary care  
17 staff in supporting earlier presentation, detection and referral of those with symptoms  
18 suggestive of cancer. The study was undertaken in one region of England, which at that time  
19 was covered by the Lancashire and South Cumbria Cancer Network (LSSCN).  
20  
21  
22  
23  
24  
25  
26  
27  
28  
29  
30  
31  
32  
33  
34  
35

## 36 **METHODS**

37  
38  
39  
40 This was a qualitative descriptive study utilising both individual and group-based interviews.  
41  
42 It aimed to recruit staff from six practices who were differentially engaged with the national  
43 awareness and early diagnosis of cancer agenda. GP practices within LSSCN were stratified  
44 into one of three groups at the end of June 2012. High engagers had participated in at least  
45 one of the following: RCGP cancer audit, attendance at a course on early diagnosis or face-  
46 to-face meetings to discuss GP cancer profiles and action planning. Medium engagers had  
47 attended at least one regional meeting about cancer awareness. Low engagers were not  
48  
49  
50  
51  
52  
53  
54  
55  
56  
57  
58  
59  
60

1  
2  
3 known to have engaged in any initiatives. Of 254 practices in the geographical area, there  
4  
5 were 51 high engagers, 69 medium engagers and 134 low engagers.  
6  
7

8  
9  
10 Within each group, a random sample of 10 practices were sent a letter about the study,  
11  
12 followed up with a phone call from the research team one week later. The initial aim was to  
13  
14 recruit at least two practices in each stratum. Due to low uptake within the medium and low  
15  
16 engager strata, these categories were merged and a random sample of a further 15 practices  
17  
18 sent letters. Practices were offered a choice of either group or individual interviews as it was  
19  
20 recognised that time constraints prevent some practice staff from taking part in group  
21  
22 interviews and some may feel uncomfortable discussing the issues with colleagues.  
23  
24 Individual interviews were the preferred method in only one practice. Interviews (group and  
25  
26 individual) were held on only one occasion in each practice.  
27  
28  
29  
30  
31

32 Six practices agreed to take part in semi-structured, audio-recorded interviews, which were  
33  
34 attended by two researchers, between September and October 2012. We recruited three  
35  
36 practices in the high stratum and three practices in the merged medium and low stratum (a  
37  
38 mix of low and medium engagers). The topic guide is outlined in Box 1. Thirty-nine  
39  
40 participants took part in group (n=5) or individual (n=4) interviews. Job roles included GP  
41  
42 (n=9), receptionist (n=7), nurse (n=6), manager (n=6), secretary (n=5), health care assistant  
43  
44 (n=3), medical student (n=2) and phlebotomist (n=1). Practice characteristics are shown in  
45  
46 table 1.  
47  
48  
49  
50  
51  
52  
53  
54  
55  
56  
57  
58  
59  
60

Table 1: Practice and interview characteristics

| Practice characteristic | No. of practices |
|-------------------------|------------------|
| No of partners          |                  |
| 4 or more               | 3                |
| 3 or less               | 3                |
| Deprivation Quintile*   |                  |
| 5 or 4 (more deprived)  | 3                |
| 2 or 3                  | 3                |
| 1 (most affluent)       | 0                |
| Population Density**    |                  |
| <15%                    | 2                |
| 15 to 39%               | 2                |
| >=40%                   | 2                |

\*based on index of multiple deprivation of practice location 2010 (source: Department for Communities and Local Government, Indices of Deprivation 2010)

\*\* Person per hectare based on practice location (source: ONS Neighbourhood Statistics)

The interviews took between 38 and 67 minutes to complete, and between four and eleven staff took part in each practice. All transcribed data were entered into NVivo 10 and analysed using a Thematic Network Analysis approach.[17] This involved an iterative and cyclical process of reading and analysis to identify basic, organising and global themes within the dataset. Analysis was undertaken by two authors (GT and NC) independently on six transcripts initially, followed by an in-depth discussion and consensual validation of key themes. A further cycle of independent and collaborative analysis was then undertaken on a further sub-set of transcripts to ensure rigour and authenticity of the themes generated. All thematic decisions were discussed with the third author (PD). The study was approved by the University of Central Lancashire 'STEMH' ethics committee and individual written informed consent was obtained from all participants.

## RESULTS

Overall, practice staff were well aware of the two-week waiting-time initiative and had good knowledge about the national ‘Be Clear on Cancer’ cancer awareness public campaigns, but had less awareness about other initiatives specifically targeted at primary care. The key global theme to emerge from the interviews related to ‘managing risk’ within primary care:

*“It's quite a tricky, nebulous area [...]. The nature of general practice is that we're dealing every day with uncertainty...”* (Interview 6, Participant 3)

A key concern of staff was that policymakers and those implementing cancer initiatives did not fully understand how risk was managed within primary care. Cancer was only one priority and there was an abundance of initiatives for a variety of conditions which primary care staff were expected to implement. Three underpinning organising themes (and associated basic themes) of ‘complexity’, ‘continuity’ and ‘conflict’ highlighted the tensions and difficulties that primary care face in managing the risk of early detection and referral for cancer symptoms whilst dealing with complex symptoms and care systems, patient-led factors and target-focused care. An overview of the organising and basic themes is presented in figure 1. These themes are described and discussed, contextualised by participant quotes below.

### Complexity

This theme highlighted the complexity of managing risk in early cancer diagnosis because of external factors including cancer symptom differentiation and the restrictions imposed by referral criteria; the multitude of services and professionals involved in diagnostic and

1  
2  
3 assessment services and the plethora of policies and initiatives targeted at primary care  
4  
5 practice.  
6  
7  
8

9  
10 *Cancer disease and symptoms:* Cancer diagnosis was an important priority area in primary  
11 care but diagnosis presented complex challenges. Cancer was a rare diagnosis in primary  
12 care although symptoms associated with cancer were common.  
13  
14

15  
16  
17  
18 *“We get lots of sore throats, and yet we get one tonsillar cancer every three [years] so*  
19 *sorting out the wheat from the chaff is a real challenge.”* (Interview 3, Participant 3)  
20  
21  
22

23  
24  
25 These complexities of diagnosis were compounded by what were considered rigid referral  
26 criteria, based on disease prevalence amongst those with symptoms, which led to cases being  
27 ‘bounced back’ if they failed to meet diagnostic criteria. In attempts to manage what they  
28 considered was a risk to patients, some participants said, on occasion, they had to ‘fudge’,  
29 ‘embellish’ or ‘bend-the-rules’ to ensure assessment of patients for whom they had concerns:  
30  
31  
32  
33

34  
35  
36  
37  
38 *“Even though it says on the form, “don't fill out this form unless they tick any boxes”*  
39 *but you find a box to tick, and usually for very good reason. And I think you'd only go,*  
40 *slightly over egging the presentation if you were pretty sure there was something*  
41 *there, something going on.”* (Interview 4, Participant 4)  
42  
43  
44  
45  
46  
47  
48

49  
50 *Fragmentation and access to diagnostic services:* Primary care staff expressed difficulties  
51 accessing diagnostic services due to on-going service re-configurations and the involvement  
52 of multiple agencies. This led to fragmentation in terms of staff not always knowing who, or  
53 to which services, referrals could be made.  
54  
55  
56  
57  
58  
59  
60

1  
2  
3  
4  
5 There were also some concerns about fragmented relationships between primary and  
6  
7 secondary care with several participants feeling frustrated by restricted access to diagnostics  
8  
9 for certain conditions. Some participants considered this was due to 'empire building' by  
10  
11 professionals justifying and 'preserving' their service by retaining ownership of who was  
12  
13 qualified to make referrals:  
14

15  
16  
17  
18 *"I can send people for a CT scan if I have a concern about them, for some conditions,*  
19  
20 *but not others. Well why not? I'm the one who's initiating the referral in the first*  
21  
22 *place. You trust me to initiate the referral to pick the patient and prepare them so that*  
23  
24 *you can come along and just arrange the scan and look at it."* (Interview 4,  
25  
26  
27 Participant 3)  
28

29  
30  
31  
32 Whilst some GPs wanted more direct access to diagnostics, this was not universal, and others  
33  
34 highlighted the need for 'training' prior to referrals being made.  
35  
36

37  
38 *Guidelines content and information overload:* Participants referred to the usefulness of  
39  
40 guidelines to help symptom differentiation and manage risk. Knowledge was felt to be  
41  
42 experientially derived and referral guidelines only considered useful for less experienced  
43  
44 doctors. Risk assessment tools were occasionally considered unnecessarily complex when  
45  
46 patients had 'red flag' symptoms and, as previously mentioned, sometimes restrictive for use  
47  
48 in primary care:  
49  
50

51  
52  
53  
54 *"I mean, you see, from a GPs point of view, if somebody comes in who is fifty-five*  
55  
56 *years of age, and passes blood in his stool, you need to exclude a cancer. Now, I don't*  
57  
58  
59  
60

1  
2  
3 *want to know how many percentage of those people pass blood in the motion will*  
4  
5 *have cancer, or how many will have piles, or inflammatory bowel disease or what*  
6  
7 *have you.” (Interview 4, Participant 3)*  
8  
9

10  
11  
12 Concerns were expressed about the number of guidelines available for different conditions  
13  
14 and inconsistencies between different sources:  
15

16  
17  
18 *“And that’s the problem ‘cause last year there was a big campaign, “if you have a*  
19 *cough for more than three weeks you need to go and see a doctor”, but NICE*  
20 *guidelines is six weeks.” (Interview 6, Participant 4)*  
21  
22  
23  
24  
25

26  
27 Participants described how the ‘tsunami’ of new guidelines, care plans and initiatives meant it  
28  
29 was difficult to keep up-to-date:  
30  
31

32  
33  
34 *“And I thought ‘that’s probably a squamous cell carcinoma. That needs a two-week*  
35 *wait referral’. Then, I actually checked the guidelines, the guidelines say that “it’s got*  
36 *to be over one centimetre and you’ve got to wait more than eight weeks really for it to*  
37 *grow” etcetera, etcetera [...] and those things will change on a regular basis. Now,*  
38 *how do you expect an entire network of primary care physicians to stay current with*  
39 *all those guidelines and apply them religiously?” (Interview 2, Participant 3).*  
40  
41  
42  
43  
44  
45  
46  
47  
48  
49  
50

## 51 52 Continuity

53  
54 Practice staff expressed concern that a lack of continuity increased the risk of missing  
55  
56 diagnoses and/or supporting the patient through a difficult period. This was highlighted  
57  
58  
59  
60

1  
2  
3 through discussions about relationships between patients and clinicians; delays in information  
4 sharing across the primary and secondary care interface and patient follow-up after initial  
5 consultation.  
6  
7  
8  
9

10  
11 *Patient-practice relationships:* Continuity-of-carer could not always be achieved in practice,  
12 even though it was felt that patients preferred it and its absence was thought to possibly  
13 contribute to diagnostic delay:  
14  
15  
16  
17

18  
19  
20  
21 *“People have been hopping around from one clinician to another and that, and you*  
22 *don't see the evolution of the story until it hits you in the face. Patients book on the*  
23 *day, they don't necessarily get in the person they normally see, they get in with the*  
24 *available, so that can disjoint things.” (Interview 3, Participant 4)*  
25  
26  
27  
28  
29

30  
31  
32 Staff felt that smaller, rural practices had closer relationships with their patients and their  
33 community, which would lead to earlier consultation. However, others felt awareness of  
34 cancer deaths was heightened in close-knit communities, which could reinforce negative  
35 views towards cancer and cancer survivorship amongst the local population and delay access  
36 to services.  
37  
38  
39  
40  
41  
42  
43  
44

45 *Primary care and secondary care interface:* Expedited assessment following GP referral of  
46 patients through the two-week wait initiative was perceived to work well by practice staff,  
47 but delays further on in the assessment process, and outside of primary care control, were felt  
48 to put patients at risk again and exacerbated their concerns:  
49  
50  
51  
52  
53  
54  
55  
56  
57  
58  
59  
60



1  
2  
3       *“And, well, it's very difficult from our point of view, ‘cause we're saying, ‘look, you*  
4       *know this may be nothing serious, however, I want to refer you on the system, you'll*  
5       *get an appointment in two weeks”, and they do get seen, but then there's a massive*  
6       *delay, so, you know, then they're kinda all heightened up because they're thinking,*  
7       *“{whispered} the doctor thinks I've got cancer” and then nothing happens for ages,*  
8       *and it's really hard for the patients.”* (Interview 3, Participant 5)  
9  
10  
11  
12  
13  
14  
15  
16  
17  
18  
19  
20

21       *Practice-based follow-up:* Patients themselves were also considered to cause delays if they  
22       failed to attend. Practices debated the extent to which they should chase these patients up and  
23       the risks if they did not:  
24  
25  
26  
27  
28

29       *“In the back of their mind they know they should, but if they face the fact that they're*  
30       *going back, are they are going to be faced with something else? You also have to be*  
31       *responsible for the fact that if that doesn't stop, you must persist, and accept the fact*  
32       *that, if you don't, then you could, somewhere down the line end up with something so*  
33       *serious that it's only going to be palliative.”* (Interview 2, Participant 1)  
34  
35  
36  
37  
38  
39  
40  
41  
42  
43

#### 44       Conflict

45  
46       Within this theme, managing risk was related to primary care focus on targets; conflicting  
47       opinions about the role of non-clinical staff and about the worries and tensions generated by  
48       cancer awareness campaigns.  
49  
50  
51  
52  
53  
54

55       *Prevention versus target driven care:* It is recognised that primary care can make a significant  
56       contribution to public health through promotion, in the practice population, of healthier  
57  
58  
59  
60

1  
2  
3 lifestyles and earlier presentation of symptoms of diseases, where early intervention reduces  
4 morbidity and mortality, such as cancer. Primary care staff considered cancer a public health  
5 priority but some felt that there was a tension between adopting preventative approaches in  
6 the practice such as promoting cancer awareness and early presentation and the way that  
7 primary care is currently funded through achieving specific targets mainly relating to the  
8 management of long-term conditions (Quality and Outcomes Framework):  
9  
10  
11  
12  
13  
14  
15  
16  
17  
18  
19  
20  
21  
22  
23  
24  
25  
26  
27  
28  
29  
30  
31

*“We’re not as good with public health, with local public health initiatives, as maybe we should be necessarily. It’s just time to do things, and those things aren’t required of our core business, and when you have a very detailed contract that tells you what you will be paid for doing...” (Interview 2, Participant 3)*

*Staff roles:* There were conflicting views around the role of other practice staff in managing the risk of cancer detection and awareness, in particular with regard to reception staff. Some staff viewed the reception role as a health advisor, whereas others perceived their role to be purely administrative. Additionally, there were reservations about the ability of reception staff to relay cancer messages and how the public might feel about receiving health information from them:  
32  
33  
34  
35  
36  
37  
38  
39  
40  
41  
42  
43  
44  
45  
46  
47  
48  
49  
50  
51  
52  
53  
54  
55  
56  
57  
58  
59  
60

*“You’re passing clinical responsibility to people who are non-clinical. It’s alright for patients to speak to them, and that’s fine, but, I’m not gonna use the receptionists as a source of information [...]. I think anything clinical should be passed to the doctor full stop. I don’t think there is any other role for the receptionist.” (Interview 4, Participant 3)*

1  
2  
3  
4  
5 There were also concerns about potential litigation issues if reception staff were to give  
6  
7 advice and how this could impact on the practice:  
8  
9

10  
11 *“I think it's also worth mentioning at this point, because of our roles, how they are,*  
12 *we get a lot of patients not happy about us supplying information, because we're not*  
13 *allowed to diagnose, obviously for obvious reasons, but if you was to imply*  
14 *something, that could come back on us twice as hard because you'd implied*  
15 *something that could be wrong, and therefore it is now your fault.”* (Interview 1,  
16  
17  
18  
19  
20  
21  
22  
23 Participant 1)  
24  
25  
26

27 A further issue associated with staff roles in helping to manage risk was the identified  
28  
29 benefits of having a chain of communication between all practice members. For example,  
30  
31 receptionists being able to ‘raise issues’ with the doctor if they know someone is coming in  
32  
33 who has symptoms the doctor should be aware of but the patient ‘may not say anything’. This  
34  
35 can also work the other way:  
36  
37  
38  
39

40 *“Patients that I worry about, I will leave messages. I'll mention to reception or*  
41 *mention to people that I want to follow them up.”* (Interview 6, Participant 3)  
42  
43  
44  
45  
46

47 Others felt that the focus on the long-term conditions might provide opportunities for practice  
48  
49 nurses to be more involved as they were often seeing patients who might be at higher risk of  
50  
51 cancer because of their age, disease condition or lifestyle behaviours:  
52  
53  
54

55  
56 *“Chronic disease, yeah, so diabetic, high blood pressure, chronic kidney disease,*  
57  
58  
59  
60

1  
2  
3 *asthma, most patients will come and see the practice nurses for routine bloods, blood*  
4  
5 *pressure, weight, everything like that. So often, GPs don't always see them, I mean*  
6  
7 *they do the medication reviews, but, we flag to them anything that we're worried*  
8  
9 *about.*” (Interview 2, Participant 4)  
10  
11

12  
13  
14 Some could also see a role for members of the wider practice team:

15  
16  
17  
18 *“We'd say 'well who are the district nurses already going out to?' You know, you can*  
19 *work with your local pharmacists.*” (Interview 2, Participant 2)  
20  
21  
22

23  
24  
25 *Cancer awareness:* Although cancer fear was commonly acknowledged, staff were divided as  
26  
27 to whether patients were afraid to consult the GP with cancer symptoms. Some felt that  
28  
29 unhealthy lifestyle choices contributed to patient reluctance to present with cancer symptoms:  
30  
31

32  
33  
34 *“The cancers where they feel that they may have contributed to it, like smoking, they*  
35 *tend to ignore because they don't want to be told that it may be their fault in a certain*  
36 *way, and they don't want to give up the lifestyle.*” (Interview 6, Participant 4)  
37  
38  
39  
40

41  
42  
43 Cancer awareness campaigns were felt to be important, even though those who presented to  
44  
45 the practice following the campaign were more likely to be those at least risk:  
46  
47

48  
49  
50 *“It's the people who never come to the doctors that you want to hit, not the people*  
51 *that were already coming in anyway, and they tend to be ones that see those adverts.*  
52 *But then if you can get one person who wouldn't normally come in and you catch*  
53 *them, then it's better.*” (Interview 5, Participant 1)  
54  
55  
56  
57  
58  
59  
60

1  
2  
3  
4  
5 Campaigns were also felt to create extra work for all practice members. There were  
6  
7 complaints that cancer awareness campaigns tend to run without consideration of other local  
8  
9 or national campaigns which may be running simultaneously which increased the risk that  
10  
11 practice capacity to safely respond to patients was compromised:  
12  
13

14  
15  
16 *“It's like it's alright saying putting in place to get them in, but it's the sheer volume,*  
17  
18 *isn't it? You can only cope with so much can't you?”* (Interview 5, Participant 1)  
19  
20  
21  
22  
23  
24

## 25 **DISCUSSION**

26  
27  
28  
29 This study provides insights into the experiences of primary care staff who manage patients  
30  
31 with symptoms suggestive of cancer. The overarching theme to emerge was the need to  
32  
33 manage risk so that cancer patients had a timely diagnosis and were assessed appropriately.  
34  
35 The associated subthemes of complexity, continuity and conflict highlighted the tensions and  
36  
37 difficulties faced by staff when attempting to manage these risks in modern practice.  
38  
39  
40  
41

42  
43 The study was small, descriptive and exploratory. However, it covered a diverse geographical  
44  
45 area and included practices with varying levels of engagement with awareness and early  
46  
47 diagnosis initiatives. We stratified on engagement to ensure we had a balance of perspectives  
48  
49 so as to better inform policymakers of the possible barriers and drivers to the uptake of  
50  
51 initiatives. The stratification was based on known engagement with the range of national and  
52  
53 regional initiatives to promote earlier presentation, detection and referral of patients with  
54  
55 symptoms suggestive of cancer available to the practices at that time.  
56  
57  
58  
59  
60

1  
2  
3  
4  
5 The findings of our study suggest that national initiatives did not appear to wholly resolve  
6  
7 issues in managing risk for all practitioners. Rather, in some cases, these initiatives were felt  
8  
9 to introduce inherent risks which staff had to find ways to overcome. This included cancer  
10  
11 awareness campaigns which, while felt to be very important to encourage patients who would  
12  
13 otherwise delay diagnosis, also appeared to increase consultation rates from those at lesser  
14  
15 risk. This placed additional burden on the practice.

16  
17  
18 There were also concerns about initiatives introduced to directly support practices.

19  
20  
21 Participants highlighted timely diagnosis as an essential part of their role in cancer care. A  
22  
23 finding reported in an Australian study.[16] This study also identified that the resources spent  
24  
25 gaining timely access to specialist opinion were a major issue. In our study this appeared to  
26  
27 be less of a problem because of the two-week waiting-time initiative. This initiative was  
28  
29 universally embraced by participants as it was felt to work well in facilitating timely  
30  
31 assessment. However, there were still concerns that lack of direct access to diagnostic  
32  
33 investigations and poor communication between primary and secondary care put patients at  
34  
35 risk due to extended delays, as reported in a study undertaken in Ireland.[3] Some  
36  
37 participants in our study felt that the referral criteria for the two-week waiting-time initiative  
38  
39 were too restrictive and this led to practitioners, on occasion, subverting the referral system to  
40  
41 ensure that patients they considered were at risk, but who did not fit the referral criteria, could  
42  
43 be assessed in a timely manner. Such concerns are not unfounded; one study has shown that  
44  
45 8% of cancer patients do not have symptoms which fit referral criteria.[18] This may be  
46  
47 because the presenting signs and symptoms had a lower predictive value for cancer than those  
48  
49 included in the guidelines. Nevertheless, there is high compliance with guidelines and some  
50  
51 limited evidence that referral guidelines contribute, in part, to diagnostic delay reduction.[6,  
52  
53  
54  
55  
56 18]

1  
2  
3  
4  
5 Diagnostic errors leading to primary care malpractice claims are common.[19] Researchers  
6  
7 suggest that although GPs are more likely to correctly diagnose patients with cancer than  
8  
9 miss cases, there are a disproportionate number of deaths amongst the latter.[20, 21]  
10  
11 Diagnostic complexity is compounded by the frequency of consultations for symptoms  
12  
13 associated with cancer, [21, 22] a fear highlighted by practitioners in this study. A study in  
14  
15 Norway, which followed up patients presenting with cancer warning signs to their GP,  
16  
17 suggests that patients with cancer may be missed if multiple warning signs and symptoms are  
18  
19 not considered.[21] Retrospective studies of practice-based data have identified  
20  
21 combinations of warning signs and symptoms which may be associated with increasing the  
22  
23 likelihood of cancer.[23-24] These have been used to inform risk assessment tools to aid  
24  
25 decision-making, with algorithms and probabilities of risk based on demographic  
26  
27 characteristics, lifestyle factors, symptoms and/or attendance frequency.[11] Some have been  
28  
29 disseminated nationally, and there is evidence from both quantitative and qualitative studies  
30  
31 that they affect GPs' decisions to refer.[11] However, in our study, some participants had  
32  
33 similar concerns about these tools as they did guidelines. A recent analysis of significant  
34  
35 event audits in lung cancer highlighted how cancer can mimic other diagnoses and have  
36  
37 atypical presentation.[7] Guidelines and risk assessment tools are analytical tools, and  
38  
39 although statistical probabilities are based on uncertainty, they may be perceived to introduce  
40  
41 a level of certainty which fails to encapsulate practitioners' tacit concerns about patients.  
42  
43 Previous work in primary care decision-making has emphasised the analytical over the  
44  
45 experiential, but recent research , including cancer diagnosis, suggests that experiential  
46  
47 knowledge may have a role and may be more responsive to individual patients.[15, 25-27]  
48  
49 Others have found that better diagnostic decisions appear to be made by older doctors [22]  
50  
51 and, as commented on by some of our participants, that guidelines and risk assessment tools  
52  
53  
54  
55  
56  
57  
58  
59  
60

1  
2  
3 may be more useful for newer practitioners who have yet to develop problem solving  
4  
5 strategies.[28]  
6  
7

8  
9  
10 It has also been observed that, unlike in acute care, decision-making in primary care partly  
11 involves an understanding of the patient context and perspective.[29] Our study participants  
12 highlighted concerns that lack of continuity of carer may lead to diagnostic delays. Relational  
13 continuity was felt to be a particular problem in larger practices and urban settings. Others  
14 suggest that fragmentation of primary care and shorter consultation times has led to a lack of  
15 continuity-of-care or carer, which may hinder early diagnosis as cancer presentation can be  
16 complex in those with multiple co-morbidities.[16, 30, 31] In a qualitative study of lung  
17 cancer patients in New Zealand, patients felt that not always seeing the same GP could lead  
18 to delays in diagnosis due to poor follow up.[32] In a study in Denmark, perceived lack of  
19 accessibility and the doctor-patient relationship were associated with patient delay in seeking  
20 advice about cancer symptoms.[33] Others have found that confidence and trust in a doctor  
21 were more important predictors of cancer detection than ease of access and choice of  
22 preferred doctor.[34]  
23  
24  
25  
26  
27  
28  
29  
30  
31  
32  
33  
34  
35  
36  
37  
38  
39

40 In our study, participants highlighted how other practice team members, such as nurses who  
41 are in more regular contact with patients with long-term conditions, could raise symptom  
42 awareness or be more alert to changes in, or new, symptoms suggestive of cancer. In the US  
43 and Canada, patient navigators are being used to support patients through the complex  
44 systems found in cancer management and care. It has also been suggested that these roles  
45 could be extended to support patients during the diagnostic, referral and assessment processes  
46 and ensure appropriate follow up of investigative results.[35] In our study, some staff felt that  
47 receptionists could act as navigators in terms of directing patients with symptoms to see the  
48  
49  
50  
51  
52  
53  
54  
55  
56  
57  
58  
59  
60



1  
2  
3 GP.[36] Low levels of knowledge about some cancer symptoms has been demonstrated in  
4  
5 non-medical staff.[37] However, our study highlighted that professional boundaries and  
6  
7 concerns about litigation which might impede such initiatives; disclosures or discussions of  
8  
9 diagnostic issues within a public reception location also raised ethical concerns. Research  
10  
11 within primary care suggests that facilitation of communities of practice and interdisciplinary  
12  
13 knowledge sharing may help to identify the role of other practice team members in promoting  
14  
15 earlier cancer presentation and diagnosis;[38] although training needs should be  
16  
17 addressed.[37]  
18  
19  
20  
21  
22

23 This study has highlighted that a ‘one-size-fits-all’ approach to implementing initiatives is  
24  
25 unlikely to succeed as practitioners expressed a range of views and opinions on the benefits  
26  
27 of different initiatives. Lack of implementation of initiatives in primary care is not always  
28  
29 because of resistance to the initiatives themselves, but sometimes because of the sheer  
30  
31 number across a range of priority areas that practices are expected to implement, often  
32  
33 simultaneously. Policymakers should consider more carefully how these impact on primary  
34  
35 care, how they can be embedded into practice systems and emphasise and exploit synergies  
36  
37 with other disease conditions.  
38  
39  
40  
41  
42

43 For there to be greater success of initiatives aimed at promoting earlier presentation, detection  
44  
45 and referral in primary care, there needs to be further work on understanding how primary  
46  
47 care manage risk in the face of inherent uncertainty, organisational changes and competing  
48  
49 priorities.  
50  
51  
52  
53  
54  
55  
56  
57  
58  
59  
60

1  
2  
3 **ACKNOWLEDGEMENTS:** Our thanks to the practices who participated in this study and  
4  
5 to the staff of the Lancashire and South Cumbria Cancer Network who assisted us.  
6  
7

8  
9  
10 **COMPETING INTERESTS:** PD was public health lead for LSCCN and NC is part-funded  
11  
12 by a grant from LSCCN; PD was also funded by LSCCN to undertake evaluative work.  
13

14  
15  
16 **FUNDING:** This work was supported by Lancashire and South Cumbria Cancer Network  
17  
18 (LSCCN) as part of the National Cancer Awareness and Early Detection initiative (NAEDI)  
19  
20 funding ‘cancer networks supporting primary care’.  
21  
22

#### 23 24 25 **CONTRIBUTIONS:**

26  
27 NC recruited participants, carried out interviews, transcribed the interviews, coded the  
28  
29 transcripts, contributed to the development of the coding framework, and contributed to the  
30  
31 writing of the manuscript.  
32

33  
34 GT carried out interviews, coded the transcripts, contributed to the development of the coding  
35  
36 framework and contributed to the writing of the manuscript.  
37

38  
39 PD designed the study, collated practice engagement data, contributed to the development of  
40  
41 the coding of the framework and contributed to the writing of the manuscript.  
42  
43

44  
45 **DATA SHARING:** No further data are available  
46  
47

#### 48 49 50 51 52 53 54 55 56 **REFERENCES** 57 58 59 60

- 1  
2  
3 1. Haward R. The Calman-Hine report: a personal retrospective on the UK's first  
4 comprehensive policy on cancer services. *The Lancet Oncology*. 2006;7(4):336-46.  
5  
6
- 7 2. Coleman MP, Foreman D, Bryant H, et al. Cancer survival in Australia, Canada,  
8 Denmark, Norway, Sweden, and the UK, 1995—2007 (the International Cancer  
9 Benchmarking Partnership): an analysis of population-based cancer registry data. *The*  
10 *Lancet*. 2011;377:127–38. doi:10.1016/S0140-6736(10)62231-3.  
11  
12
- 13 3. Daly H, Collins C. Barriers to early diagnosis of cancer in primary care: a needs  
14 assessment of GPs. *Ir Med J*. 2007; 100(10):624-26  
15  
16
- 17 4. Ingebrigsten SG, Scheel BI, Hart B, et al. Frequency of ‘warning signs of cancer’ in  
18 Norwegian general practice, with prospective recording of subsequent cancer. *Fam*  
19 *Pract*. 2013;30:153-160  
20  
21
- 22 5. National Institute for Clinical Excellence. Clinical Guideline 27. Referral guidelines  
23 for suspected cancer. 2005.  
24  
25 <http://www.nice.org.uk/nicemedia/live/10968/29814/29814.pdf> accessed 3/1/2014.  
26  
27
- 28 6. Neal RD, Din NU, Hamilton W, et al. Comparison of cancer diagnostic intervals  
29 before and after implementation of NICE guidelines: analysis of data from the UK  
30 General Practice Research Database. *Br J Cancer*. 2014;110(3):584-92.  
31  
32 doi:10.1038/bjc.2013.791. 4.  
33  
34
- 35 7. Mitchell ED, Rubin G, McLeod U. Understanding diagnosis of lung cancer in primary  
36 care: qualitative synthesis of significant event audit reports. *Br J Gen Pract*.  
37  
38 2013;63(606):e37-46. doi:10.3399/bjgp13X660760.  
39  
40
- 41 8. Royal College of General Practitioners. Clinical Innovation and Research Centre.  
42  
43 National Audit of Cancer Diagnosis in Primary Care. 2011.  
44  
45 [http://www.rcgp.org.uk/news/2011/november/~/\\_media/Files/News/National\\_Audit\\_of](http://www.rcgp.org.uk/news/2011/november/~/_media/Files/News/National_Audit_of_Cancer_Diagnosis_in_Primary-Care.ashx)  
46  
47 [\\_Cancer\\_Diagnosis\\_in\\_Primary-Care.ashx](http://www.rcgp.org.uk/news/2011/november/~/_media/Files/News/National_Audit_of_Cancer_Diagnosis_in_Primary-Care.ashx). last accessed 03/01/2014.  
48  
49  
50  
51  
52  
53  
54  
55  
56  
57  
58  
59  
60

- 1  
2  
3 9. Meechan D, Gildea C, Hollingworth L, et al. Variation in use of the 2-week referral  
4 pathway for suspected cancer: A cross-sectional analysis. *Br J Gen Pract.* 2012;  
5 62(602):e590–97. doi:10.3399/bjgp12X654551.  
6  
7
- 8  
9  
10 10. Elliss-Brookes L, McPhail S, Ives A, et al. Routes to diagnosis for cancer -  
11 determining the patient journey using multiple routine data sets. *Br J Cancer.*  
12 2012;107(8):1220-26. doi:10.1038/bjc.2012.408.  
13  
14
- 15  
16 11. Hamilton W, Green T, Martins T et al. Evaluation of risk assessment tools for  
17 suspected cancer in general practice: a cohort study. *Br J Gen Pract.*  
18 2013;63(606):e30-36. doi:10.3399/bjgp13X660751.  
19  
20
- 21  
22 12. Emery JD, Walter FM, Gray V, et al. Diagnosing cancer in the bush: a mixed-  
23 methods study of symptom appraisal and help-seeking behaviour in people with  
24 cancer from rural Western Australia. *Fam Pract.* 2013 Jun;30(3):294-301.doi:  
25 10.1093/fampra/cms087  
26  
27
- 28  
29 13. Pedersen AF, Hansen RP, Vedsted P. Patient delay in colorectal cancer patients:  
30 associations with rectal bleeding and thoughts about cancer. *PLoS One.* 2013:Jul  
31 22;8(7):e69700.doi: 10.1371/journal.pone.0069700  
32  
33
- 34  
35 14. Marlow LA, McGregor LM, Nazroo JY, et al. Facilitators and barriers to help-seeking  
36 for breast and cervical cancer symptoms: a qualitative study with an ethnically diverse  
37 sample in London. *Psychooncology.* 2013;Dec 19.doi:10.1002/pon.3464  
38  
39
- 40  
41 15. Johansen ML, Holtedahl KA, Rudebeck CE. How does the thought of cancer arise in  
42 a general practice consultation? Interviews with GPs. *Scand J Prim Health Care.*  
43 2012;30(3):135-40. doi:10.3109/02813432.2012.688701.  
44  
45
- 46  
47 16. Mitchell GK, Burrige LH, Colquist SP, et al. General Practitioners' perceptions of  
48 their role in cancer care and factors which influence this role. *Health Soc Care*  
49 *Community.* 2012; 20(6):607-16. doi:10.1111/j.1365-2524.2012.01075.x  
50  
51
- 52  
53  
54  
55  
56  
57  
58  
59  
60

- 1  
2  
3 17. Attride-Stirling J. Thematic networks: an analytic tool for qualitative research.  
4  
5 *Qualitative Research*. 2001;1(3):385-405. doi:10.1177/146879410100100307.  
6  
7  
8 18. Baughan P, Keatings J, O'Neill B. Urgent suspected cancer referrals from general  
9  
10 practice: audit of compliance with guidelines and referral outcomes. *Br J Gen Pract*.  
11  
12 2011; doi:10.3399/bjgp11X606591.  
13  
14 19. Wallace E, Lowry J, Smith SM, et al. The epidemiology of malpractice claims in  
15  
16 primary care: a systematic review. *BMJ Open*. 2013;3:e002929.  
17  
18 doi:10.1136/bmjopen-2013-002929.  
19  
20  
21 20. Balla J, Heneghan C, Thompson M, et al. Clinical decision making in a high-risk  
22  
23 primary care environment: a qualitative study in the UK. *BMJ Open*. 2012;2:e000414.  
24  
25 doi:10.1136/bmjopen-2011-000414  
26  
27  
28 21. Scheel BI, Ingebrigsten SG, Thorsen T, et al. Cancer suspicion in general practice: the  
29  
30 role of symptoms and patient characteristics, and their association with subsequent  
31  
32 cancer. *Br J Gen Pract*. 2013;doi:10.3399/bjgp13X671614  
33  
34  
35 22. Jiwa M, Gordon M, Arnet H, et al. Referring patients to specialists: a structured  
36  
37 vignette survey of Australian and British GPs. *BMC Fam Pract*. 2008; 9:2.doi:  
38  
39 10.1186/1471-2296-9-2.  
40  
41  
42 23. Emery J. Editorial: Assessment of cancer risk in men and women. *Br J Gen Pract*.  
43  
44 2013;63(606):4-5.doi:10.3399/bjgp13X660607.  
45  
46  
47 24. Hamilton W. The CAPER studies: five case-control studies aimed at identifying and  
48  
49 quantifying the risk of cancer in symptomatic primary care patients. *Br J*  
50  
51 *Cancer*.2009;101: S80-S86 doi:10.1038/sj.bjc.6605396  
52  
53  
54 25. André M, Andén A, Borgquist L, et al. GPs' decision-making-perceiving the patient  
55  
56 as a person or a disease. *BMC Fam Pract*. 2012;13:38. doi:10.1186/1471-2296-13-38.  
57  
58  
59  
60

- 1  
2  
3 26. Stolper E, Van de Wiel M, Van Royen P, et al. Gut feelings as a third track in general  
4 practitioners' diagnostic reasoning. *J Gen Intern Med.* 2011;26(2):197-203.  
5  
6 doi:10.1007/s11606-010-1524-5.  
7  
8  
9  
10 27. Zwolsman S, te Pas E, Hoofst L, et al. Barriers to GPs' use of evidence-based  
11 medicine: a systematic review. *Br J Gen Pract.* 2012;62(600):e511-21. doi:  
12  
13 10.3399/bjgp12X652382.  
14  
15  
16 28. Salah A, Hassan A. Cognitive schemes and strategies in diagnostic and therapeutic  
17 decision making: a primer for trainees. *Perspect Med Educ.* 2013; 2:321-31.  
18  
19 doi:10.1007/s40037-013-0070-3  
20  
21  
22  
23 29. O'Riordan M, Dahinden A, Aktürk Z, et al. Dealing with uncertainty in general  
24 practice: an essential skill for the general practitioner. *Qual Prim Care.* 2011;19:175-  
25  
26 81.  
27  
28  
29  
30 30. Brindle L, Pope C, Corner J, et al. Eliciting symptoms interpreted as normal by  
31 patients with early lung cancer. *BMJ Open.* 2012;2:e001977. doi:10.1136/bmjopen-  
32  
33 2012-001977.  
34  
35  
36  
37 31. Round T, Steed L, Shankleman J, et al. Primary care delays in diagnosing cancer:  
38 what is causing them and what can we do about them? *J R Soc Med.*  
39  
40 2013;106(11):437-40. doi:10.1177/0141076813504744.  
41  
42  
43 32. Walton L, McNeill R, Stevens W, et al. Patient perceptions of barriers to the early  
44 diagnosis of lung cancer and advice for health service improvement. *Fam Pract.*  
45  
46 2013;30:439-44 doi:10.1093/fampra/cmt001  
47  
48  
49  
50 33. Hansen RP, Vedsted P, Sokolowski I, et al. General practitioner characteristics and  
51 delay in cancer diagnosis: a population-based cohort study. *BMC Fam Pract.* 2011;  
52  
53 12:100  
54  
55  
56  
57  
58  
59  
60

- 1  
2  
3 34. Rogers S, Gildea C, Meechan D, et al. Access, continuity of care and consultation  
4  
5 quality: which best predicts urgent cancer referrals from general practice? *J Public*  
6  
7 *Health (Oxf)*. 2014 Jan 23. [Epub ahead of print]  
8  
9  
10 35. Lee J-H, Fulp W, Wells KJ, et al. Effect of patient navigation on time to diagnostic  
11  
12 resolution among patients with colorectal cancer-related abnormalities. *J Canc Educ*.  
13  
14 2014;29:144-50  
15  
16 36. Dohan D, Schrag D. Using navigators to improve care of underserved patients.  
17  
18 *Cancer*. 2005;104:848-55. doi:10.1002/cncr.21214.  
19  
20  
21 37. Cook N, Hart A, Nuttall K, et al. A telephone survey of cancer awareness among  
22  
23 frontline staff: informing training needs. *Br J Cancer*. 2011;105(3):340-45.  
24  
25 doi:10.1038/bjc.  
26  
27 38. Kislov R, Walshe K, Harvey G. Managing boundaries in primary care service  
28  
29 improvement: a developmental approach to communities of practice. *Implement Sci*.  
30  
31 2012;7:97. doi:10.1186/1748-5908-7-97.  
32  
33  
34  
35  
36  
37  
38  
39  
40  
41  
42  
43  
44  
45  
46  
47  
48  
49  
50  
51  
52  
53  
54  
55  
56  
57  
58  
59  
60

1  
2  
3 **Figure 1: organising themes of complexity, continuity and conflict with their associated**  
4 **basic themes, centred around the global theme of managing risk in primary care**  
5  
6  
7  
8  
9  
10  
11  
12  
13  
14  
15  
16  
17  
18  
19  
20  
21  
22  
23  
24  
25  
26  
27  
28  
29  
30  
31  
32  
33  
34  
35  
36  
37  
38  
39  
40  
41  
42  
43  
44  
45  
46  
47  
48  
49  
50  
51  
52  
53  
54  
55  
56  
57  
58  
59  
60

For peer review only



## Box 1: Semi-structured interview schedule

- Why do you think people with symptoms suggestive of cancer do not present, get seen or diagnosed or referred earlier?
- What do you know about the initiatives that concern the earlier presentation, diagnosis and referral of cancer symptoms?
  - Prompts around specific tools/initiatives/referral criteria
- Have you accessed any local training events concerning the identification, referral of cancer patients?
  - Prompts around specific training attended, and how learning is usually undertaken
- Overall, what is working well in terms of the implementation and use of these initiatives?
- Overall, have you experienced any/or what do you consider to be the main barriers in the implementation/access/use of these various initiatives?
- Are there any practice based issues that may affect the early identification and referral for cancer patients?
  - Prompts around staff and practice issues, communication, administration
- Overall, what do you think local practices could do to help promote and diagnose cancer symptoms?
  - Prompts around team roles and other practice issues
- Do you know about the Lancashire and South Cumbria Cancer Network and what their role is?
  - Prompts around extent of engagement, attitudes and areas for improvement
- What is your opinion concerning the forthcoming 'access to diagnostics' initiative (initiative for practices to make direct referrals to diagnostics such as x-rays, CT scans, ultrasound)?
  - Prompts around who should make the referral
- Are there any additional support mechanisms/external to the practice that need to be in place to help with promotion/diagnosis and referral?
- Any further issues or concerns you would like to raise about this work?

1  
2  
3  
4  
5  
6  
7  
8  
9 **Managing the risk of cancer earlier presentation, detection and referral: a qualitative**  
10 **study of primary care staff views**  
11  
12  
13

14  
15  
16  
17 Neil Cook, Research Assistant, School of Medicine and Dentistry, University of Central  
18 Lancashire, Preston, England\*  
19

20  
21  
22  
23  
24 Gillian Thomson, Senior Research Fellow, School of Health, University of Central  
25 Lancashire, Preston, England  
26  
27

28  
29  
30 Paola Dey, Professor of Public Health Epidemiology, School of Medicine and Dentistry,  
31 University of Central Lancashire, Preston, England  
32  
33  
34  
35  
36  
37  
38  
39  
40  
41

42 \*corresponding author: Neil Cook, School of Medicine and Dentistry, Greenbank Building,  
43 University of Central Lancashire, Adelphi Street, Preston, England PR1 2HE  
44  
45  
46 Email: [NCook2@uclan.ac.uk](mailto:NCook2@uclan.ac.uk) Phone: 01772 893409  
47  
48  
49

50  
51 **Key Words:** primary health care, general practice, neoplasms, qualitative research, early  
52 detection of cancer.  
53  
54

55  
56  
57 Word count: abstract- 232, manuscript - 4,504  
58  
59  
60

**ABSTRACT**

Objectives: In the UK, there have been a number of national initiatives to promote earlier detection and prompt referral of patients presenting to primary care with signs and symptoms of cancer. The aim of the study was to explore the experiences of a range of primary care staff in promoting earlier presentation, detection and referral of patients with symptoms suggestive of cancer.

Setting: Six primary care practices in North West England.

Participants: Thirty-nine primary care staff from a variety of disciplines took part in five group and four individual interviews.

Results: The global theme to emerge from the interviews was 'managing risk', which had three underpinning organising themes: 'complexity', relating to uncertainty of cancer diagnoses, service fragmentation and plethora of guidelines; 'continuity', relating to relationships between practice staff and their patients and between primary and secondary care; 'conflict' relating to policy drivers and staff role boundaries. A key concern of staff was that policymakers and those implementing cancer initiatives did not fully understand how risk was managed within primary care.

Conclusion: Primary care staff expressed a range of views and opinions on the benefits of cancer initiatives. National initiatives did not appear to wholly resolve issues in managing risk for all practitioners. Staff were concerned about the number of guidelines and priorities

1  
2  
3 they were expected to implement. These issues need to be considered by policymakers when  
4  
5 developing and implementing new initiatives.  
6  
7

## 8 9 10 **ARTICLE SUMMARY**

### 11 12 13 14 **Strengths and limitations of this study**

- 15  
16 • The study investigates the experiences of a range of primary care staff around  
17  
18 implementing initiatives for the earlier diagnosis of cancer.  
19
- 20  
21 • The underlying concern in primary care is related to managing risk.  
22
- 23  
24 • The sample included a mix of practices with different practice characteristics and  
25  
26 included those known to be engaged in national and regional initiatives and those who  
27  
28 were less engaged.  
29
- 30  
31 • The sample was drawn from a single English region.  
32  
33  
34  
35  
36  
37  
38  
39  
40  
41  
42  
43  
44  
45  
46  
47  
48  
49  
50  
51  
52  
53  
54  
55  
56  
57  
58  
59  
60

## INTRODUCTION

Studies in the 1990s showed that UK cancer survival rates were worse than many other European countries, following which there has been two decades of concerted effort to expedite access to proven effective cancer treatments.[1] While there have been improvements in cancer survival latterly, the UK still lags behind many other countries with similar health care systems, which may be partly due to later stage of disease at presentation. [2]

Both nationally and internationally, primary care is seen to have a key role in improving cancer survival by reducing delays in diagnosis through promoting earlier presentation and through earlier detection and referral of those with symptoms for further specialist assessment.[3, 4] In the UK, national campaigns extol those with symptoms to see their general practitioner earlier; there are national referral guidelines for suspected cancer and a national system for urgent referral from primary to secondary care (two-week waiting-time initiative).[5] However, evidence suggests that there may be further room for improvement:[6] there is practice variation in the use of the 'two-week' initiative and some patients are seen several times in primary care before referral.[7-9] A significant proportion of patients also present through emergency routes and have poorer survival.[10]

To further support primary care in the UK, resources were developed and/or disseminated by the Department of Health's National Awareness and Early Diagnosis Initiative (NAEDI), established in 2008, and the Royal College of General Practitioners (RCGP) including: audit and significant events analysis tools,[7, 8] general practitioner (GP) level cancer profile data, safety netting recommendations and risk assessment tools.[11] Key initiatives have mainly

1  
2  
3 focused on GPs, but other members of the primary care team may have key roles: an area  
4  
5 which has been largely unexplored.  
6  
7

8  
9  
10 A number of international studies have been undertaken in attempts to understand the reasons  
11 behind delay in cancer diagnosis. Qualitative studies have mostly focussed on patient  
12 perspectives.[12-14] Only a few have explored primary care experiences and these have been  
13  
14 mainly limited to decision-making processes or referral pathways [11, 15, 16] and from the  
15  
16 perspective of the general practitioner. [3, 11, 15,16] In order to understand how a range of  
17  
18 initiatives across the patient pathway in primary care could be more effective and the role of  
19  
20 other members of the practice team, we explored the experiences of a range of primary care  
21  
22 staff in supporting earlier presentation, detection and referral of those with symptoms  
23  
24 suggestive of cancer. The study was undertaken in one region of England, which at that time  
25  
26 was covered by the Lancashire and South Cumbria Cancer Network (LSSCN).  
27  
28  
29  
30  
31  
32  
33  
34  
35

## 36 METHODS

37  
38  
39  
40 This was a qualitative descriptive study utilising both individual and group-based interviews.  
41  
42 It aimed to recruit staff from six practices who were differentially engaged with the national  
43  
44 awareness and early diagnosis of cancer agenda. GP practices within LSSCN were stratified  
45  
46 into one of three groups at the end of June 2012. High engagers had participated in at least  
47  
48 one of the following: RCGP cancer audit, attendance at a course on early diagnosis or face-  
49  
50 to-face meetings to discuss GP cancer profiles and action planning. Medium engagers had  
51  
52 attended at least one regional meeting about cancer awareness. Low engagers were not  
53  
54  
55  
56  
57  
58  
59  
60

1  
2  
3 known to have engaged in any initiatives. Of 254 practices in the geographical area, there  
4  
5 were 51 high engagers, 69 medium engagers and 134 low engagers.  
6  
7

8  
9  
10 Within each group, a random sample of 10 practices were sent a letter about the study,  
11  
12 followed up with a phone call from the research team one week later. The initial aim was to  
13  
14 recruit at least two practices in each stratum. Due to low uptake within the medium and low  
15  
16 engager strata, these categories were merged and a random sample of a further 15 practices  
17  
18 sent letters. Practices were offered a choice of either group or individual interviews as it was  
19  
20 recognised that time constraints prevent some practice staff from taking part in group  
21  
22 interviews and some may feel uncomfortable discussing the issues with colleagues.  
23  
24 Individual interviews were the preferred method in only one practice. Interviews (group and  
25  
26 individual) were held on only one occasion in each practice.  
27  
28  
29  
30  
31

32 Six practices agreed to take part in semi-structured, audio-recorded interviews, which were  
33  
34 attended by two researchers, between September and October 2012. We recruited three  
35  
36 practices in the high stratum and three practices in the merged medium and low stratum (a  
37  
38 mix of low and medium engagers). The topic guide is outlined in Box 1. Thirty-nine  
39  
40 participants took part in group (n=5) or individual (n=4) interviews. Job roles included GP  
41  
42 (n=9), receptionist (n=7), nurse (n=6), manager (n=6), secretary (n=5), health care assistant  
43  
44 (n=3), medical student (n=2) and phlebotomist (n=1). Practice characteristics are shown in  
45  
46 table 1.  
47  
48  
49  
50  
51  
52  
53  
54  
55  
56  
57  
58  
59  
60

Table 1: Practice and interview characteristics

| Practice characteristic | No. of practices |
|-------------------------|------------------|
| No of partners          |                  |
| 4 or more               | 3                |
| 3 or less               | 3                |
| Deprivation Quintile*   |                  |
| 5 or 4 (more deprived)  | 3                |
| 2 or 3                  | 3                |
| 1 (most affluent)       | 0                |
| Population Density**    |                  |
| <15%                    | 2                |
| 15 to 39%               | 2                |
| >=40%                   | 2                |

\*based on index of multiple deprivation of practice location 2010 (source: Department for Communities and Local Government, Indices of Deprivation 2010)

\*\* Person per hectare based on practice location (source: ONS Neighbourhood Statistics)

The interviews took between 38 and 67 minutes to complete, and between four and eleven staff took part in each practice. All transcribed data were entered into NVivo 10 and analysed using a Thematic Network Analysis approach.[17] This involved an iterative and cyclical process of reading and analysis to identify basic, organising and global themes within the dataset. Analysis was undertaken by two authors (GT and NC) independently on six transcripts initially, followed by an in-depth discussion and consensual validation of key themes. A further cycle of independent and collaborative analysis was then undertaken on a further sub-set of transcripts to ensure rigour and authenticity of the themes generated. All thematic decisions were discussed with the third author (PD). The study was approved by the University of Central Lancashire 'STEMH' ethics committee and individual written informed consent was obtained from all participants.



## RESULTS

Overall, practice staff were well aware of the two-week waiting-time initiative and had good knowledge about the national 'Be Clear on Cancer' cancer awareness public campaigns, but had less awareness about other initiatives specifically targeted at primary care. The key global theme to emerge from the interviews related to 'managing risk' within primary care:

*"It's quite a tricky, nebulous area [...]. The nature of general practice is that we're dealing every day with uncertainty..."* (Interview 6, Participant 3)

A key concern of staff was that policymakers and those implementing cancer initiatives did not fully understand how risk was managed within primary care. Cancer was only one priority and there was an abundance of initiatives for a variety of conditions which primary care staff were expected to implement. Three underpinning organising themes (and associated basic themes) of 'complexity', 'continuity' and 'conflict' highlighted the tensions and difficulties that primary care face in managing the risk of early detection and referral for cancer symptoms whilst dealing with complex symptoms and care systems, patient-led factors and target-focused care. An overview of the organising and basic themes is presented in figure 1. These themes are described and discussed, contextualised by participant quotes below.

### Complexity

**This theme highlighted the complexity of managing risk in early cancer diagnosis because of external factors including cancer symptom differentiation and the restrictions imposed by**

1  
2  
3 referral criteria; the multitude of services and professionals involved in diagnostic and  
4  
5 assessment services and the plethora of policies and initiatives targeted at primary care  
6  
7 practice.  
8  
9

10  
11 *Cancer disease and symptoms:* Cancer diagnosis was an important priority area in primary  
12  
13 care but diagnosis presented complex challenges. Cancer was a rare diagnosis in primary  
14  
15 care although symptoms associated with cancer were common.  
16  
17

18  
19  
20  
21 *“We get lots of sore throats, and yet we get one tonsillar cancer every three [years] so*  
22  
23 *sorting out the wheat from the chaff is a real challenge.” (Interview 3, Participant 3)*  
24  
25

26  
27 These complexities of diagnosis were compounded by what were considered rigid referral  
28  
29 criteria, based on disease prevalence amongst those with symptoms, which led to cases being  
30  
31 ‘bounced back’ if they failed to meet diagnostic criteria. In attempts to manage what they  
32  
33 considered was a risk to patients, some participants said, on occasion, they had to ‘fudge’,  
34  
35 ‘embellish’ or ‘bend-the-rules’ to ensure assessment of patients for whom they had concerns:  
36  
37

38  
39  
40 *“Even though it says on the form, “don't fill out this form unless they tick any boxes”*  
41  
42 *but you find a box to tick, and usually for very good reason. And I think you'd only go,*  
43  
44 *slightly over egging the presentation if you were pretty sure there was something*  
45  
46 *there, something going on.” (Interview 4, Participant 4)*  
47  
48  
49

50  
51  
52 *Fragmentation and access to diagnostic services:* Primary care staff expressed difficulties  
53  
54 accessing diagnostic services due to on-going service re-configurations and the involvement  
55  
56  
57  
58  
59  
60

1  
2  
3 of multiple agencies. This led to fragmentation in terms of staff not always knowing who, or  
4  
5 to which services, referrals could be made.  
6  
7

8  
9  
10 There were also some concerns about fragmented relationships between primary and  
11  
12 secondary care with several participants feeling frustrated by restricted access to diagnostics  
13  
14 for certain conditions. Some participants considered this was due to 'empire building' by  
15  
16 professionals justifying and 'preserving' their service by retaining ownership of who was  
17  
18 qualified to make referrals:  
19

20  
21  
22  
23 *"I can send people for a CT scan if I have a concern about them, for some conditions,*  
24  
25 *but not others. Well why not? I'm the one who's initiating the referral in the first*  
26  
27 *place. You trust me to initiate the referral to pick the patient and prepare them so that*  
28  
29 *you can come along and just arrange the scan and look at it."* (Interview 4,  
30  
31 Participant 3)  
32  
33

34  
35  
36 Whilst some GPs wanted more direct access to diagnostics, this was not universal, and others  
37  
38 highlighted the need for 'training' prior to referrals being made.  
39  
40

41  
42  
43 *Guidelines content and information overload:* Participants referred to the usefulness of  
44  
45 guidelines to help symptom differentiation and manage risk. Knowledge was felt to be  
46  
47 experientially derived and referral guidelines only considered useful for less experienced  
48  
49 doctors. Risk assessment tools were occasionally considered unnecessarily complex when  
50  
51 patients had 'red flag' symptoms and, as previously mentioned, sometimes restrictive for use  
52  
53 in primary care:  
54  
55  
56  
57  
58  
59  
60

1  
2  
3 *“I mean, you see, from a GPs point of view, if somebody comes in who is fifty-five*  
4 *years of age, and passes blood in his stool, you need to exclude a cancer. Now, I don’t*  
5 *want to know how many percentage of those people pass blood in the motion will*  
6 *have cancer, or how many will have piles, or inflammatory bowel disease or what*  
7 *have you.”* (Interview 4, Participant 3)  
8  
9  
10  
11  
12  
13

14  
15  
16 Concerns were expressed about the number of guidelines available for different conditions  
17 and inconsistencies between different sources:  
18  
19  
20

21  
22  
23 *“And that’s the problem ‘cause last year there was a big campaign, “if you have a*  
24 *cough for more than three weeks you need to go and see a doctor”, but NICE*  
25 *guidelines is six weeks.”* (Interview 6, Participant 4)  
26  
27  
28  
29  
30  
31

32 **Participants described how the ‘tsunami’ of new guidelines, care plans and initiatives meant it**  
33 **was difficult to keep up-to-date:**  
34  
35  
36  
37

38 *“And I thought ‘that’s probably a squamous cell carcinoma. That needs a two-week*  
39 *wait referral’. Then, I actually checked the guidelines, the guidelines say that “it’s got*  
40 *to be over one centimetre and you’ve got to wait more than eight weeks really for it to*  
41 *grow” etcetera, etcetera [...] and those things will change on a regular basis. Now,*  
42 *how do you expect an entire network of primary care physicians to stay current with*  
43 *all those guidelines and apply them religiously?”* (Interview 2, Participant 3).  
44  
45  
46  
47  
48  
49  
50  
51  
52  
53  
54  
55

56 Continuity  
57  
58  
59  
60

1  
2  
3 Practice staff expressed concern that a lack of continuity increased the risk of missing  
4 diagnoses and/or supporting the patient through a difficult period. This was highlighted  
5 through discussions about relationships between patients and clinicians; delays in information  
6 sharing across the primary and secondary care interface and patient follow-up after initial  
7 consultation.  
8  
9  
10  
11  
12

13  
14  
15  
16 *Patient-practice relationships:* Continuity-of-carer could not always be achieved in practice,  
17 even though it was felt that patients preferred it and its absence was thought to possibly  
18 contribute to diagnostic delay:  
19  
20  
21

22  
23  
24  
25 *“People have been hopping around from one clinician to another and that, and you*  
26 *don't see the evolution of the story until it hits you in the face. Patients book on the*  
27 *day, they don't necessarily get in the person they normally see, they get in with the*  
28 *available, so that can disjoint things.” (Interview 3, Participant 4)*  
29  
30  
31  
32  
33  
34  
35

36 Staff felt that smaller, rural practices had closer relationships with their patients and their  
37 community, which would lead to earlier consultation. However, others felt awareness of  
38 cancer deaths was heightened in close-knit communities, which could reinforce negative  
39 views towards cancer and cancer survivorship amongst the local population and delay access  
40 to services.  
41  
42  
43  
44  
45  
46  
47  
48

49 *Primary care and secondary care interface:* Expedited assessment following GP referral of  
50 patients through the two-week wait initiative was perceived to work well by practice staff,  
51 but delays further on in the assessment process, and outside of primary care control, were felt  
52 to put patients at risk again and exacerbated their concerns:  
53  
54  
55  
56  
57  
58  
59  
60

1  
2  
3  
4  
5 “And, well, it's very difficult from our point of view, ‘cause we're saying, “look, you  
6 know this may be nothing serious, however, I want to refer you on the system, you'll  
7 get an appointment in two weeks”, and they do get seen, but then there's a massive  
8 delay, so, you know, then they're kinda all heightened up because they're thinking,  
9 “{whispered} the doctor thinks I've got cancer” and then nothing happens for ages,  
10 and it's really hard for the patients.” (Interview 3, Participant 5)  
11  
12  
13  
14  
15  
16  
17  
18  
19  
20  
21  
22

23 *Practice-based follow-up:* Patients themselves were also considered to cause delays if they  
24 failed to attend. Practices debated the extent to which they should chase these patients up and  
25 the risks if they did not:  
26  
27  
28  
29  
30  
31

32 “In the back of their mind they know they should, but if they face the fact that they're  
33 going back, are they are going to be faced with something else? You also have to be  
34 responsible for the fact that if that doesn't stop, you must persist, and accept the fact  
35 that, if you don't, then you could, somewhere down the line end up with something so  
36 serious that it's only going to be palliative.” (Interview 2, Participant 1)  
37  
38  
39  
40  
41  
42  
43  
44  
45

#### 46 Conflict

47  
48 Within this theme, managing risk was related to primary care focus on targets; conflicting  
49 opinions about the role of non-clinical staff and about the worries and tensions generated by  
50 cancer awareness campaigns.  
51  
52  
53  
54  
55

56  
57 *Prevention versus target driven care:* It is recognised that primary care can make a significant  
58  
59  
60

1  
2  
3 contribution to public health through promotion, in the practice population, of healthier  
4  
5 lifestyles and earlier presentation of symptoms of diseases, where early intervention reduces  
6  
7 morbidity and mortality, such as cancer. Primary care staff considered cancer a public health  
8  
9 priority but some felt that there was a tension between adopting preventative approaches in  
10  
11 the practice such as promoting cancer awareness and early presentation and the way that  
12  
13 primary care is currently funded through achieving specific targets mainly relating to the  
14  
15 management of long-term conditions (Quality and Outcomes Framework):  
16  
17  
18  
19  
20

21 *“We’re not as good with public health, with local public health initiatives, as maybe*  
22 *we should be necessarily. It’s just time to do things, and those things aren’t required*  
23 *of our core business, and when you have a very detailed contract that tells you what*  
24 *you will be paid for doing...” (Interview 2, Participant 3)*  
25  
26  
27  
28  
29  
30  
31  
32  
33

34 *Staff roles:* There were conflicting views around the role of other practice staff in managing  
35  
36 the risk of cancer detection and awareness, in particular with regard to reception staff. Some  
37  
38 staff viewed the reception role as a health advisor, whereas others perceived their role to be  
39  
40 purely administrative. Additionally, there were reservations about the ability of reception  
41  
42 staff to relay cancer messages and how the public might feel about receiving health  
43  
44 information from them:  
45  
46  
47  
48  
49

50 *“You’re passing clinical responsibility to people who are non-clinical. It’s alright for*  
51 *patients to speak to them, and that’s fine, but, I’m not gonna use the receptionists as a*  
52 *source of information [...]. I think anything clinical should be passed to the doctor*  
53  
54  
55  
56  
57  
58  
59  
60

1  
2  
3 *full stop. I don't think there is any other role for the receptionist.*” (Interview 4,  
4  
5 Participant 3)  
6  
7  
8

9  
10 There were also concerns about potential litigation issues if reception staff were to give  
11  
12 advice and how this could impact on the practice:  
13

14  
15  
16 *“I think it's also worth mentioning at this point, because of our roles, how they are,*  
17  
18 *we get a lot of patients not happy about us supplying information, because we're not*  
19  
20 *allowed to diagnose, obviously for obvious reasons, but if you was to imply*  
21  
22 *something, that could come back on us twice as hard because you'd implied*  
23  
24 *something that could be wrong, and therefore it is now your fault.”* (Interview 1,  
25  
26 Participant 1)  
27  
28  
29

30  
31  
32 A further issue associated with staff roles in helping to manage risk was the identified  
33  
34 benefits of having a chain of communication between all practice members. For example,  
35  
36 receptionists being able to ‘*raise issues*’ with the doctor if they know someone is coming in  
37  
38 who has symptoms the doctor should be aware of but the patient ‘*may not say anything*’. This  
39  
40 can also work the other way:  
41  
42  
43  
44

45 *“Patients that I worry about, I will leave messages. I'll mention to reception or*  
46  
47 *mention to people that I want to follow them up.”* (Interview 6, Participant 3)  
48  
49  
50

51  
52 **Others felt that the focus on the long-term conditions might provide opportunities for practice**  
53  
54 **nurses to be more involved as they were often seeing patients who might be at higher risk of**  
55  
56 **cancer because of their age, disease condition or lifestyle behaviours:**  
57  
58  
59  
60



1  
2  
3  
4  
5 *“Chronic disease, yeah, so diabetic, high blood pressure, chronic kidney disease,*  
6 *asthma, most patients will come and see the practice nurses for routine bloods, blood*  
7 *pressure, weight, everything like that. So often, GPs don’t always see them, I mean*  
8 *they do the medication reviews, but, we flag to them anything that we’re worried*  
9 *about.” (Interview 2, Participant 4)*  
10  
11  
12  
13  
14  
15  
16  
17  
18

19 Some could also see a role for members of the wider practice team:

20  
21  
22  
23 *“We’d say ‘well who are the district nurses already going out to?’ You know, you can*  
24 *work with your local pharmacists.” (Interview 2, Participant 2)*  
25  
26  
27  
28

29 *Cancer awareness:* Although cancer fear was commonly acknowledged, staff were divided as  
30 to whether patients were afraid to consult the GP with cancer symptoms. Some felt that  
31 unhealthy lifestyle choices contributed to patient reluctance to present with cancer symptoms:  
32  
33  
34  
35  
36  
37

38 *“The cancers where they feel that they may have contributed to it, like smoking, they*  
39 *tend to ignore because they don’t want to be told that it may be their fault in a certain*  
40 *way, and they don’t want to give up the lifestyle.” (Interview 6, Participant 4)*  
41  
42  
43  
44  
45  
46

47 Cancer awareness campaigns were felt to be important, even though those who presented to  
48 the practice following the campaign were more likely to be those at least risk:  
49  
50  
51  
52

53  
54 *“It’s the people who never come to the doctors that you want to hit, not the people*  
55 *that were already coming in anyway, and they tend to be ones that see those adverts.*  
56  
57  
58  
59  
60

1  
2  
3 *But then if you can get one person who wouldn't normally come in and you catch*  
4 *them, then it's better.”* (Interview 5, Participant 1)  
5  
6  
7  
8

9  
10 Campaigns were also felt to create extra work for all practice members. There were  
11 complaints that cancer awareness campaigns tend to run without consideration of other local  
12 or national campaigns which may be running simultaneously **which increased the risk that**  
13 **practice capacity to safely respond to patients was compromised:**  
14  
15  
16  
17  
18

19  
20  
21 *“It's like it's alright saying putting in place to get them in, but it's the sheer volume,*  
22 *isn't it? You can only cope with so much can't you?”* (Interview 5, Participant 1)  
23  
24  
25  
26  
27  
28

## 29 **DISCUSSION**

30  
31  
32  
33  
34 **This study provides insights into the experiences of primary care staff who manage patients**  
35 **with symptoms suggestive of cancer.** The overarching theme to emerge was the need to  
36 manage risk so that cancer patients had a timely diagnosis and were assessed appropriately.  
37 The associated subthemes of complexity, continuity and conflict highlighted the tensions and  
38 difficulties faced by staff when attempting to manage these risks in modern practice.  
39  
40  
41  
42  
43  
44  
45  
46

47 The study was small, descriptive and exploratory. However, it covered a diverse geographical  
48 area and included practices with varying levels of engagement with awareness and early  
49 diagnosis initiatives. **We stratified on engagement to ensure we had a balance of perspectives**  
50 **so as to better inform policymakers of the possible barriers and drivers to the uptake of**  
51 **initiatives. The stratification was based on known engagement with the range of national and**  
52  
53  
54  
55  
56  
57  
58  
59  
60

1  
2  
3 regional initiatives to promote earlier presentation, detection and referral of patients with  
4  
5 symptoms suggestive of cancer available to the practices at that time.  
6  
7

8  
9  
10 The findings of our study suggest that national initiatives did not appear to wholly resolve  
11  
12 issues in managing risk for all practitioners. Rather, in some cases, these initiatives were felt  
13  
14 to introduce inherent risks which staff had to find ways to overcome. This included cancer  
15  
16 awareness campaigns which, while felt to be very important to encourage patients who would  
17  
18 otherwise delay diagnosis, also appeared to increase consultation rates from those at lesser  
19  
20 risk. This placed additional burden on the practice.  
21

22  
23 There were also concerns about initiatives introduced to directly support practices.

24  
25 Participants highlighted timely diagnosis as an essential part of their role in cancer care. A  
26  
27 finding reported in an Australian study.[16] This study also identified that the resources spent  
28  
29 gaining timely access to specialist opinion were a major issue. In our study this appeared to  
30  
31 be less of a problem because of the two-week waiting-time initiative. This initiative was  
32  
33 universally embraced by participants as it was felt to work well in facilitating timely  
34  
35 assessment. However, there were still concerns that lack of direct access to diagnostic  
36  
37 investigations and poor communication between primary and secondary care put patients at  
38  
39 risk due to extended delays, as reported in a study undertaken in Ireland.[3] Some  
40  
41 participants in our study felt that the referral criteria for the two-week waiting-time initiative  
42  
43 were too restrictive and this led to practitioners, on occasion, subverting the referral system to  
44  
45 ensure that patients they considered were at risk, but who did not fit the referral criteria, could  
46  
47 be assessed in a timely manner. Such concerns are not unfounded; one study has shown that  
48  
49 8% of cancer patients do not have symptoms which fit referral criteria.[18] This may be  
50  
51 because the presenting signs and symptoms had a lower predictive value for cancer than those  
52  
53 included in the guidelines. Nevertheless, there is high compliance with guidelines and some  
54  
55  
56  
57  
58  
59  
60

1  
2  
3 limited evidence that referral guidelines contribute, in part, to diagnostic delay reduction.[6,  
4  
5 18]

6  
7  
8  
9  
10 Diagnostic errors leading to primary care malpractice claims are common.[19] Researchers  
11 suggest that although GPs are more likely to correctly diagnose patients with cancer than  
12 miss cases, there are a disproportionate number of deaths amongst the latter.[20, 21]  
13  
14 Diagnostic complexity is compounded by the frequency of consultations for symptoms  
15 associated with cancer, [21, 22] a fear highlighted by practitioners in this study. A study in  
16 Norway, which followed up patients presenting with cancer warning signs to their GP,  
17 suggests that patients with cancer may be missed if multiple warning signs and symptoms are  
18 not considered.[21] Retrospective studies of practice-based data have identified  
19 combinations of warning signs and symptoms which may be associated with increasing the  
20 likelihood of cancer.[23-24] These have been used to inform risk assessment tools to aid  
21 decision-making, with algorithms and probabilities of risk based on demographic  
22 characteristics, lifestyle factors, symptoms and/or attendance frequency.[11] Some have been  
23 disseminated nationally, and there is evidence from both quantitative and qualitative studies  
24 that they affect GPs' decisions to refer.[11] However, in our study, some participants had  
25 similar concerns about these tools as they did guidelines. A recent analysis of significant  
26 event audits in lung cancer highlighted how cancer can mimic other diagnoses and have  
27 atypical presentation.[7] Guidelines and risk assessment tools are analytical tools, and  
28 although statistical probabilities are based on uncertainty, they may be perceived to introduce  
29 a level of certainty which fails to encapsulate practitioners' tacit concerns about patients.  
30  
31 Previous work in primary care decision-making has emphasised the analytical over the  
32 experiential, but recent research, including cancer diagnosis, suggests that experiential  
33 knowledge may have a role and may be more responsive to individual patients.[15, 25-27]  
34  
35  
36  
37  
38  
39  
40  
41  
42  
43  
44  
45  
46  
47  
48  
49  
50  
51  
52  
53  
54  
55  
56  
57  
58  
59  
60

1  
2  
3 Others have found that better diagnostic decisions appear to be made by older doctors [22]  
4 and, as commented on by some of our participants, that guidelines and risk assessment tools  
5 may be more useful for newer practitioners who have yet to develop problem solving  
6 strategies.[28]  
7  
8  
9

10  
11  
12  
13  
14 It has also been observed that, unlike in acute care, decision-making in primary care partly  
15 involves an understanding of the patient context and perspective.[29] Our study participants  
16 highlighted concerns that lack of continuity of carer may lead to diagnostic delays. Relational  
17 continuity was felt to be a particular problem in larger practices and urban settings. Others  
18 suggest that fragmentation of primary care and shorter consultation times has led to a lack of  
19 continuity-of-care or carer, which may hinder early diagnosis as cancer presentation can be  
20 complex in those with multiple co-morbidities.[16, 30, 31] In a qualitative study of lung  
21 cancer patients in New Zealand, patients felt that not always seeing the same GP could lead  
22 to delays in diagnosis due to poor follow up.[32] In a study in Denmark, perceived lack of  
23 accessibility and the doctor-patient relationship were associated with patient delay in seeking  
24 advice about cancer symptoms.[33] Others have found that confidence and trust in a doctor  
25 were more important predictors of cancer detection than ease of access and choice of  
26 preferred doctor.[34]  
27  
28  
29  
30  
31  
32  
33  
34  
35  
36  
37  
38  
39  
40  
41  
42  
43  
44

45 In our study, participants highlighted how other practice team members, such as nurses who  
46 are in more regular contact with patients with long-term conditions, could raise symptom  
47 awareness or be more alert to changes in, or new, symptoms suggestive of cancer. In the US  
48 and Canada, patient navigators are being used to support patients through the complex  
49 systems found in cancer management and care. It has also been suggested that these roles  
50 could be extended to support patients during the diagnostic, referral and assessment processes  
51  
52  
53  
54  
55  
56  
57  
58  
59  
60

1  
2  
3 and ensure appropriate follow up of investigative results.[35] In our study, some staff felt that  
4  
5 receptionists could act as navigators in terms of directing patients with symptoms to see the  
6  
7 GP.[36] Low levels of knowledge about some cancer symptoms has been demonstrated in  
8  
9 non-medical staff.[37] However, our study highlighted that professional boundaries and  
10  
11 concerns about litigation which might impede such initiatives; disclosures or discussions of  
12  
13 diagnostic issues within a public reception location also raised ethical concerns. Research  
14  
15 within primary care suggests that facilitation of communities of practice and interdisciplinary  
16  
17 knowledge sharing may help to identify the role of other practice team members in promoting  
18  
19 earlier cancer presentation and diagnosis;[38] although training needs should be  
20  
21 addressed.[37]  
22  
23  
24  
25  
26

27 This study has highlighted that a 'one-size-fits-all' approach to implementing initiatives is  
28  
29 unlikely to succeed as practitioners expressed a range of views and opinions on the benefits  
30  
31 of different initiatives. Lack of implementation of initiatives in primary care is not always  
32  
33 because of resistance to the initiatives themselves, but sometimes because of the sheer  
34  
35 number across a range of priority areas that practices are expected to implement, often  
36  
37 simultaneously. Policymakers should consider more carefully how these impact on primary  
38  
39 care, how they can be embedded into practice systems and emphasise and exploit synergies  
40  
41 with other disease conditions.  
42  
43  
44  
45  
46

47 For there to be greater success of initiatives aimed at promoting earlier presentation, detection  
48  
49 and referral in primary care, there needs to be further work on understanding how primary  
50  
51 care manage risk in the face of inherent uncertainty, organisational changes and competing  
52  
53 priorities.  
54  
55  
56  
57  
58  
59  
60

1  
2  
3  
4  
5 **ACKNOWLEDGEMENTS:** Our thanks to the practices who participated in this study and  
6  
7 to the staff of the Lancashire and South Cumbria Cancer Network who assisted us.  
8  
9

10  
11 **COMPETING INTERESTS:** PD was public health lead for LSCCN and NC is part-funded  
12  
13 by a grant from LSCCN; PD was also funded by LSCCN to undertake evaluative work.  
14  
15

16  
17 **FUNDING:** This work was supported by Lancashire and South Cumbria Cancer Network  
18  
19 (LSCCN) as part of the National Cancer Awareness and Early Detection initiative (NAEDI)  
20  
21 funding 'cancer networks supporting primary care'.  
22  
23  
24

#### 25 26 27 **CONTRIBUTIONS:**

28  
29 NC recruited participants, carried out interviews, transcribed the interviews, coded the  
30  
31 transcripts, contributed to the development of the coding framework, and contributed to the  
32  
33 writing of the manuscript.  
34

35  
36 GT carried out interviews, coded the transcripts, contributed to the development of the coding  
37  
38 framework and contributed to the writing of the manuscript.  
39

40  
41 PD designed the study, collated practice engagement data, contributed to the development of  
42  
43 the coding of the framework and contributed to the writing of the manuscript.  
44  
45

46  
47 **DATA SHARING:** No further data are available  
48  
49

#### 50 51 **REFERENCES**

- 52  
53  
54 1. Haward R. The Calman-Hine report: a personal retrospective on the UK's first  
55  
56 comprehensive policy on cancer services. *The Lancet Oncology*. 2006;7(4):336-46.  
57  
58  
59  
60

- 1  
2  
3 2. Coleman MP, Foreman D, Bryant H, et al. Cancer survival in Australia, Canada,  
4  
5 Denmark, Norway, Sweden, and the UK, 1995—2007 (the International Cancer  
6  
7 Benchmarking Partnership): an analysis of population-based cancer registry data. *The*  
8  
9 *Lancet*. 2011;377:127–38. doi:10.1016/S0140-6736(10)62231-3.  
10  
11
- 12 3. Daly H, Collins C. Barriers to early diagnosis of cancer in primary care: a needs  
13  
14 assessment of GPs. *Ir Med J*. 2007; 100(10):624-26  
15
- 16 4. Ingebrigsten SG, Scheel BI, Hart B, et al. Frequency of ‘warning signs of cancer’ in  
17  
18 Norwegian general practice, with prospective recording of subsequent cancer. *Fam*  
19  
20 *Pract*. 2013;30:153-160  
21  
22
- 23 5. National Institute for Clinical Excellence. Clinical Guideline 27. Referral guidelines  
24  
25 for suspected cancer. 2005.  
26  
27 <http://www.nice.org.uk/nicemedia/live/10968/29814/29814.pdf> accessed 3/1/2014.  
28
- 29 6. Neal RD, Din NU, Hamilton W, et al. Comparison of cancer diagnostic intervals  
30  
31 before and after implementation of NICE guidelines: analysis of data from the UK  
32  
33 General Practice Research Database. *Br J Cancer*. 2014;110(3):584-92.  
34  
35 doi:10.1038/bjc.2013.791. 4.  
36  
37
- 38 7. Mitchell ED, Rubin G, McLeod U. Understanding diagnosis of lung cancer in primary  
39  
40 care: qualitative synthesis of significant event audit reports. *Br J Gen Pract*.  
41  
42 2013;63(606):e37-46. doi:10.3399/bjgp13X660760.  
43  
44
- 45 8. Royal College of General Practitioners. Clinical Innovation and Research Centre.  
46  
47 National Audit of Cancer Diagnosis in Primary Care. 2011.  
48  
49 [http://www.rcgp.org.uk/news/2011/november/~media/Files/News/National\\_Audit\\_of](http://www.rcgp.org.uk/news/2011/november/~media/Files/News/National_Audit_of)  
50  
51 [\\_Cancer\\_Diagnosis\\_in\\_Primary-Care.ashx](http://www.rcgp.org.uk/news/2011/november/~media/Files/News/National_Audit_of_Cancer_Diagnosis_in_Primary-Care.ashx). last accessed 03/01/2014.  
52  
53  
54  
55  
56  
57  
58  
59  
60



- 1  
2  
3 9. Meechan D, Gildea C, Hollingworth L, et al. Variation in use of the 2-week referral  
4 pathway for suspected cancer: A cross-sectional analysis. *Br J Gen Pract.* 2012;  
5 62(602):e590–97. doi:10.3399/bjgp12X654551.  
6  
7  
8  
9  
10 10. Elliss-Brookes L, McPhail S, Ives A, et al. Routes to diagnosis for cancer -  
11 determining the patient journey using multiple routine data sets. *Br J Cancer.*  
12 2012;107(8):1220-26. doi:10.1038/bjc.2012.408.  
13  
14  
15  
16 11. Hamilton W, Green T, Martins T et al. Evaluation of risk assessment tools for  
17 suspected cancer in general practice: a cohort study. *Br J Gen Pract.*  
18 2013;63(606):e30-36. doi:10.3399/bjgp13X660751.  
19  
20  
21  
22 12. Emery JD, Walter FM, Gray V, et al. Diagnosing cancer in the bush: a mixed-  
23 methods study of symptom appraisal and help-seeking behaviour in people with  
24 cancer from rural Western Australia. *Fam Pract.* 2013 Jun;30(3):294-301.doi:  
25 10.1093/fampra/cms087  
26  
27  
28  
29  
30  
31 13. Pedersen AF, Hansen RP, Vedsted P. Patient delay in colorectal cancer patients:  
32 associations with rectal bleeding and thoughts about cancer. *PLoS One.* 2013:Jul  
33 22;8(7):e69700.doi: 10.1371/journal.pone.0069700  
34  
35  
36  
37  
38 14. Marlow LA, McGregor LM, Nazroo JY, et al. Facilitators and barriers to help-seeking  
39 for breast and cervical cancer symptoms: a qualitative study with an ethnically diverse  
40 sample in London. *Psychooncology.* 2013;Dec 19.doi:10.1002/pon.3464  
41  
42  
43  
44  
45 15. Johansen ML, Holtedahl KA, Rudebeck CE. How does the thought of cancer arise in  
46 a general practice consultation? Interviews with GPs. *Scand J Prim Health Care.*  
47 2012;30(3):135-40. doi:10.3109/02813432.2012.688701.  
48  
49  
50  
51 16. Mitchell GK, Burridge LH, Colquist SP, et al. General Practitioners' perceptions of  
52 their role in cancer care and factors which influence this role. *Health Soc Care*  
53 *Community.* 2012; 20(6):607-16. doi:10.1111/j.1365-2524.2012.01075.x  
54  
55  
56  
57  
58  
59  
60

- 1  
2  
3 17. Attride-Stirling J. Thematic networks: an analytic tool for qualitative research.  
4  
5 *Qualitative Research*. 2001;1(3):385-405. doi:10.1177/146879410100100307.  
6  
7  
8 18. Baughan P, Keatings J, O'Neill B. Urgent suspected cancer referrals from general  
9  
10 practice: audit of compliance with guidelines and referral outcomes. *Br J Gen Pract*.  
11  
12 2011; doi:10.3399/bjgp11X606591.  
13  
14 19. Wallace E, Lowry J, Smith SM, et al. The epidemiology of malpractice claims in  
15  
16 primary care: a systematic review. *BMJ Open*. 2013;3:e002929.  
17  
18 doi:10.1136/bmjopen-2013-002929.  
19  
20  
21 20. Balla J, Heneghan C, Thompson M, et al. Clinical decision making in a high-risk  
22  
23 primary care environment: a qualitative study in the UK. *BMJ Open*. 2012;2:e000414.  
24  
25 doi:10.1136/bmjopen-2011-000414  
26  
27  
28 21. Scheel BI, Ingebrigsten SG, Thorsen T, et al. Cancer suspicion in general practice: the  
29  
30 role of symptoms and patient characteristics, and their association with subsequent  
31  
32 cancer. *Br J Gen Pract*. 2013;doi:10.3399/bjgp13X671614  
33  
34  
35 22. Jiwa M, Gordon M, Arnet H, et al. Referring patients to specialists: a structured  
36  
37 vignette survey of Australian and British GPs. *BMC Fam Pract*. 2008; 9:2.doi:  
38  
39 10.1186/1471-2296-9-2.  
40  
41  
42 23. Emery J. Editorial: Assessment of cancer risk in men and women. *Br J Gen Pract*.  
43  
44 2013;63(606):4-5.doi:10.3399/bjgp13X660607.  
45  
46  
47 24. Hamilton W. The CAPER studies: five case-control studies aimed at identifying and  
48  
49 quantifying the risk of cancer in symptomatic primary care patients. *Br J*  
50  
51 *Cancer*.2009;101: S80-S86 doi:10.1038/sj.bjc.6605396  
52  
53 25. André M, Andén A, Borgquist L, et al. GPs' decision-making-perceiving the patient  
54  
55 as a person or a disease. *BMC Fam Pract*. 2012;13:38. doi:10.1186/1471-2296-13-38.  
56  
57  
58  
59  
60

- 1  
2  
3 26. Stolper E, Van de Wiel M, Van Royen P, et al. Gut feelings as a third track in general  
4  
5 practitioners' diagnostic reasoning. *J Gen Intern Med.* 2011;26(2):197-203.  
6  
7 doi:10.1007/s11606-010-1524-5.  
8  
9  
10 27. Zwolsman S, te Pas E, Hooft L, et al. Barriers to GPs' use of evidence-based  
11  
12 medicine: a systematic review. *Br J Gen Pract.* 2012;62(600):e511-21. doi:  
13  
14 10.3399/bjgp12X652382.  
15  
16 28. Salah A, Hassan A. Cognitive schemes and strategies in diagnostic and therapeutic  
17  
18 decision making: a primer for trainees. *Perspect Med Educ.* 2013; 2:321-31.  
19  
20 doi:10.1007/s40037-013-0070-3  
21  
22  
23 29. O'Riordan M, Dahinden A, Aktürk Z, et al. Dealing with uncertainty in general  
24  
25 practice: an essential skill for the general practitioner. *Qual Prim Care.* 2011;19:175-  
26  
27 81.  
28  
29  
30 30. Brindle L, Pope C, Corner J, et al. Eliciting symptoms interpreted as normal by  
31  
32 patients with early lung cancer. *BMJ Open.* 2012;2:e001977. doi:10.1136/bmjopen-  
33  
34 2012-001977.  
35  
36  
37 31. Round T, Steed L, Shankleman J, et al. Primary care delays in diagnosing cancer:  
38  
39 what is causing them and what can we do about them? *J R Soc Med.*  
40  
41 2013;106(11):437-40. doi:10.1177/0141076813504744.  
42  
43  
44 32. Walton L, McNeill R, Stevens W, et al. Patient perceptions of barriers to the early  
45  
46 diagnosis of lung cancer and advice for health service improvement. *Fam Pract.*  
47  
48 2013;30:439-44 doi:10.1093/fampra/cmt001  
49  
50  
51 33. Hansen RP, Vedsted P, Sokolowsk I, et al. General practitioner characteristics and  
52  
53 delay in cancer diagnosis: a population-based cohort study. *BMC Fam Pract.* 2011;  
54  
55 12:100  
56  
57  
58  
59  
60

- 1  
2  
3 34. Rogers S, Gildea C, Meechan D, et al. Access, continuity of care and consultation  
4 quality: which best predicts urgent cancer referrals from general practice? *J Public*  
5 *Health (Oxf)*. 2014 Jan 23. [Epub ahead of print]  
6  
7  
8  
9  
10 35. Lee J-H, Fulp W, Wells KJ, et al. Effect of patient navigation on time to diagnostic  
11 resolution among patients with colorectal cancer-related abnormalities. *J Canc Educ*.  
12 2014;29:144-50  
13  
14  
15  
16 36. Dohan D, Schrag D. Using navigators to improve care of underserved patients.  
17 *Cancer*. 2005;104:848-55. doi:10.1002/cncr.21214.  
18  
19  
20  
21 37. Cook N, Hart A, Nuttall K, et al. A telephone survey of cancer awareness among  
22 frontline staff: informing training needs. *Br J Cancer*. 2011;105(3):340-45.  
23 doi:10.1038/bjc.  
24  
25  
26  
27 38. Kislov R, Walshe K, Harvey G. Managing boundaries in primary care service  
28 improvement: a developmental approach to communities of practice. *Implement Sci*.  
29 2012;7:97. doi:10.1186/1748-5908-7-97.  
30  
31  
32  
33  
34  
35  
36  
37  
38  
39  
40  
41  
42  
43  
44  
45  
46  
47  
48  
49  
50  
51  
52  
53  
54  
55  
56  
57  
58  
59  
60

1  
2  
3  
4  
5  
6  
7  
8  
9  
10  
11  
12  
13  
14  
15  
16  
17  
18  
19  
20  
21  
22  
23  
24  
25  
26  
27  
28  
29  
30  
31  
32  
33  
34  
35  
36  
37  
38  
39  
40  
41  
42  
43  
44  
45  
46  
47  
48  
49  
50  
51  
52  
53  
54  
55  
56  
57  
58  
59  
60

**Figure 1: organising themes of complexity, continuity and conflict with their associated basic themes, centred around the global theme of managing risk in primary care**

For peer review only

## Box 1: Semi-structured interview schedule

- Why do you think people with symptoms suggestive of cancer do not present, get seen or diagnosed or referred earlier?
- What do you know about the initiatives that concern the earlier presentation, diagnosis and referral of cancer symptoms?
  - Prompts around specific tools/initiatives/referral criteria
- Have you accessed any local training events concerning the identification, referral of cancer patients?
  - Prompts around specific training attended, and how learning is usually undertaken
- Overall, what is working well in terms of the implementation and use of these initiatives?
- Overall, have you experienced any/or what do you consider to be the main barriers in the implementation/access/use of these various initiatives?
- Are there any practice based issues that may affect the early identification and referral for cancer patients?
  - Prompts around staff and practice issues, communication, administration
- Overall, what do you think local practices could do to help promote and diagnose cancer symptoms?
  - Prompts around team roles and other practice issues
- Do you know about the Lancashire and South Cumbria Cancer Network and what their role is?
  - Prompts around extent of engagement, attitudes and areas for improvement
- What is your opinion concerning the forthcoming ‘access to diagnostics’ initiative (initiative for practices to make direct referrals to diagnostics such as x-rays, CT scans, ultrasound)?
  - Prompts around who should make the referral
- Are there any additional support mechanisms/external to the practice that need to be in place to help with promotion/diagnosis and referral?
- Any further issues or concerns you would like to raise about this work?

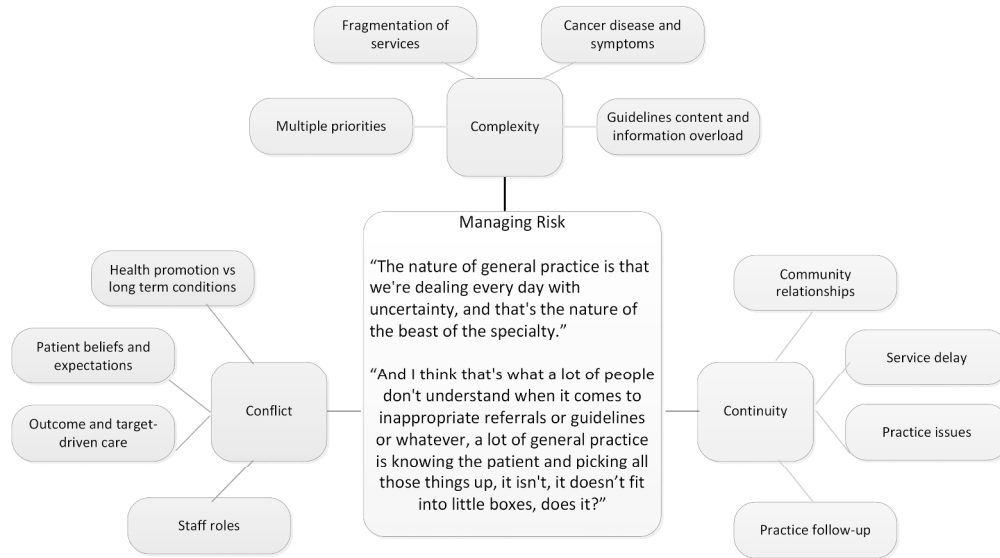

Figure 1: organising themes of complexity, continuity and conflict with their associated basic themes, centred around the global theme of managing risk in primary care  
233x130mm (300 x 300 DPI)

review only

# BMJ Open

## Managing risk in cancer presentation, detection and referral: a qualitative study of primary care staff views

|                                 |                                                                                                                                                                                                                                          |
|---------------------------------|------------------------------------------------------------------------------------------------------------------------------------------------------------------------------------------------------------------------------------------|
| Journal:                        | <i>BMJ Open</i>                                                                                                                                                                                                                          |
| Manuscript ID:                  | bmjopen-2014-004820.R2                                                                                                                                                                                                                   |
| Article Type:                   | Research                                                                                                                                                                                                                                 |
| Date Submitted by the Author:   | 19-May-2014                                                                                                                                                                                                                              |
| Complete List of Authors:       | Cook, Neil; University of Central Lancashire, School of Medicine and Dentistry<br>Thomson, Gillian; University of Central Lancashire, School of Health<br>Dey, Maria; University of Central Lancashire, School of Medicine and Dentistry |
| <b>Primary Subject Heading</b>: | Qualitative research                                                                                                                                                                                                                     |
| Secondary Subject Heading:      | Public health, General practice / Family practice                                                                                                                                                                                        |
| Keywords:                       | QUALITATIVE RESEARCH, PUBLIC HEALTH, Epidemiology < ONCOLOGY                                                                                                                                                                             |
|                                 |                                                                                                                                                                                                                                          |

SCHOLARONE™  
Manuscripts

Peer Review Only



1  
2  
3  
4  
5  
6  
7  
8 **Managing risk in cancer presentation, detection and referral: a qualitative study of**  
9 **primary care staff views**  
10  
11  
12  
13

14  
15  
16  
17 Neil Cook, Research Assistant, School of Medicine and Dentistry, University of Central  
18 Lancashire, Preston, England\*  
19  
20  
21

22  
23  
24 Gillian Thomson, Senior Research Fellow, School of Health, University of Central  
25 Lancashire, Preston, England  
26  
27  
28

29  
30 Paola Dey, Professor of Public Health Epidemiology, School of Medicine and Dentistry,  
31 University of Central Lancashire, Preston, England  
32  
33  
34  
35  
36  
37  
38  
39  
40  
41

42 \*corresponding author: Neil Cook, School of Medicine and Dentistry, Greenbank Building,  
43 University of Central Lancashire, Adelphi Street, Preston, England PR1 2HE  
44  
45  
46 Email: [NCook2@uclan.ac.uk](mailto:NCook2@uclan.ac.uk) Phone: 01772 893409  
47  
48  
49

50  
51 **Key Words:** primary health care, general practice, neoplasms, qualitative research, early  
52 detection of cancer.  
53  
54

55  
56  
57 Word count: abstract- 232, manuscript - 4,645  
58  
59  
60

## ABSTRACT

Objectives: In the UK, there have been a number of national initiatives to promote earlier detection and prompt referral of patients presenting to primary care with signs and symptoms of cancer. The aim of the study was to explore the experiences of a range of primary care staff in promoting earlier presentation, detection and referral of patients with symptoms suggestive of cancer.

Setting: Six primary care practices in North West England.

Participants: Thirty-nine primary care staff from a variety of disciplines took part in five group and four individual interviews.

Results: The global theme to emerge from the interviews was ‘managing risk’, which had three underpinning organising themes: ‘complexity’, relating to uncertainty of cancer diagnoses, service fragmentation and plethora of guidelines; ‘continuity’, relating to relationships between practice staff and their patients and between primary and secondary care; ‘conflict’ relating to policy drivers and staff role boundaries. A key concern of staff was that policymakers and those implementing cancer initiatives did not fully understand how risk was managed within primary care.

Conclusion: Primary care staff expressed a range of views and opinions on the benefits of cancer initiatives. National initiatives did not appear to wholly resolve issues in managing risk for all practitioners. Staff were concerned about the number of guidelines and priorities

1  
2  
3 they were expected to implement. These issues need to be considered by policymakers when  
4  
5 developing and implementing new initiatives.  
6  
7

## 8 9 **ARTICLE SUMMARY**

### 10 11 12 13 **Strengths and limitations of this study**

- 14  
15 • The study investigates the experiences of a range of primary care staff around  
16  
17 implementing initiatives for the earlier diagnosis of cancer.  
18  
19
- 20  
21 • The underlying concern in primary care is related to managing risk.  
22
- 23  
24 • The sample included a mix of practices with different practice characteristics and  
25  
26 included those known to be engaged in national and regional initiatives and those who  
27  
28 were less engaged.  
29
- 30  
31 • The sample was drawn from a single English region.  
32  
33  
34  
35  
36  
37  
38  
39  
40  
41  
42  
43  
44  
45  
46  
47  
48  
49  
50  
51  
52  
53  
54  
55  
56  
57  
58  
59  
60

## INTRODUCTION

Studies in the 1990s showed that UK cancer survival rates were worse than many other European countries, following which there has been two decades of concerted effort to expedite access to proven effective cancer treatments.[1] While there have been improvements in cancer survival latterly, the UK still lags behind other countries with similar health care systems, which may be partly due to later stage of disease at presentation.[2]

Both nationally and internationally, primary care is seen to have a key role in improving cancer survival by reducing delays in diagnosis through promoting earlier presentation and through earlier detection and referral of those with symptoms for further specialist assessment.[3, 4] In the UK, national campaigns extol those with symptoms to see their general practitioner earlier; there are national referral guidelines for suspected cancer and a national system for urgent referral from primary to secondary care (two-week waiting-time initiative).[5] While these appear to have contributed to improved survival, evidence also suggests that there may be further room for improvement:[6] there is practice variation in the use of the ‘two-week’ initiative and some patients are seen several times in primary care before referral.[7-9] A significant proportion of patients also present through emergency routes and have poorer survival.[10]

To further support primary care in the UK, resources were developed and/or disseminated by the Department of Health’s National Awareness and Early Diagnosis Initiative (NAEDI), established in 2008, and the Royal College of General Practitioners (RCGP) including: audit and significant events analysis tools,[7, 8] general practitioner (GP) level cancer profile data, safety netting recommendations and risk assessment tools.[11] Key initiatives have mainly

1  
2  
3 focused on GPs, but other members of the primary care team may have key roles: an area  
4  
5 which has been largely unexplored.  
6  
7

8  
9  
10 A number of international studies have been undertaken in attempts to understand the reasons  
11 behind delay in cancer diagnosis. Qualitative studies have mostly focussed on patient  
12 perspectives.[12-14] Only a few have explored primary care experiences and these have been  
13 mainly limited to decision-making processes or referral pathways [11, 15, 16] and from the  
14 perspective of the general practitioner.[3, 11, 15, 16] In order to understand how a range of  
15 initiatives across the patient pathway in primary care could be more effective and the role of  
16 other members of the practice team, we explored the experiences of a range of primary care  
17 staff in supporting earlier presentation, detection and referral of those with symptoms  
18 suggestive of cancer. The study was undertaken in one region of England, which at that time  
19 was covered by the Lancashire and South Cumbria Cancer Network (LSSCN).  
20  
21  
22  
23  
24  
25  
26  
27  
28  
29  
30  
31  
32  
33  
34  
35

## 36 **METHODS**

37  
38  
39  
40 This was a qualitative descriptive study utilising both individual and group-based interviews.  
41  
42 It aimed to recruit staff from six practices who were differentially engaged with the national  
43 awareness and early diagnosis of cancer agenda. GP practices within LSSCN were stratified  
44 into one of three groups at the end of June 2012. High engagers had participated in at least  
45 one of the following: RCGP cancer audit, attendance at a course on early diagnosis or face-  
46 to-face meetings to discuss GP cancer profiles and action planning. Medium engagers had  
47 attended at least one regional meeting about cancer awareness. Low engagers were not  
48  
49  
50  
51  
52  
53  
54  
55  
56  
57  
58  
59  
60

1  
2  
3 known to have engaged in any initiatives. Of 254 practices in the geographical area, there  
4  
5 were 51 high engagers, 69 medium engagers and 134 low engagers.  
6  
7

8  
9  
10 Within each group, a random sample of 10 practices were sent a letter about the study,  
11  
12 followed up with a phone call from the research team one week later. The initial aim was to  
13  
14 recruit at least two practices in each stratum. Due to low uptake within the medium and low  
15  
16 engager strata, these categories were merged and a random sample of a further 15 practices  
17  
18 sent letters. Practices were offered a choice of either group or individual interviews as it was  
19  
20 recognised that time constraints prevent some practice staff from taking part in group  
21  
22 interviews and some may feel uncomfortable discussing the issues with colleagues. Five  
23  
24 practices agreed to a group interview; with one group interview undertaken in each practice.  
25  
26 Individual interviews were the preferred method in only one practice: with four interviews  
27  
28 undertaken in this setting.  
29  
30  
31

32  
33  
34 The semi-structured, audio-recorded interviews, which were attended by two researchers,  
35  
36 occurred between September and October 2012. We recruited three practices in the high  
37  
38 stratum and three practices in the merged medium and low stratum (a mix of low and medium  
39  
40 engagers). The topic guide is outlined in Box 1. Thirty-nine participants took part in the  
41  
42 study; 35 took part in one of the five group interviews and four took part in individual  
43  
44 interviews. Job roles included GP (n=9), receptionist (n=7), nurse (n=6), manager (n=6),  
45  
46 secretary (n=5), health care assistant (n=3), medical student (n=2) and phlebotomist (n=1). In  
47  
48 each practice, GPs, other clinical staff and administrative staff were involved in the  
49  
50 interviews. Practice characteristics are shown in table 1.  
51  
52  
53  
54  
55  
56  
57  
58  
59  
60

Table 1: Practice and interview characteristics

| Practice characteristic | No. of practices |
|-------------------------|------------------|
| No of partners          |                  |
| 4 or more               | 3                |
| 3 or less               | 3                |
| Deprivation Quintile*   |                  |
| 5 or 4 (more deprived)  | 3                |
| 2 or 3                  | 3                |
| 1 (most affluent)       | 0                |
| Population Density**    |                  |
| <15%                    | 2                |
| 15 to 39%               | 2                |
| >=40%                   | 2                |

\*based on index of multiple deprivation of practice location 2010 (source: Department for Communities and Local Government, Indices of Deprivation 2010)

\*\* Person per hectare based on practice location (source: ONS Neighbourhood Statistics)

Further detail at practice level is not presented due to the level of confidentiality agreed with our participants.

The interviews took between 38 and 67 minutes to complete, and between four and eleven staff took part in each practice. All transcribed data were entered into NVivo 10 and analysed using a Thematic Network Analysis approach.[17] This involved an iterative and cyclical process of reading and analysis to identify basic, organising and global themes within the dataset. Analysis was undertaken by two authors (GT and NC) independently on six transcripts initially, followed by an in-depth discussion and consensual validation of key themes. A further cycle of independent and collaborative analysis was then undertaken on a further sub-set of transcripts to ensure rigour and authenticity of the themes generated. All thematic decisions were discussed with the third author (PD). The study was approved by the

1  
2  
3 University of Central Lancashire 'STEMH' ethics committee and individual written informed  
4  
5 consent was obtained from all participants.  
6  
7

## 8 9 **RESULTS**

10  
11  
12  
13  
14 Overall, practice staff were well aware of the two-week waiting-time initiative and had good  
15  
16 knowledge about the national 'Be Clear on Cancer' cancer awareness public campaigns, but  
17  
18 had less awareness about other initiatives specifically targeted at primary care. The key  
19  
20 global theme to emerge from the interviews related to 'managing risk' within primary care:  
21  
22

23  
24  
25 *"It's quite a tricky, nebulous area [...]. The nature of general practice is that we're*  
26  
27 *dealing every day with uncertainty..."* (Interview 6, Participant 3)  
28  
29

30  
31  
32 A key concern of staff was that policymakers and those implementing cancer initiatives did  
33  
34 not fully understand how risk was managed within primary care. Cancer was only one  
35  
36 priority and there was an abundance of initiatives for a variety of conditions which primary  
37  
38 care staff were expected to implement. Three underpinning organising themes (and  
39  
40 associated basic themes) of 'complexity', 'continuity' and 'conflict' highlighted the tensions  
41  
42 and difficulties that primary care face in managing the risk of early detection and referral for  
43  
44 cancer symptoms whilst dealing with complex symptoms and care systems, patient-led  
45  
46 factors and target-focused care. An overview of the organising and basic themes is presented  
47  
48 in figure 1. These themes are described and discussed, contextualised by participant quotes  
49  
50 below.  
51  
52

53  
54  
55  
56 **Complexity**  
57  
58  
59  
60



1  
2  
3 This theme highlighted the complexity of managing risk in early cancer diagnosis because of  
4  
5 external factors including cancer symptom differentiation and the restrictions imposed by  
6  
7 referral criteria; the multitude of services and professionals involved in diagnostic and  
8  
9 assessment services and the plethora of policies and initiatives targeted at primary care  
10  
11 practice.  
12

13  
14  
15  
16 *Cancer disease and symptoms:* Cancer diagnosis was an important priority area in primary  
17  
18 care but diagnosis presented complex challenges. Cancer was a rare diagnosis in primary  
19  
20 care although symptoms associated with cancer were common.  
21

22  
23  
24  
25 *“We get lots of sore throats, and yet we get one tonsillar cancer every three [years] so*  
26  
27 *sorting out the wheat from the chaff is a real challenge.” (Interview 3, Participant 3)*  
28

29  
30  
31  
32 These complexities of diagnosis were compounded by what were considered rigid referral  
33  
34 criteria, based on disease prevalence amongst those with symptoms, which led to cases being  
35  
36 ‘*bounced back*’ if they failed to meet diagnostic criteria. In attempts to manage what they  
37  
38 considered was a risk to patients, some participants said, on occasion, they had to ‘*fudge*’,  
39  
40 ‘*embellish*’ or ‘*bend-the-rules*’ to ensure assessment of patients for whom they had concerns:  
41  
42

43  
44  
45 *“Even though it says on the form, “don't fill out this form unless they tick any boxes”*  
46  
47 *but you find a box to tick, and usually for very good reason. And I think you'd only go*  
48  
49 *slightly over egging the presentation if you were pretty sure there was something*  
50  
51 *there, something going on.” (Interview 4, Participant 4)*  
52  
53  
54  
55  
56  
57  
58  
59  
60

1  
2  
3 *Fragmentation and access to diagnostic services:* Primary care staff expressed difficulties  
4  
5 accessing diagnostic services due to on-going service re-configurations and the involvement  
6  
7 of multiple agencies. This led to fragmentation in terms of staff not always knowing who, or  
8  
9 to which services, referrals could be made.  
10

11  
12  
13  
14 There were also some concerns about fragmented relationships between primary and  
15  
16 secondary care with several participants feeling frustrated by restricted access to diagnostics  
17  
18 for certain conditions. Some participants considered this was due to *'empire building'* by  
19  
20 professionals justifying and *'preserving'* their service by retaining ownership of who was  
21  
22 qualified to make referrals:  
23  
24

25  
26  
27 *"I can send people for a CT scan if I have a concern about them, for some conditions,*  
28  
29 *but not others. Well why not? I'm the one who's initiating the referral in the first*  
30  
31 *place. You trust me to initiate the referral to pick the patient and prepare them so that*  
32  
33 *you can come along and just arrange the scan and look at it."* (Interview 4,  
34  
35  
36 Participant 3)  
37  
38  
39

40  
41 Whilst some GPs wanted more direct access to diagnostics, this was not universal, and others  
42  
43 highlighted the need for *'training'* prior to referrals being made.  
44  
45  
46

47  
48 *Guidelines content and information overload:* Participants referred to the usefulness of  
49  
50 guidelines to help symptom differentiation and manage risk. Knowledge was felt to be  
51  
52 experientially derived and referral guidelines only considered useful for less experienced  
53  
54 doctors. Risk assessment tools were occasionally considered unnecessarily complex when  
55  
56  
57  
58  
59  
60

1  
2  
3 patients had ‘red flag’ symptoms and, as previously mentioned, sometimes restrictive for use  
4  
5 in primary care:  
6  
7  
8

9  
10 *“I mean, you see, from a GPs point of view, if somebody comes in who is fifty-five*  
11 *years of age, and passes blood in his stool, you need to exclude a cancer. Now, I don’t*  
12 *want to know how many percentage of those people pass blood in the motion will*  
13 *have cancer, or how many will have piles, or inflammatory bowel disease or what*  
14 *have you.”* (Interview 4, Participant 3)  
15  
16  
17  
18  
19

20  
21  
22  
23 Concerns were expressed about the number of guidelines available for different conditions  
24 and inconsistencies between different sources:  
25  
26  
27

28  
29 *“And that’s the problem ‘cause last year there was a big campaign, “if you have a*  
30 *cough for more than three weeks you need to go and see a doctor”, but NICE*  
31 *guidelines is six weeks.”* (Interview 6, Participant 4)  
32  
33  
34  
35  
36  
37

38  
39 Participants described how the ‘tsunami’ of new guidelines, care plans and initiatives meant it  
40 was difficult to keep up-to-date:  
41  
42  
43  
44

45 *“And I thought ‘that’s probably a squamous cell carcinoma. That needs a two-week*  
46 *wait referral’. Then, I actually checked the guidelines, the guidelines say that “it’s got*  
47 *to be over one centimetre and you’ve got to wait more than eight weeks really for it to*  
48 *grow” etcetera, etcetera [...] and those things will change on a regular basis. Now,*  
49 *how do you expect an entire network of primary care physicians to stay current with*  
50 *all those guidelines and apply them religiously?”* (Interview 2, Participant 3).  
51  
52  
53  
54  
55  
56  
57  
58  
59  
60

1  
2  
3  
4  
5 Continuity  
6

7 Practice staff expressed concern that a lack of continuity increased the risk of missing  
8 diagnoses and/or supporting the patient through a difficult period. This was highlighted  
9 through discussions about relationships between patients and clinicians; delays in information  
10 sharing across the primary and secondary care interface and patient follow-up after initial  
11 consultation.  
12  
13  
14  
15  
16  
17

18  
19  
20  
21 *Patient-practice relationships:* Continuity-of-carer could not always be achieved in practice,  
22 even though it was felt that patients preferred it and its absence was thought to possibly  
23 contribute to diagnostic delay:  
24  
25  
26  
27

28  
29  
30 *“People have been hopping around from one clinician to another and that, and you*  
31 *don't see the evolution of the story until it hits you in the face. Patients book on the*  
32 *day, they don't necessarily get in the person they normally see, they get in with the*  
33 *available, so that can disjoint things.” (Interview 3, Participant 4)*  
34  
35  
36  
37  
38  
39

40 Staff felt that smaller, rural practices had closer relationships with their patients and their  
41 community, which would lead to earlier consultation. However, others felt awareness of  
42 cancer deaths was heightened in close-knit communities, which could reinforce negative  
43 views towards cancer and cancer survivorship amongst the local population and delay access  
44 to services.  
45  
46  
47  
48  
49  
50

51  
52  
53  
54 *Primary care and secondary care interface:* Expedited assessment following GP referral of  
55 patients through the two-week wait initiative was perceived to work well by practice staff,  
56  
57  
58  
59  
60

1  
2  
3 but delays further on in the assessment process, and outside of primary care control, were felt  
4  
5 to put patients at risk again and exacerbated their concerns:  
6  
7  
8

9  
10 *“And, well, it's very difficult from our point of view, ‘cause we're saying, ‘look, you*  
11 *know this may be nothing serious, however, I want to refer you on the system, you'll*  
12 *get an appointment in two weeks”, and they do get seen, but then there's a massive*  
13 *delay, so, you know, then they're kinda all heightened up because they're thinking,*  
14 *“{whispered} the doctor thinks I've got cancer” and then nothing happens for ages,*  
15 *and it's really hard for the patients.”* (Interview 3, Participant 5)  
16  
17  
18  
19  
20  
21  
22  
23  
24

25 *Practice-based follow-up:* Patients themselves were also considered to cause delays if they  
26 failed to attend. Practices debated the extent to which they should chase these patients up and  
27 the risks if they did not:  
28  
29  
30  
31  
32  
33

34 *“In the back of their mind they know they should, but if they face the fact that they're*  
35 *going back, are they are going to be faced with something else? You also have to be*  
36 *responsible for the fact that if that doesn't stop, you must persist, and accept the fact*  
37 *that, if you don't, then you could, somewhere down the line end up with something so*  
38 *serious that it's only going to be palliative.”* (Interview 2, Participant 1)  
39  
40  
41  
42  
43  
44  
45  
46  
47

#### 48 Conflict

49  
50 Within this theme, managing risk was related to primary care focus on targets; conflicting  
51 opinions about the role of non-clinical staff and about the worries and tensions generated by  
52 cancer awareness campaigns.  
53  
54  
55  
56  
57  
58  
59  
60

1  
2  
3 *Prevention versus target driven care:* Primary care staff considered cancer a public health  
4  
5 priority but some felt that there was a tension between adopting preventative approaches in  
6  
7 the practice such as promoting cancer awareness and early presentation and the way that  
8  
9 primary care is currently funded through achieving specific targets mainly relating to the  
10  
11 management of long-term conditions (Quality and Outcomes Framework):  
12  
13

14  
15  
16 *“We’re not as good with public health, with local public health initiatives, as maybe*  
17  
18 *we should be necessarily. It’s just time to do things, and those things aren’t required*  
19  
20 *of our core business, and when you have a very detailed contract that tells you what*  
21  
22 *you will be paid for doing” (Interview 2, Participant 3)*  
23  
24  
25

26  
27 *Staff roles:* There were conflicting views around the role of other practice staff in managing  
28  
29 the risk of cancer detection and awareness, in particular with regard to reception staff. Some  
30  
31 staff viewed the reception role as a health advisor, whereas others perceived their role to be  
32  
33 purely administrative. Additionally, there were reservations about the ability of reception  
34  
35 staff to relay cancer messages and how the public might feel about receiving health  
36  
37 information from them:  
38  
39  
40  
41

42  
43 *“You’re passing clinical responsibility to people who are non-clinical. It’s alright for*  
44  
45 *patients to speak to them, and that’s fine, but, I’m not gonna use the receptionists as a*  
46  
47 *source of information [...]. I think anything clinical should be passed to the doctor*  
48  
49 *full stop. I don’t think there is any other role for the receptionist.” (Interview 4,*  
50  
51 *Participant 3)*  
52  
53  
54  
55  
56  
57  
58  
59  
60

1  
2  
3 There were also concerns about potential litigation issues if reception staff were to give  
4  
5 advice and how this could impact on the practice:  
6  
7

8  
9  
10 *“I think it's also worth mentioning at this point, because of our roles, how they are,*  
11 *we get a lot of patients not happy about us supplying information, because we're not*  
12 *allowed to diagnose, obviously for obvious reasons, but if you was to imply*  
13 *something, that could come back on us twice as hard because you'd implied*  
14 *something that could be wrong, and therefore it is now your fault.”* (Interview 1,  
15  
16  
17  
18  
19  
20  
21 Participant 1)  
22  
23

24  
25 A further issue associated with staff roles in helping to manage risk was the identified  
26  
27 benefits of having a chain of communication between all practice members. For example,  
28  
29 receptionists being able to ‘raise issues’ with the doctor if they know someone is coming in  
30  
31 who has symptoms the doctor should be aware of but the patient ‘may not say anything’. This  
32  
33 can also work the other way:  
34  
35

36  
37  
38 *“Patients that I worry about, I will leave messages. I'll mention to reception or*  
39 *mention to people that I want to follow them up.”* (Interview 6, Participant 3)  
40  
41  
42  
43  
44

45  
46 Others felt that the focus on the long-term conditions might provide opportunities for practice  
47  
48 nurses to be more involved as they were often seeing patients who might be at higher risk of  
49  
50 cancer because of their age, disease condition or lifestyle behaviours:  
51  
52

53  
54 *“Chronic disease, yeah, so diabetic, high blood pressure, chronic kidney disease,*  
55 *asthma, most patients will come and see the practice nurses for routine bloods, blood*  
56  
57  
58  
59  
60

1  
2  
3 *pressure, weight, everything like that. So often, GPs don't always see them, I mean*  
4  
5 *they do the medication reviews, but, we flag to them anything that we're worried*  
6  
7 *about.” (Interview 2, Participant 4)*  
8  
9

10  
11  
12 Some could also see a role for members of the wider practice team:

13  
14  
15  
16 *“We'd say 'well who are the district nurses already going out to?' You know, you can*  
17  
18 *work with your local pharmacists.” (Interview 2, Participant 2)*  
19  
20

21  
22  
23 *Cancer awareness:* Although cancer fear was commonly acknowledged, staff were divided as  
24  
25 to whether patients were afraid to consult the GP with cancer symptoms. Some felt that  
26  
27 unhealthy lifestyle choices contributed to patient reluctance to present with cancer symptoms:  
28  
29

30  
31  
32 *“The cancers where they feel that they may have contributed to it, like smoking, they*  
33  
34 *tend to ignore because they don't want to be told that it may be their fault in a certain*  
35  
36 *way, and they don't want to give up the lifestyle.” (Interview 6, Participant 4)*  
37  
38

39  
40  
41 Cancer awareness campaigns were felt to be important, even though those who presented to  
42  
43 the practice following the campaign were more likely to be those at least risk:  
44  
45

46  
47 *“It's the people who never come to the doctors that you want to hit, not the people*  
48  
49 *that were already coming in anyway, and they tend to be ones that see those adverts.*  
50  
51 *But then if you can get one person who wouldn't normally come in and you catch*  
52  
53 *them, then it's better.” (Interview 5, Participant 1)*  
54  
55  
56  
57  
58  
59  
60



1  
2  
3 Campaigns were also felt to create extra work for all practice members. There were  
4  
5 complaints that cancer awareness campaigns tend to run without consideration of other local  
6  
7 or national campaigns which may be running simultaneously which increased the risk that  
8  
9 practice capacity to safely respond to patients was compromised:  
10  
11

12  
13  
14 *“It's like it's alright saying putting in place to get them in, but it's the sheer volume,*  
15  
16 *isn't it? You can only cope with so much can't you?”* (Interview 5, Participant 1)  
17  
18  
19  
20  
21  
22

## 23 **DISCUSSION**

24  
25  
26  
27 This study provides insights into the experiences of primary care staff who manage patients  
28  
29 with symptoms associated with cancer. The overarching theme that emerged was the need to  
30  
31 manage risk so that cancer patients had a timely diagnosis and were assessed appropriately.  
32  
33 The associated subthemes of complexity, continuity and conflict highlighted the tensions and  
34  
35 difficulties faced by staff when attempting to manage these risks in modern practice.  
36  
37  
38  
39

40  
41 The study was small, descriptive and exploratory. However, it covered a diverse geographical  
42  
43 area and included practices with varying levels of engagement with awareness and early  
44  
45 diagnosis initiatives. We undertook stratified sampling of the practices to ensure we had a  
46  
47 balance of perspectives so as to better inform policymakers of the possible barriers and  
48  
49 drivers to the uptake of initiatives. The stratification was based on known engagement with a  
50  
51 range of national and regional initiatives to promote earlier presentation, detection and  
52  
53 referral of patients with symptoms suggestive of cancer available to the practices at that time.  
54  
55  
56  
57  
58  
59  
60

1  
2  
3 The findings of our study suggest that national initiatives did not appear to wholly resolve  
4 issues around managing risk for all practitioners. Rather, in some cases, these initiatives  
5 were felt to introduce inherent risks which staff had to find ways to overcome. For example,  
6 national cancer awareness campaigns were felt to be very important to encourage patients  
7 who would otherwise delay diagnosis. However, as these campaigns appeared to increase  
8 consultation rates from those at lesser risk, this was perceived to place additional burden on  
9 the practice.  
10  
11  
12  
13  
14  
15  
16  
17  
18  
19

20  
21 There were also concerns amongst our participants about practice-based initiatives. The  
22 International Cancer Benchmarking Partnership observed lower survival rates in Denmark  
23 and the UK compared to other countries in their study, and raised concerns about the role of  
24 primary care gatekeeping in delayed diagnosis.[2] This observation appears to be supported  
25 by a wider study of European countries which also demonstrated lower cancer survival in  
26 those with primary care based gatekeeper systems.[18] Primary care gatekeeping may reduce  
27 the burden on specialist care but may also contribute to diagnostic delay through the  
28 restriction of access to these services. In the UK, national referral guidelines and the two-  
29 week waiting-time initiative should help alleviate this problem for those with symptoms  
30 associated with cancer. Participants in our study considered that timely diagnosis was as an  
31 essential part of their role in cancer care. An Australian study had a similar finding,[16] but  
32 highlighted that the resources spent gaining timely access to specialist opinion were a major  
33 issue for their practitioners. In our study this was universally considered less of a problem  
34 because of the two-week waiting-time initiative, but concerns were expressed that lack of  
35 direct access to diagnostic investigations and poor communication between primary and  
36 secondary care put patients at risk of extended delays. Similar concerns were reported in a  
37 study undertaken in Ireland.[3] Some participants in our study felt that the referral criteria for  
38  
39  
40  
41  
42  
43  
44  
45  
46  
47  
48  
49  
50  
51  
52  
53  
54  
55  
56  
57  
58  
59  
60

1  
2  
3 the two-week waiting-time initiative were too restrictive. This led to practitioners, on  
4  
5 occasion, subverting the referral system to ensure that patients they considered were at risk,  
6  
7 but who did not fit the referral criteria, could be assessed in a timely manner. Such concerns  
8  
9 are not unfounded; one study has shown that 8% of patients felt by GPs to have cancer, but  
10  
11 who did not have symptoms which fit referral criteria for cancer, were subsequently  
12  
13 diagnosed with cancer.[19] This may be because the presenting signs and symptoms had a  
14  
15 lower predictive value for cancer than those included in the guidelines. Nevertheless, there is  
16  
17 high compliance with guidelines and some limited evidence that referral guidelines  
18  
19 contribute, in part, to diagnostic delay reduction.[6, 19]  
20  
21  
22  
23

24  
25 Diagnostic errors leading to primary care malpractice claims are common.[20] Researchers  
26  
27 suggest that although GPs are more likely to correctly diagnose patients with cancer than  
28  
29 miss cases, there are a disproportionate number of deaths amongst the latter.[21,22]  
30  
31 Diagnostic complexity is compounded by the frequency of consultations for symptoms  
32  
33 associated with cancer,[22, 23] a fear highlighted by practitioners in this study. A study in  
34  
35 Norway, which followed up patients presenting with cancer warning signs to their GP,  
36  
37 suggests that patients with cancer may be missed if multiple warning signs and symptoms are  
38  
39 not considered.[22] Retrospective studies of practice-based data have identified  
40  
41 combinations of warning signs and symptoms which may be associated with increasing  
42  
43 likelihood of cancer.[24-25] These have been used to inform risk assessment tools to aid  
44  
45 decision-making, with algorithms and probabilities of risk based on demographic  
46  
47 characteristics, lifestyle factors, symptoms and/or attendance frequency.[11] Some have been  
48  
49 disseminated nationally, and there is evidence from both quantitative and qualitative studies  
50  
51 that they affect GPs' decisions to refer.[11] However, in our study, some participants had  
52  
53 similar concerns about these tools as they did about guidelines. A recent analysis of  
54  
55  
56  
57  
58  
59  
60

1  
2  
3 significant event audits in lung cancer highlighted how cancer can mimic other diagnoses and  
4 have atypical presentation.[7] Guidelines and risk assessment tools are analytical tools, and  
5  
6 although statistical probabilities are based on uncertainty, some participants in our study felt  
7 they may introduce a level of certainty which fails to encapsulate practitioners' tacit concerns  
8 about patients. Previous work in primary care decision-making has emphasised the analytical  
9 over the experiential, but recent research , including in cancer diagnosis, suggests that  
10 experiential knowledge may have a role and may be more responsive to the patient as a  
11 person.[15, 26-28] Others have found that better diagnostic decisions about urgent referrals  
12 appear to be made by older doctors [23] and, as commented on by some of our participants,  
13 that guidelines and risk assessment tools may be more useful for newer practitioners who  
14 have yet to develop problem solving strategies.[29]  
15  
16  
17  
18  
19  
20  
21  
22  
23  
24  
25  
26  
27  
28

29 It has also been observed that, unlike in acute care, decision-making in primary care partly  
30 involves an understanding of the patient context and perspective.[30] Our study participants  
31 highlighted concerns that lack of continuity of carer may lead to diagnostic delays. Relational  
32 continuity was felt to be a particular problem in larger practices and urban settings. Other  
33 studies suggest that fragmentation of primary care and shorter consultation times has led to a  
34 lack of continuity-of-care or carer, which may hinder early diagnosis as cancer presentation  
35 can be complex in those with co-morbidities.[16, 31, 32] In a qualitative study of lung cancer  
36 patients in New Zealand, patients felt that not always seeing the same GP could lead to delays  
37 in diagnosis due to poor follow up.[33] In a study in Denmark, the authors suggest that  
38 perceived lack of accessibility and doctor-patient relationship were associated with patient  
39 delay in seeking advice about cancer symptoms.[34] Others have found that confidence and  
40 trust in a doctor were more important predictors of cancer detection than ease of access and  
41 choice of preferred doctor.[35]  
42  
43  
44  
45  
46  
47  
48  
49  
50  
51  
52  
53  
54  
55  
56  
57  
58  
59  
60

1  
2  
3  
4  
5 In our study, participants highlighted how other practice team members, such as nurses who  
6 are in more regular contact with patients with long-term conditions, could raise symptom  
7 awareness or be more alert to symptoms suggestive of cancer. In the US and Canada, patient  
8 navigators are being used to support patients through the complex systems found in cancer  
9 management and care.[36] It has also been suggested that these roles could be extended to  
10 support patients during the diagnostic, referral and assessment processes and ensure  
11 appropriate follow up of investigations.[37] In our study, some staff felt that receptionists  
12 could act as navigators in terms of directing patients with symptoms to see the GP. Low  
13 levels of knowledge about some cancer symptoms has been demonstrated in non-medical  
14 staff.[38] However, our study highlighted that professional boundaries and concerns about  
15 litigation might impede such initiatives. Disclosures or discussions of diagnostic issues  
16 within a public reception location also raised ethical concerns. Research within primary care  
17 suggests that facilitation of communities of practice and interdisciplinary knowledge sharing  
18 may help to identify the role of other practice team members in promoting earlier cancer  
19 presentation and diagnosis;[39] although training needs should be addressed.[38]  
20  
21  
22  
23  
24  
25  
26  
27  
28  
29  
30  
31  
32  
33  
34  
35  
36  
37  
38  
39  
40

41 This study has highlighted that a 'one-size-fits-all' approach to implementing initiatives is  
42 unlikely to succeed as practitioners expressed a range of views and opinions on the benefits  
43 of different initiatives. Lack of implementation of initiatives in primary care is not always  
44 because of resistance to the initiatives themselves, but sometimes because of the sheer  
45 number across a range of priority areas that practices are expected to implement, often  
46 simultaneously. Policymakers should consider more carefully how these impact on primary  
47 care, how they can be embedded into practice systems and emphasise and exploit synergies  
48 with other disease conditions.  
49  
50  
51  
52  
53  
54  
55  
56  
57  
58  
59  
60

1  
2  
3  
4  
5 For there to be greater success of initiatives aimed at promoting earlier presentation, detection  
6 and referral in primary care, there needs to be further work on understanding how primary  
7 care manage risk in the face of inherent uncertainty, organisational changes and competing  
8 priorities.  
9  
10  
11  
12

13  
14  
15  
16  
17  
18 **ACKNOWLEDGEMENTS:** Our thanks to the practices who participated in this study and  
19 to the staff of the Lancashire and South Cumbria Cancer Network who assisted us.  
20  
21  
22

23  
24  
25 **COMPETING INTERESTS:** PD was public health lead for LSCCN and NC is part-funded  
26 by a grant from LSCCN; PD was also funded by LSCCN to undertake evaluative work.  
27  
28  
29

30  
31  
32 **FUNDING:** This work was supported by Lancashire and South Cumbria Cancer Network  
33 (LSCCN) as part of the National Cancer Awareness and Early Detection initiative (NAEDI)  
34 funding 'cancer networks supporting primary care'.  
35  
36  
37  
38

#### 39 40 **CONTRIBUTIONS:**

41  
42 NC recruited participants, carried out interviews, transcribed the interviews, coded the  
43 transcripts, contributed to the development of the coding framework, and contributed to the  
44 writing of the manuscript.  
45  
46  
47

48  
49 GT carried out interviews, coded the transcripts, contributed to the development of the coding  
50 framework and contributed to the writing of the manuscript.  
51  
52

53  
54 PD designed the study, collated practice engagement data, contributed to the development of  
55 the coding of the framework and contributed to the writing of the manuscript.  
56  
57  
58  
59  
60

1  
2  
3  
4  
5 **DATA SHARING:** No further data are available  
6  
7  
8  
9

10 **REFERENCES**

- 11  
12 1. Haward R. The Calman-Hine report: a personal retrospective on the UK's first  
13 comprehensive policy on cancer services. *The Lancet Oncology*. 2006;7(4):336-46.  
14  
15 2. Coleman MP, Foreman D, Bryant H, et al. Cancer survival in Australia, Canada,  
16 Denmark, Norway, Sweden, and the UK, 1995—2007 (the International Cancer  
17 Benchmarking Partnership): an analysis of population-based cancer registry data. *The*  
18 *Lancet*. 2011;377:127–38. doi:10.1016/S0140-6736(10)62231-3.  
19  
20 3. Daly H, Collins C. Barriers to early diagnosis of cancer in primary care: a needs  
21 assessment of GPs. *Ir Med J*. 2007; 100(10):624-26  
22  
23 4. Ingebrigsten SG, Scheel BI, Hart B, et al. Frequency of ‘warning signs of cancer’ in  
24 Norwegian general practice, with prospective recording of subsequent cancer. *Fam*  
25 *Pract*. 2013;30:153-160  
26  
27 5. National Institute for Clinical Excellence. Clinical Guideline 27. Referral guidelines  
28 for suspected cancer. 2005.  
29 <http://www.nice.org.uk/nicemedia/live/10968/29814/29814.pdf> accessed 3/1/2014.  
30  
31 6. Neal RD, Din NU, Hamilton W, et al. Comparison of cancer diagnostic intervals  
32 before and after implementation of NICE guidelines: analysis of data from the UK  
33 General Practice Research Database. *Br J Cancer*. 2014;110(3):584-92.  
34 doi:10.1038/bjc.2013.791. 4.  
35  
36 7. Mitchell ED, Rubin G, MacLeod U. Understanding diagnosis of lung cancer in  
37 primary care: qualitative synthesis of significant event audit reports. *Br J Gen Pract*.  
38 2013;63(606):e37-46. doi:10.3399/bjgp13X660760.  
39  
40  
41  
42  
43  
44  
45  
46  
47  
48  
49  
50  
51  
52  
53  
54  
55  
56  
57  
58  
59  
60

- 1  
2  
3 8. Royal College of General Practitioners. Clinical Innovation and Research Centre.  
4  
5 National Audit of Cancer Diagnosis in Primary Care. 2011.  
6  
7 [http://www.rcgp.org.uk/news/2011/november/~media/Files/News/National\\_Audit\\_of](http://www.rcgp.org.uk/news/2011/november/~media/Files/News/National_Audit_of_Cancer_Diagnosis_in_Primary-Care.ashx)  
8  
9 [\\_Cancer\\_Diagnosis\\_in\\_Primary-Care.ashx](http://www.rcgp.org.uk/news/2011/november/~media/Files/News/National_Audit_of_Cancer_Diagnosis_in_Primary-Care.ashx). accessed 03/01/2014.  
10
- 11 9. Meechan D, Gildea C, Hollingworth L, et al. Variation in use of the 2-week referral  
12 pathway for suspected cancer: A cross-sectional analysis. *Br J Gen Pract.* 2012;  
13 62(602):e590–97. doi:10.3399/bjgp12X654551.  
14
- 15 10. Elliss-Brookes L, McPhail S, Ives A, et al. Routes to diagnosis for cancer -  
16 determining the patient journey using multiple routine data sets. *Br J Cancer.*  
17 2012;107(8):1220-26. doi:10.1038/bjc.2012.408.  
18
- 19 11. Hamilton W, Green T, Martins T et al. Evaluation of risk assessment tools for  
20 suspected cancer in general practice: a cohort study. *Br J Gen Pract.*  
21 2013;63(606):e30-36. doi:10.3399/bjgp13X660751.  
22
- 23 12. Emery JD, Walter FM, Gray V, et al. Diagnosing cancer in the bush: a mixed-methods  
24 study of symptom appraisal and help-seeking behaviour in people with cancer from  
25 rural Western Australia. *Fam Pract.* 2013 Jun;30(3):294-301.doi:  
26 10.1093/fampra/cms087  
27
- 28 13. Pedersen AF, Hansen RP, Vedsted P. Patient delay in colorectal cancer patients:  
29 associations with rectal bleeding and thoughts about cancer. *PLoS One.* 2013;Jul  
30 22;8(7):e69700.doi: 10.1371/journal.pone.0069700  
31
- 32 14. Marlow LA, McGregor LM, Nazroo JY, et al. Facilitators and barriers to help-seeking  
33 for breast and cervical cancer symptoms: a qualitative study with an ethnically diverse  
34 sample in London. *Psychooncology.* 2013;Dec 19.doi:10.1002/pon.3464  
35  
36  
37  
38  
39  
40  
41  
42  
43  
44  
45  
46  
47  
48  
49  
50  
51  
52  
53  
54  
55  
56  
57  
58  
59  
60



- 1  
2  
3 15. Johansen ML, Holtedahl KA, Rudebeck CE. How does the thought of cancer arise in a  
4  
5 general practice consultation? Interviews with GPs. *Scand J Prim Health Care*.  
6  
7 2012;30(3):135-40. doi:10.3109/02813432.2012.688701.  
8  
9  
10 16. Mitchell GK, Burridge LH, Colquist SP, et al. General Practitioners' perceptions of  
11  
12 their role in cancer care and factors which influence this role. *Health Soc Care*  
13  
14 *Community*. 2012; 20(6):607-16. doi:10.1111/j.1365-2524.2012.01075.x  
15  
16  
17 17. Attride-Stirling J. Thematic networks: an analytic tool for qualitative research.  
18  
19 *Qualitative Research*. 2001;1(3):385-405. doi:10.1177/146879410100100307.  
20  
21 18. Vedsted P and Olesen F. Are the serious problems in cancer survival partly rooted in  
22  
23 gatekeeper principles? An ecologic study. *Br J Gen Pract*.  
24  
25 2011;DOI:10.3399/bjgp11X588484.  
26  
27  
28 19. Baughan P, Keatings J, O'Neill B. Urgent suspected cancer referrals from general  
29  
30 practice: audit of compliance with guidelines and referral outcomes. *Br J Gen Pract*.  
31  
32 2011; doi:10.3399/bjgp11X606591.  
33  
34  
35 20. Wallace E, Lowry J, Smith SM, et al. The epidemiology of malpractice claims in  
36  
37 primary care: a systematic review. *BMJ Open*. 2013;3:e002929.  
38  
39 doi:10.1136/bmjopen-2013-002929.  
40  
41 21. Wallis K, Dovey S. No fault compensation for treatment injury in New Zealand:  
42  
43 identifying threats to patient safety in primary care. *BMJ Quality Safety*.  
44  
45 2011;20(7):587-91. doi: 10.1136/bmjqs.2010.0476906.  
46  
47  
48 22. Scheel BI, Ingebrigsten SG, Thorsen T, et al. Cancer suspicion in general practice: the  
49  
50 role of symptoms and patient characteristics, and their association with subsequent  
51  
52 cancer. *Br J Gen Pract*. 2013;doi:10.3399/bjgp13X671614  
53  
54  
55  
56  
57  
58  
59  
60

- 1  
2  
3 23. Jiwa M, Gordon M, Arnet H, et al. Referring patients to specialists: a structured  
4 vignette survey of Australian and British GPs. *BMC Fam Pract.* 2008; 9:2.doi:  
5 10.1186/1471-2296-9-2.  
6  
7  
8  
9  
10 24. Emery J. Editorial: Assessment of cancer risk in men and women. *Br J Gen Pract.*  
11 2013;63(606):4-5.doi:10.3399/bjgp13X660607.  
12  
13  
14 25. Hamilton W. The CAPER studies: five case-control studies aimed at identifying and  
15 quantifying the risk of cancer in symptomatic primary care patients. *Br J*  
16 *Cancer.*2009;101: S80-S86 doi:10.1038/sj.bjc.6605396  
17  
18  
19  
20  
21 26. André M, Andén A, Borgquist L, et al. GPs' decision-making-perceiving the patient as  
22 a person or a disease. *BMC Fam Pract.* 2012;13:38. doi:10.1186/1471-2296-13-38.  
23  
24  
25 27. Stolper E, Van de Wiel M, Van Royen P, et al. Gut feelings as a third track in general  
26 practitioners' diagnostic reasoning. *J Gen Intern Med.* 2011;26(2):197-203.  
27  
28  
29  
30  
31  
32 28. Zwolsman S, te Pas E, Hooft L, et al. Barriers to GPs' use of evidence-based medicine:  
33 a systematic review. *Br J Gen Pract.* 2012;62(600):e511-21. doi:  
34 10.3399/bjgp12X652382.  
35  
36  
37  
38  
39 29. Salah A, Hassan A. Cognitive schemes and strategies in diagnostic and therapeutic  
40 decision making: a primer for trainees. *Perspect Med Educ.* 2013; 2:321-31.  
41  
42  
43  
44  
45  
46 30. O'Riordan M, Dahinden A, Aktürk Z, et al. Dealing with uncertainty in general  
47 practice: an essential skill for the general practitioner. *Qual Prim Care.* 2011;19:175-  
48 81.  
49  
50  
51  
52 31. Brindle L, Pope C, Corner J, et al. Eliciting symptoms interpreted as normal by  
53 patients with early lung cancer. *BMJ Open.* 2012;2:e001977. doi:10.1136/bmjopen-  
54 2012-001977.  
55  
56  
57  
58  
59  
60

- 1  
2  
3 32. Round T, Steed L, Shankleman J, et al. Primary care delays in diagnosing cancer: what  
4 is causing them and what can we do about them? *J R Soc Med*. 2013;106(11):437-40.  
5  
6 doi:10.1177/0141076813504744.  
7  
8  
9  
10 33. Walton L, McNeill R, Stevens W, et al. Patient perceptions of barriers to the early  
11 diagnosis of lung cancer and advice for health service improvement. *Fam Pract*.  
12  
13 2013;30:439-44 doi:10.1093/fampra/cmt001  
14  
15  
16 34. Hansen RP, Vedsted P, Sokolowsk I, et al. General practitioner characteristics and  
17 delay in cancer diagnosis: a population-based cohort study. *BMC Fam Pract*. 2011;  
18  
19 12:100  
20  
21  
22  
23 35. Rogers S, Gildea C, Meechan D, et al. Access, continuity of care and consultation  
24 quality: which best predicts urgent cancer referrals from general practice? *J Public*  
25  
26 *Health (Oxf)*. 2014 Jan 23. [Epub ahead of print]  
27  
28  
29  
30 36. Dohan D, Schrag D. Using navigators to improve care of underserved patients.  
31  
32 *Cancer*. 2005;104:848-55. doi:10.1002/cncr.21214.  
33  
34 37. Lee J-H, Fulp W, Wells KJ, et al. Effect of patient navigation on time to diagnostic  
35 resolution among patients with colorectal cancer-related abnormalities. *J Canc Educ*.  
36  
37 2014;29:144-50  
38  
39  
40 38. Cook N, Hart A, Nuttall K, et al. A telephone survey of cancer awareness among  
41 frontline staff: informing training needs. *Br J Cancer*. 2011;105(3):340-45.  
42  
43  
44 doi:10.1038/bjc.  
45  
46  
47 39. Kislov R, Walshe K, Harvey G. Managing boundaries in primary care service  
48 improvement: a developmental approach to communities of practice. *Implement Sci*.  
49  
50 2012;7:97. doi:10.1186/1748-5908-7-97.  
51  
52  
53  
54  
55  
56  
57  
58  
59  
60

1  
2  
3  
4  
5  
6  
7  
8  
9  
10  
11  
12  
13  
14  
15  
16  
17  
18  
19  
20  
21  
22  
23 **Figure 1: organising themes of complexity, continuity and conflict with their associated**  
24 **basic themes, centred around the global theme of managing risk in primary care**  
25  
26  
27  
28  
29  
30  
31  
32  
33  
34  
35  
36  
37  
38  
39  
40  
41  
42  
43  
44  
45  
46  
47  
48  
49  
50  
51  
52  
53  
54  
55  
56  
57  
58  
59  
60

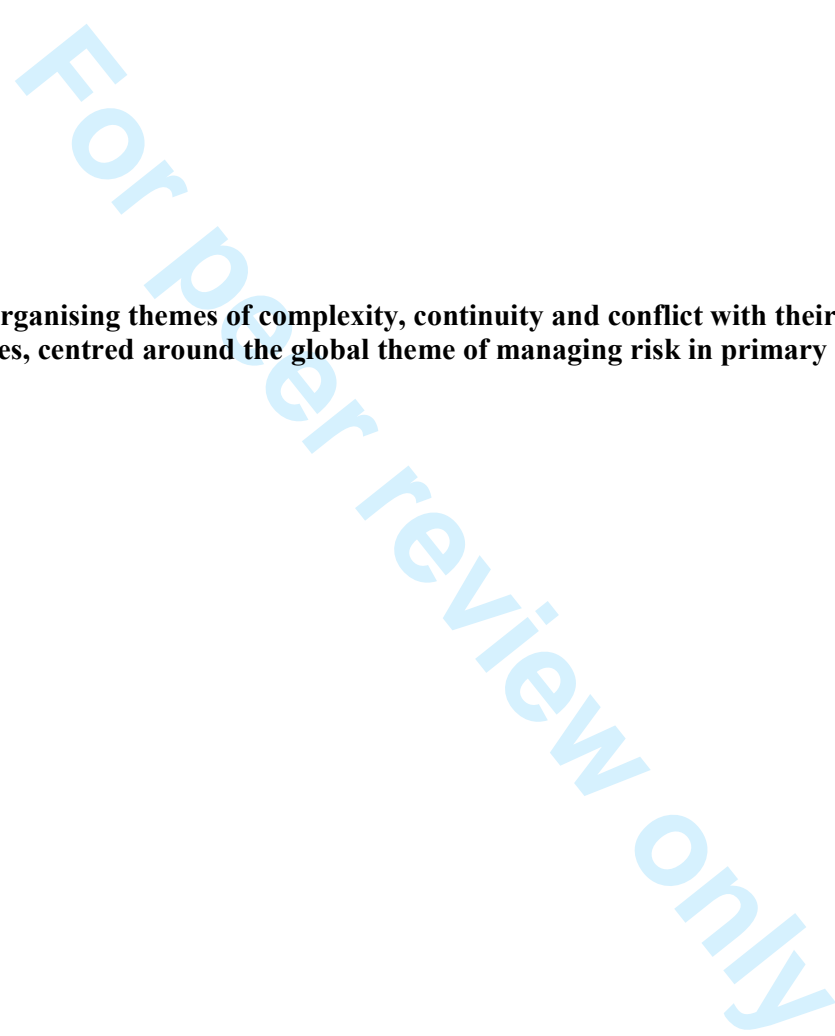

## Box 1: Semi-structured interview schedule

- Why do you think people with symptoms suggestive of cancer do not present, get seen or diagnosed or referred earlier?
- What do you know about the initiatives that concern the earlier presentation, diagnosis and referral of cancer symptoms?
  - Prompts around specific tools/initiatives/referral criteria
- Have you accessed any local training events concerning the identification, referral of cancer patients?
  - Prompts around specific training attended, and how learning is usually undertaken
- Overall, what is working well in terms of the implementation and use of these initiatives?
- Overall, have you experienced any/or what do you consider to be the main barriers in the implementation/access/use of these various initiatives?
- Are there any practice based issues that may affect the early identification and referral for cancer patients?
  - Prompts around staff and practice issues, communication, administration
- Overall, what do you think local practices could do to help promote and diagnose cancer symptoms?
  - Prompts around team roles and other practice issues
- Do you know about the Lancashire and South Cumbria Cancer Network and what their role is?
  - Prompts around extent of engagement, attitudes and areas for improvement
- What is your opinion concerning the forthcoming ‘access to diagnostics’ initiative (initiative for practices to make direct referrals to diagnostics such as x-rays, CT scans, ultrasound)?
  - Prompts around who should make the referral
- Are there any additional support mechanisms/external to the practice that need to be in place to help with promotion/diagnosis and referral?
- Any further issues or concerns you would like to raise about this work?

1  
2  
3  
4  
5  
6  
7  
8  
9  
10  
11 **Managing risk in cancer presentation, detection and referral: a qualitative study of**  
12 **primary care staff views**  
13  
14

15  
16  
17  
18  
19 Neil Cook, Research Assistant, School of Medicine and Dentistry, University of Central  
20 Lancashire, Preston, England\*

21  
22  
23  
24  
25 Gillian Thomson, Senior Research Fellow, School of Health, University of Central  
26 Lancashire, Preston, England

27  
28  
29  
30  
31 Paola Dey, Professor of Public Health Epidemiology, School of Medicine and Dentistry,  
32 University of Central Lancashire, Preston, England

33  
34  
35  
36  
37  
38  
39  
40 \*corresponding author: Neil Cook, School of Medicine and Dentistry, Greenbank Building,  
41 University of Central Lancashire, Adelphi Street, Preston, England PR1 2HE  
42  
43 Email: [NCook2@uclan.ac.uk](mailto:NCook2@uclan.ac.uk) Phone: 01772 893409  
44  
45

46  
47  
48 **Key Words:** primary health care, general practice, neoplasms, qualitative research, early  
49 detection of cancer.  
50

51  
52  
53  
54 | Word count: abstract- 232, manuscript - [4,504,645](#)  
55

**ABSTRACT**

Objectives: In the UK, there have been a number of national initiatives to promote earlier detection and prompt referral of patients presenting to primary care with signs and symptoms of cancer. The aim of the study was to explore the experiences of a range of primary care staff in promoting earlier presentation, detection and referral of patients with symptoms suggestive of cancer.

Setting: Six primary care practices in North West England.

Participants: Thirty-nine primary care staff from a variety of disciplines took part in five group and four individual interviews.

Results: The global theme to emerge from the interviews was 'managing risk', which had three underpinning organising themes: 'complexity', relating to uncertainty of cancer diagnoses, service fragmentation and plethora of guidelines; 'continuity', relating to relationships between practice staff and their patients and between primary and secondary care; 'conflict' relating to policy drivers and staff role boundaries. A key concern of staff was that policymakers and those implementing cancer initiatives did not fully understand how risk was managed within primary care.

Conclusion: Primary care staff expressed a range of views and opinions on the benefits of cancer initiatives. National initiatives did not appear to wholly resolve issues in managing risk for all practitioners. Staff were concerned about the number of guidelines and priorities

1  
2  
3  
4  
5  
6 they were expected to implement. These issues need to be considered by policymakers when  
7  
8 developing and implementing new initiatives.  
9

## 10 11 12 **ARTICLE SUMMARY** 13

### 14 15 16 **Strengths and limitations of this study** 17

- 18 • The study investigates the experiences of a range of primary care staff around  
19 implementing initiatives for the earlier diagnosis of cancer.  
20
- 21 • The underlying concern in primary care is related to managing risk.  
22
- 23 • The sample included a mix of practices with different practice characteristics and  
24 included those known to be engaged in national and regional initiatives and those who  
25 were less engaged.  
26
- 27 • The sample was drawn from a single English region.  
28  
29  
30  
31  
32  
33  
34  
35  
36  
37  
38  
39  
40  
41  
42  
43  
44  
45  
46  
47  
48  
49  
50  
51  
52  
53  
54  
55  
56  
57  
58  
59  
60



## INTRODUCTION

Studies in the 1990s showed that UK cancer survival rates were worse than many other European countries, following which there has been two decades of concerted effort to expedite access to proven effective cancer treatments.[1] While there have been improvements in cancer survival latterly, the UK still lags behind ~~many~~ other countries with similar health care systems, which may be partly due to later stage of disease at presentation. [2]

Both nationally and internationally, primary care is seen to have a key role in improving cancer survival by reducing delays in diagnosis through promoting earlier presentation and through earlier detection and referral of those with symptoms for further specialist assessment.[3, 4] In the UK, national campaigns extol those with symptoms to see their general practitioner earlier; there are national referral guidelines for suspected cancer and a national system for urgent referral from primary to secondary care (two-week waiting-time initiative).[5] While these appear to have contributed to improved survival However, evidence also suggests that there may be further room for improvement:[6] there is practice variation in the use of the ‘two-week’ initiative and some patients are seen several times in primary care before referral.[7-9] A significant proportion of patients also present through emergency routes and have poorer survival.[10]

To further support primary care in the UK, resources were developed and/or disseminated by the Department of Health’s National Awareness and Early Diagnosis Initiative (NAEDI), established in 2008, and the Royal College of General Practitioners (RCGP) including: audit and significant events analysis tools,[7, 8] general practitioner (GP) level cancer profile data,

1  
2  
3  
4  
5  
6  
7 safety netting recommendations and risk assessment tools.[11] Key initiatives have mainly  
8 focused on GPs, but other members of the primary care team may have key roles: an area  
9 which has been largely unexplored.  
10  
11

12  
13  
14 A number of international studies have been undertaken in attempts to understand the reasons  
15 behind delay in cancer diagnosis. Qualitative studies have mostly focussed on patient  
16 perspectives.[12-14] Only a few have explored primary care experiences and these have been  
17 mainly limited to decision-making processes or referral pathways [11, 15, 16] and from the  
18 perspective of the general practitioner.-[3, 11, 15, 16] In order to understand how a range of  
19 initiatives across the patient pathway in primary care could be more effective and the role of  
20 other members of the practice team, we explored the experiences of a range of primary care  
21 staff in supporting earlier presentation, detection and referral of those with symptoms  
22 suggestive of cancer. The study was undertaken in one region of England, which at that time  
23 was covered by the Lancashire and South Cumbria Cancer Network (LSCCN).  
24  
25  
26  
27  
28  
29  
30  
31  
32  
33  
34  
35  
36

## 37 **METHODS**

38  
39  
40  
41 This was a qualitative descriptive study utilising both individual and group-based interviews.  
42  
43 It aimed to recruit staff from six practices who were differentially engaged with the national  
44 awareness and early diagnosis of cancer agenda. GP practices within LSCCN were stratified  
45 into one of three groups at the end of June 2012. High engagers had participated in at least  
46 one of the following: RCGP cancer audit, attendance at a course on early diagnosis or face-  
47 to-face meetings to discuss GP cancer profiles and action planning. Medium engagers had  
48 attended at least one regional meeting about cancer awareness. Low engagers were not  
49  
50  
51  
52  
53  
54  
55  
56  
57  
58  
59  
60

1  
2  
3  
4  
5  
6  
7 known to have engaged in any initiatives. Of 254 practices in the geographical area, there  
8  
9 were 51 high engagers, 69 medium engagers and 134 low engagers.

10  
11  
12 Within each group, a random sample of 10 practices were sent a letter about the study,  
13  
14 followed up with a phone call from the research team one week later. The initial aim was to  
15  
16 recruit at least two practices in each stratum. Due to low uptake within the medium and low  
17  
18 engager strata, these categories were merged and a random sample of a further 15 practices  
19  
20 sent letters. Practices were offered a choice of either group or individual interviews as it was  
21  
22 recognised that time constraints prevent some practice staff from taking part in group  
23  
24 interviews and some may feel uncomfortable discussing the issues with colleagues. [Five](#)  
25  
26 [practices agreed to a group interview; with one group interview was undertaken in each](#)  
27  
28 [practice.](#) Individual interviews were the preferred method in only one practice: [with four](#)  
29  
30 [interviews were undertaken in this setting practice.](#)

31  
32 ~~Interviews (group and individual) were held on only one occasion in each practice.~~

33  
34  
35  
36 ~~Six practices agreed to take part in~~ The semi-structured, audio-recorded interviews, which  
37  
38 were attended by two researchers, [occurred](#) between September and October 2012. We  
39  
40 recruited three practices in the high stratum and three practices in the merged medium and  
41  
42 low stratum (a mix of low and medium engagers). The topic guide is outlined in Box 1.

43  
44 Thirty-nine participants took part in [group \(n=5\) or individual \(n=4\) the study; 35 took part in](#)  
45  
46 [one of the five group interviews and four took part in individual](#) interviews. Job roles  
47  
48 included GP (n=9), receptionist (n=7), nurse (n=6), manager (n=6), secretary (n=5), health  
49  
50 care assistant (n=3), medical student (n=2) and phlebotomist (n=1). [Within In each practice,](#)  
51  
52 [GPs, other clinical staff and administrative staff were involved in the interviews.](#) Practice  
53  
54 characteristics are shown in table 1.

Table 1: Practice and interview characteristics

| Practice characteristic | No. of practices |
|-------------------------|------------------|
| No of partners          |                  |
| 4 or more               | 3                |
| 3 or less               | 3                |
| Deprivation Quintile*   |                  |
| 5 or 4 (more deprived)  | 3                |
| 2 or 3                  | 3                |
| 1 (most affluent)       | 0                |
| Population Density**    |                  |
| <15%                    | 2                |
| 15 to 39%               | 2                |
| >=40%                   | 2                |

\*based on index of multiple deprivation of practice location 2010 (source: Department for Communities and Local Government, Indices of Deprivation 2010)

\*\* Person per hectare based on practice location (source: ONS Neighbourhood Statistics)

[Further detail at practice level is not presented due to the level of confidentiality agreed with our participants.](#)

~~[we are unable to present further detail at practice level.](#)~~

The interviews took between 38 and 67 minutes to complete, and between four and eleven staff took part in each practice. All transcribed data were entered into NVivo 10 and analysed using a Thematic Network Analysis approach.[17] This involved an iterative and cyclical process of reading and analysis to identify basic, organising and global themes within the dataset. Analysis was undertaken by two authors (GT and NC) independently on six transcripts initially, followed by an in-depth discussion and consensual validation of key themes. A further cycle of independent and collaborative analysis was then undertaken on a further sub-set of transcripts to ensure rigour and authenticity of the themes generated. All thematic decisions were discussed with the third author (PD). The study was approved by the

1  
2  
3  
4  
5  
6  
7 University of Central Lancashire 'STEMH' ethics committee and individual written informed  
8 consent was obtained from all participants.  
9

## 10 11 12 **RESULTS** 13

14  
15  
16 Overall, practice staff were well aware of the two-week waiting-time initiative and had good  
17 knowledge about the national 'Be Clear on Cancer' cancer awareness public campaigns, but  
18 had less awareness about other initiatives specifically targeted at primary care. The key  
19 global theme to emerge from the interviews related to 'managing risk' within primary care:  
20  
21  
22  
23

24  
25  
26 *"It's quite a tricky, nebulous area [...]. The nature of general practice is that we're*  
27 *dealing every day with uncertainty..."* (Interview 6, Participant 3)  
28  
29

30  
31 A key concern of staff was that policymakers and those implementing cancer initiatives did  
32 not fully understand how risk was managed within primary care. Cancer was only one  
33 priority and there was an abundance of initiatives for a variety of conditions which primary  
34 care staff were expected to implement. Three underpinning organising themes (and  
35 associated basic themes) of 'complexity', 'continuity' and 'conflict' highlighted the tensions  
36 and difficulties that primary care face in managing the risk of early detection and referral for  
37 cancer symptoms whilst dealing with complex symptoms and care systems, patient-led  
38 factors and target-focused care. An overview of the organising and basic themes is presented  
39 in figure 1. These themes are described and discussed, contextualised by participant quotes  
40  
41  
42  
43  
44  
45  
46  
47  
48  
49 below.

50  
51  
52  
53 Complexity  
54  
55

1  
2  
3  
4  
5  
6  
7 This theme highlighted the complexity of managing risk in early cancer diagnosis because of  
8 external factors including cancer symptom differentiation and the restrictions imposed by  
9 referral criteria; the multitude of services and professionals involved in diagnostic and  
10 assessment services and the plethora of policies and initiatives targeted at primary care  
11 practice.  
12  
13  
14  
15

16  
17  
18 *Cancer disease and symptoms:* Cancer diagnosis was an important priority area in primary  
19 care but diagnosis presented complex challenges. Cancer was a rare diagnosis in primary  
20 care although symptoms associated with cancer were common.  
21  
22  
23

24  
25  
26 *“We get lots of sore throats, and yet we get one tonsillar cancer every three [years] so*  
27 *sorting out the wheat from the chaff is a real challenge.”* (Interview 3, Participant 3)  
28  
29

30  
31 These complexities of diagnosis were compounded by what were considered rigid referral  
32 criteria, based on disease prevalence amongst those with symptoms, which led to cases being  
33 ‘bounced back’ if they failed to meet diagnostic criteria. In attempts to manage what they  
34 considered was a risk to patients, some participants said, on occasion, they had to ‘fudge’,  
35 ‘embellish’ or ‘bend-the-rules’ to ensure assessment of patients for whom they had concerns:  
36  
37  
38  
39  
40  
41

42  
43 *“Even though it says on the form, “don't fill out this form unless they tick any boxes”*  
44 *but you find a box to tick, and usually for very good reason. And I think you'd only go-*  
45 *slightly over egging the presentation if you were pretty sure there was something*  
46 *there, something going on.”* (Interview 4, Participant 4)  
47  
48  
49  
50  
51  
52  
53  
54  
55  
56  
57  
58  
59  
60

1  
2  
3  
4  
5  
6  
7 *Fragmentation and access to diagnostic services:* Primary care staff expressed difficulties  
8 accessing diagnostic services due to on-going service re-configurations and the involvement  
9 of multiple agencies. This led to fragmentation in terms of staff not always knowing who, or  
10 to which services, referrals could be made.  
11  
12

13  
14  
15  
16 There were also some concerns about fragmented relationships between primary and  
17 secondary care with several participants feeling frustrated by restricted access to diagnostics  
18 for certain conditions. Some participants considered this was due to *'empire building'* by  
19 professionals justifying and *'preserving'* their service by retaining ownership of who was  
20 qualified to make referrals:  
21  
22  
23  
24  
25  
26  
27

28 *"I can send people for a CT scan if I have a concern about them, for some conditions,*  
29 *but not others. Well why not? I'm the one who's initiating the referral in the first*  
30 *place. You trust me to initiate the referral to pick the patient and prepare them so that*  
31 *you can come along and just arrange the scan and look at it."* (Interview 4,  
32  
33  
34  
35 Participant 3)  
36  
37  
38

39 Whilst some GPs wanted more direct access to diagnostics, this was not universal, and others  
40 highlighted the need for *'training'* prior to referrals being made.  
41  
42  
43  
44

45 *Guidelines content and information overload:* Participants referred to the usefulness of  
46 guidelines to help symptom differentiation and manage risk. Knowledge was felt to be  
47 experientially derived and referral guidelines only considered useful for less experienced  
48 doctors. Risk assessment tools were occasionally considered unnecessarily complex when  
49  
50  
51  
52  
53  
54  
55

1  
2  
3  
4  
5  
6 patients had 'red flag' symptoms and, as previously mentioned, sometimes restrictive for use  
7  
8 in primary care:  
9

10  
11  
12 *"I mean, you see, from a GPs point of view, if somebody comes in who is fifty-five*  
13 *years of age, and passes blood in his stool, you need to exclude a cancer. Now, I don't*  
14 *want to know how many percentage of those people pass blood in the motion will*  
15 *have cancer, or how many will have piles, or inflammatory bowel disease or what*  
16 *have you."* (Interview 4, Participant 3)  
17  
18  
19  
20  
21

22  
23  
24 Concerns were expressed about the number of guidelines available for different conditions  
25 and inconsistencies between different sources:  
26  
27

28  
29  
30 *"And that's the problem 'cause last year there was a big campaign, "if you have a*  
31 *cough for more than three weeks you need to go and see a doctor", but NICE*  
32 *guidelines is six weeks."* (Interview 6, Participant 4)  
33  
34  
35

36  
37 Participants described how the 'tsunami' of new guidelines, care plans and initiatives meant it  
38 was difficult to keep up-to-date:  
39  
40

41  
42  
43 *"And I thought 'that's probably a squamous cell carcinoma. That needs a two-week*  
44 *wait referral'. Then, I actually checked the guidelines, the guidelines say that "it's got*  
45 *to be over one centimetre and you've got to wait more than eight weeks really for it to*  
46 *grow" etcetera, etcetera [...] and those things will change on a regular basis. Now,*  
47 *how do you expect an entire network of primary care physicians to stay current with*  
48 *all those guidelines and apply them religiously?"* (Interview 2, Participant 3).  
49  
50  
51  
52  
53  
54



1  
2  
3  
4  
5  
6  
7  
8  
9  
10  
11  
12 Continuity

13  
14 Practice staff expressed concern that a lack of continuity increased the risk of missing  
15 diagnoses and/or supporting the patient through a difficult period. This was highlighted  
16 through discussions about relationships between patients and clinicians; delays in information  
17 sharing across the primary and secondary care interface and patient follow-up after initial  
18 consultation.  
19  
20  
21  
22  
23

24  
25  
26 *Patient-practice relationships:* Continuity-of-carer could not always be achieved in practice,  
27 even though it was felt that patients preferred it and its absence was thought to possibly  
28 contribute to diagnostic delay:  
29  
30  
31

32  
33  
34 *“People have been hopping around from one clinician to another and that, and you*  
35 *don't see the evolution of the story until it hits you in the face. Patients book on the*  
36 *day, they don't necessarily get in the person they normally see, they get in with the*  
37 *available, so that can disjoint things.” (Interview 3, Participant 4)*  
38  
39  
40  
41  
42

43 Staff felt that smaller, rural practices had closer relationships with their patients and their  
44 community, which would lead to earlier consultation. However, others felt awareness of  
45 cancer deaths was heightened in close-knit communities, which could reinforce negative  
46 views towards cancer and cancer survivorship amongst the local population and delay access  
47 to services.  
48  
49  
50  
51  
52

1  
2  
3  
4  
5  
6  
7 *Primary care and secondary care interface:* Expedited assessment following GP referral of  
8 patients through the two-week wait initiative was perceived to work well by practice staff,  
9 but delays further on in the assessment process, and outside of primary care control, were felt  
10 to put patients at risk again and exacerbated their concerns:  
11  
12

13  
14  
15  
16 *“And, well, it's very difficult from our point of view, ‘cause we're saying, “look, you*  
17 *know this may be nothing serious, however, I want to refer you on the system, you'll*  
18 *get an appointment in two weeks”, and they do get seen, but then there's a massive*  
19 *delay, so, you know, then they're kinda all heightened up because they're thinking,*  
20 *“{whispered} the doctor thinks I've got cancer” and then nothing happens for ages,*  
21 *and it's really hard for the patients.” (Interview 3, Participant 5)*  
22  
23  
24  
25  
26  
27

28  
29  
30 *Practice-based follow-up:* Patients themselves were also considered to cause delays if they  
31 failed to attend. Practices debated the extent to which they should chase these patients up and  
32 the risks if they did not:  
33  
34

35  
36  
37 *“In the back of their mind they know they should, but if they face the fact that they're*  
38 *going back, are they are going to be faced with something else? You also have to be*  
39 *responsible for the fact that if that doesn't stop, you must persist, and accept the fact*  
40 *that, if you don't, then you could, somewhere down the line end up with something so*  
41 *serious that it's only going to be palliative.” (Interview 2, Participant 1)*  
42  
43  
44  
45  
46  
47

48  
49 Conflict  
50  
51  
52  
53  
54  
55

1  
2  
3  
4  
5  
6  
7 Within this theme, managing risk was related to primary care focus on targets; conflicting  
8 opinions about the role of non-clinical staff and about the worries and tensions generated by  
9 cancer awareness campaigns.  
10  
11

12  
13  
14 *Prevention versus target driven care:* ~~It is recognised that primary care can make a significant~~  
15 ~~contribution to public health through promotion, in the practice population, of healthier~~  
16 ~~lifestyles and earlier presentation of symptoms of diseases, where early intervention reduces~~  
17 ~~morbidity and mortality, such as cancer.~~ Primary care staff considered cancer a public health  
18 priority but some felt that there was a tension between adopting preventative approaches in  
19 the practice such as promoting cancer awareness and early presentation and the way that  
20 primary care is currently funded through achieving specific targets mainly relating to the  
21 management of long-term conditions (Quality and Outcomes Framework):  
22  
23  
24  
25  
26  
27  
28  
29

30  
31  
32 *“We’re not as good with public health, with local public health initiatives, as maybe*  
33 *we should be necessarily. It’s just time to do things, and those things aren’t required*  
34 *of our core business, and when you have a very detailed contract that tells you what*  
35 *you will be paid for doing—.”* -(Interview 2, Participant 3)  
36  
37  
38  
39

40  
41 *Staff roles:* There were conflicting views around the role of other practice staff in managing  
42 the risk of cancer detection and awareness, in particular with regard to reception staff. Some  
43 staff viewed the reception role as a health advisor, whereas others perceived their role to be  
44 purely administrative. Additionally, there were reservations about the ability of reception  
45 staff to relay cancer messages and how the public might feel about receiving health  
46 information from them:  
47  
48  
49  
50  
51  
52  
53  
54  
55  
56  
57  
58  
59  
60

1  
2  
3  
4  
5  
6  
7  
8  
9  
10  
11  
12  
13  
14  
15  
16  
17  
18  
19  
20  
21  
22  
23  
24  
25  
26  
27  
28  
29  
30  
31  
32  
33  
34  
35  
36  
37  
38  
39  
40  
41  
42  
43  
44  
45  
46  
47  
48  
49  
50  
51  
52  
53  
54  
55  
56  
57  
58  
59  
60

*“You’re passing clinical responsibility to people who are non-clinical. It’s alright for patients to speak to them, and that’s fine, but, I’m not gonna use the receptionists as a source of information [...]. I think anything clinical should be passed to the doctor full stop. I don’t think there is any other role for the receptionist.”* (Interview 4, Participant 3)

There were also concerns about potential litigation issues if reception staff were to give advice and how this could impact on the practice:

*“I think it’s also worth mentioning at this point, because of our roles, how they are, we get a lot of patients not happy about us supplying information, because we’re not allowed to diagnose, obviously for obvious reasons, but if you was to imply something, that could come back on us twice as hard because you’d implied something that could be wrong, and therefore it is now your fault.”* (Interview 1, Participant 1)

A further issue associated with staff roles in helping to manage risk was the identified benefits of having a chain of communication between all practice members. For example, receptionists being able to ‘raise issues’ with the doctor if they know someone is coming in who has symptoms the doctor should be aware of but the patient ‘may not say anything’. This can also work the other way:

*“Patients that I worry about, I will leave messages. I’ll mention to reception or mention to people that I want to follow them up.”* (Interview 6, Participant 3)

1  
2  
3  
4  
5  
6  
7 Others felt that the focus on the long-term conditions might provide opportunities for practice  
8 nurses to be more involved as they were often seeing patients who might be at higher risk of  
9 cancer because of their age, disease condition or lifestyle behaviours:  
10  
11

12  
13  
14 *“Chronic disease, yeah, so diabetic, high blood pressure, chronic kidney disease,*  
15 *asthma, most patients will come and see the practice nurses for routine bloods, blood*  
16 *pressure, weight, everything like that. So often, GPs don't always see them, I mean*  
17 *they do the medication reviews, but, we flag to them anything that we're worried*  
18 *about.”* (Interview 2, Participant 4)  
19  
20  
21  
22  
23  
24  
25

26 Some could also see a role for members of the wider practice team:  
27  
28

29  
30 *“We'd say 'well who are the district nurses already going out to?' You know, you can*  
31 *work with your local pharmacists.”* (Interview 2, Participant 2)  
32  
33  
34

35 *Cancer awareness:* Although cancer fear was commonly acknowledged, staff were divided as  
36 to whether patients were afraid to consult the GP with cancer symptoms. Some felt that  
37 unhealthy lifestyle choices contributed to patient reluctance to present with cancer symptoms:  
38  
39  
40  
41

42  
43 *“The cancers where they feel that they may have contributed to it, like smoking, they*  
44 *tend to ignore because they don't want to be told that it may be their fault in a certain*  
45 *way, and they don't want to give up the lifestyle.”* (Interview 6, Participant 4)  
46  
47  
48  
49  
50

51 Cancer awareness campaigns were felt to be important, even though those who presented to  
52 the practice following the campaign were more likely to be those at least risk:  
53  
54  
55

1  
2  
3  
4  
5  
6  
7  
8  
9  
10  
11  
12  
13  
14  
15  
16  
17  
18  
19  
20  
21  
22  
23  
24  
25  
26  
27  
28  
29  
30  
31  
32  
33  
34  
35  
36  
37  
38  
39  
40  
41  
42  
43  
44  
45  
46  
47  
48  
49  
50  
51  
52  
53  
54  
55  
56  
57  
58  
59  
60

*“It’s the people who never come to the doctors that you want to hit, not the people that were already coming in anyway, and they tend to be ones that see those adverts. But then if you can get one person who wouldn’t normally come in and you catch them, then it’s better.” (Interview 5, Participant 1)*

Campaigns were also felt to create extra work for all practice members. There were complaints that cancer awareness campaigns tend to run without consideration of other local or national campaigns which may be running simultaneously which increased the risk that practice capacity to safely respond to patients was compromised:

*“It’s like it’s alright saying putting in place to get them in, but it’s the sheer volume, isn’t it? You can only cope with so much can’t you?” (Interview 5, Participant 1)*

## DISCUSSION

This study provides insights into the experiences of primary care staff who manage patients with symptoms ~~suggestive of~~ associated with cancer. The overarching theme ~~that~~ emerged was the need to manage risk so that cancer patients had a timely diagnosis and were assessed appropriately. The associated subthemes of complexity, continuity and conflict highlighted the tensions and difficulties faced by staff when attempting to manage these risks in modern practice.

1  
2  
3  
4  
5  
6  
7 The study was small, descriptive and exploratory. However, it covered a diverse geographical  
8 area and included practices with varying levels of engagement with awareness and early  
9 diagnosis initiatives. We undertook stratified sampling of the practices based on the level of  
10 on engagement to ensure we had a balance of perspectives so as to better inform  
11 policymakers of the possible barriers and drivers to the uptake of initiatives. The stratification  
12 was based on known engagement with at the range of national and regional initiatives to  
13 promote earlier presentation, detection and referral of patients with symptoms suggestive of  
14 cancer available to the practices at that time.

15  
16  
17  
18  
19  
20  
21  
22  
23  
24 The findings of our study suggest that national initiatives did not appear to wholly resolve  
25 issues in-around managing risk for all practitioners. Rather, in some cases, these initiatives  
26 were felt to introduce inherent risks which staff had to find ways to overcome. eFor  
27 example, national cancer awareness campaigns This included cancer awareness campaigns.  
28 However, these campaigns which, while felt were felt to be very important to encourage  
29 patients who would otherwise delay diagnosis. However, as these also campaigns appeared  
30 to increase consultation rates from those at lesser risk, this was perceived to placed. This  
31 placed additional burden on the practice.

32  
33  
34  
35  
36  
37  
38  
39  
40  
41 There were-were also concerns amongst our participants about practice-based initiatives  
42 introduced to directly support practices. The International Cancer Benchmarking Partnership  
43 has observed lower survival rates in Denmark and the UK compared to other countries in  
44 their study, which has and raised concerns about the role of primary care gatekeeping in  
45 delayed diagnosis. [2] This observation appears to be supported by a wider study of  
46 European countries which also demonstrated lower cancer survival in those with primary care  
47 based gatekeeper systems. [18] Primary care gatekeeping may reduce the burden on specialist

care but may also contribute to diagnostic delay through the restriction of access to these services. In the UK, national referral guidelines and the two-week waiting-time initiative should help alleviate this problem for those with symptoms associated with cancer.

Participants in our study considered ~~highlighted that~~ timely diagnosis was as an essential part of their role in cancer care. ~~This An Australian study had a similar finding was A finding reported in an Australian study, [16], but highlighted that who~~ This study also identified that ~~the~~ resources spent gaining timely access to specialist opinion were a major issue for their practitioners. In our study this was universally ~~appeared to be considered~~ less of a problem because of the two-week waiting-time initiative. ~~This initiative was universally embraced by participants as it was felt to work well in facilitating timely assessment. However, but there were still~~ concerns were expressed that lack of direct access to diagnostic investigations and poor communication between primary and secondary care put patients at risk due to of extended delays. Similar concerns were as reported in a study undertaken in Ireland.[3]

Some participants in our study felt that the referral criteria for the two-week waiting-time initiative were too restrictive. ~~This might, and this, lead~~ to practitioners, on occasion, subverting the referral system to ensure that patients they considered were at risk, but who did not fit the referral criteria, could be assessed in a timely manner. Such concerns are not unfounded; one study has shown that 8% of patients felt by GPs to have cancer, but who did not have symptoms which fit referral criteria for cancer, were subsequently diagnosed with cancer ~~cancer patients do not have symptoms which fit referral criteria.~~[189] This may be because the presenting signs and symptoms had a lower predictive value for cancer than those included in the guidelines. Nevertheless, there is high compliance with guidelines and some limited evidence that referral guidelines contribute, in part, to diagnostic delay reduction.[6, 189]



1  
2  
3  
4  
5  
6  
7 Diagnostic errors leading to primary care malpractice claims are common.[1920] Researchers  
8 suggest that although GPs are more likely to correctly diagnose patients with cancer than  
9  
10 miss cases, there are a disproportionate number of deaths amongst the latter.[201,-2224]  
11  
12 Diagnostic complexity is compounded by the frequency of consultations for symptoms  
13  
14 associated with cancer,-[212, 223] a fear highlighted by practitioners in this study. A study in  
15  
16 Norway, which followed up patients presenting with cancer warning signs to their GP,  
17  
18 suggests that patients with cancer may be missed if multiple warning signs and symptoms are  
19  
20 not considered.[242] Retrospective studies of practice-based data have identified  
21  
22 combinations of warning signs and symptoms which may be associated with increasing ~~the~~  
23  
24 likelihood of cancer.[234-245] These have been used to inform risk assessment tools to aid  
25  
26 decision-making, with algorithms and probabilities of risk based on demographic  
27  
28 characteristics, lifestyle factors, symptoms and/or attendance frequency.[11] Some have been  
29  
30 disseminated nationally, and there is evidence from both quantitative and qualitative studies  
31  
32 that they affect GPs' decisions to refer.[11] However, in our study, some participants had  
33  
34 similar concerns about these tools as they did [about](#) guidelines. A recent analysis of  
35  
36 significant event audits in lung cancer highlighted how cancer can mimic other diagnoses and  
37  
38 have atypical presentation.[7] Guidelines and risk assessment tools are analytical tools, and  
39  
40 although statistical probabilities are based on uncertainty, [some participants in our study felt](#)  
41  
42 [they may be perceived to-they may](#) introduce a level of certainty which fails to encapsulate  
43  
44 practitioners' tacit concerns about patients. Previous work in primary care decision-making  
45  
46 has emphasised the analytical over the experiential, but recent research , including [in](#) cancer  
47  
48 diagnosis, suggests that experiential knowledge may have a role and may be more responsive  
49  
50 to ~~individual-the~~ patient [as a person](#). [15, 256-287] Others have found that better diagnostic  
51  
52 decisions [about urgent referrals](#) appear to be made by older doctors\_- [223] and, as commented  
53  
54  
55  
56  
57  
58  
59  
60

1  
2  
3  
4  
5  
6  
7 on by some of our participants, that guidelines and risk assessment tools may be more useful  
8  
9 | for newer practitioners who have yet to develop problem solving strategies.[289]

10  
11  
12 It has also been observed that, unlike in acute care, decision-making in primary care partly  
13  
14 | involves an understanding of the patient context and perspective.[2930] Our study  
15  
16 | participants highlighted concerns that lack of continuity of carer may lead to diagnostic  
17  
18 | delays. Relational continuity was felt to be a particular problem in larger practices and urban  
19  
20 | settings. Other studies suggest that fragmentation of primary care and shorter consultation  
21  
22 | times has led to a lack of continuity-of-care or carer, which may hinder early diagnosis as  
23  
24 | cancer presentation can be complex in those with multiple co-morbidities.[16, 301, 312] In a  
25  
26 | qualitative study of lung cancer patients in New Zealand, patients felt that not always seeing  
27  
28 | the same GP could lead to delays in diagnosis due to poor follow up.[323] In a study in  
29  
30 | Denmark, the -authors suggest that perceived lack of accessibility and the doctor-patient  
31  
32 | relationship were associated with patient delay in seeking advice about cancer  
33  
34 | symptoms.[334] Others have found that confidence and trust in a doctor were more  
35  
36 | important predictors of cancer detection than ease of access and choice of preferred  
37  
38 | doctor.[345]

39  
40  
41 In our study, participants highlighted how other practice team members, such as nurses who  
42  
43 | are in more regular contact with patients with long-term conditions, could raise symptom  
44  
45 | awareness or be more alert to changes in, or new, symptoms suggestive of cancer. In the US  
46  
47 | and Canada, patient navigators are being used to support patients through the complex  
48  
49 | systems found in cancer management and care.[36] It has also been suggested that these  
50  
51 | roles could be extended to support patients during the diagnostic, referral and assessment  
52  
53 | processes and ensure appropriate follow up of investigative resultsons.[357] In our study,  
54  
55

1  
2  
3  
4  
5  
6  
7 some staff felt that receptionists could act as navigators in terms of directing patients with  
8 symptoms to see the GP.[36] Low levels of knowledge about some cancer symptoms has  
9 been demonstrated in non-medical staff.[378] However, our study highlighted that  
10 professional boundaries and concerns about litigation-which might also impede such  
11 initiatives. Disclosures or discussions of diagnostic issues within a public reception  
12 location also raised ethical concerns. Research within primary care suggests that facilitation  
13 of communities of practice and interdisciplinary knowledge sharing may help to identify the  
14 role of other practice team members in promoting earlier cancer presentation and  
15 diagnosis;[398] although training needs should be addressed.[387]

16  
17  
18  
19  
20  
21  
22  
23  
24  
25  
26 This study has highlighted that a 'one-size-fits-all' approach to implementing initiatives is  
27 unlikely to succeed as practitioners expressed a range of views and opinions on the benefits  
28 of different initiatives. Lack of implementation of initiatives in primary care is not always  
29 because of resistance to the initiatives themselves, but sometimes because of the sheer  
30 number across a range of priority areas that practices are expected to implement, often  
31 simultaneously. Policymakers should consider more carefully how these impact on primary  
32 care, how they can be embedded into practice systems and emphasise and exploit synergies  
33 with other disease conditions.

34  
35  
36  
37  
38  
39  
40  
41  
42  
43 For there to be greater success of initiatives aimed at promoting earlier presentation, detection  
44 and referral in primary care, there needs to be further work on understanding how primary  
45 care manage risk in the face of inherent uncertainty, organisational changes and competing  
46 priorities.

1  
2  
3  
4  
5  
6  
7 **ACKNOWLEDGEMENTS:** Our thanks to the practices who participated in this study and  
8 to the staff of the Lancashire and South Cumbria Cancer Network who assisted us.  
9

10  
11  
12 **COMPETING INTERESTS:** PD was public health lead for LSCCN and NC is part-funded  
13 by a grant from LSCCN; PD was also funded by LSCCN to undertake evaluative work.  
14  
15

16  
17  
18 **FUNDING:** This work was supported by Lancashire and South Cumbria Cancer Network  
19 (LSCCN) as part of the National Cancer Awareness and Early Detection initiative (NAEDI)  
20 funding 'cancer networks supporting primary care'.  
21  
22  
23

#### 24 25 **CONTRIBUTIONS:**

26  
27 NC recruited participants, carried out interviews, transcribed the interviews, coded the  
28 transcripts, contributed to the development of the coding framework, and contributed to the  
29 writing of the manuscript.  
30  
31

32  
33 GT carried out interviews, coded the transcripts, contributed to the development of the coding  
34 framework and contributed to the writing of the manuscript.  
35  
36

37  
38 PD designed the study, collated practice engagement data, contributed to the development of  
39 the coding of the framework and contributed to the writing of the manuscript.  
40  
41

42  
43 **DATA SHARING:** No further data are available  
44  
45

#### 46 **REFERENCES**

- 47  
48  
49 1. Haward R. The Calman-Hine report: a personal retrospective on the UK's first  
50 comprehensive policy on cancer services. *The Lancet Oncology*. 2006;7(4):336-46.  
51  
52  
53  
54

2. Coleman MP, Foreman D, Bryant H, et al. Cancer survival in Australia, Canada, Denmark, Norway, Sweden, and the UK, 1995—2007 (the International Cancer Benchmarking Partnership): an analysis of population-based cancer registry data. *The Lancet*. 2011;377:127–38. doi:10.1016/S0140-6736(10)62231-3.
3. Daly H, Collins C. Barriers to early diagnosis of cancer in primary care: a needs assessment of GPs. *Ir Med J*. 2007; 100(10):624-26
4. Ingebrigsten SG, Scheel BI, Hart B, et al. Frequency of 'warning signs of cancer' in Norwegian general practice, with prospective recording of subsequent cancer. *Fam Pract*. 2013;30:153-160
5. National Institute for Clinical Excellence. Clinical Guideline 27. Referral guidelines for suspected cancer. 2005.  
<http://www.nice.org.uk/nicemedia/live/10968/29814/29814.pdf> accessed 3/1/2014.
6. Neal RD, Din NU, Hamilton W, et al. Comparison of cancer diagnostic intervals before and after implementation of NICE guidelines: analysis of data from the UK General Practice Research Database. *Br J Cancer*. 2014;110(3):584-92.  
doi:10.1038/bjc.2013.791. 4.
7. Mitchell ED, Rubin G, MacLeod U. Understanding diagnosis of lung cancer in primary care: qualitative synthesis of significant event audit reports. *Br J Gen Pract*. 2013;63(606):e37-46. doi:10.3399/bjgp13X660760.
8. Royal College of General Practitioners. Clinical Innovation and Research Centre. National Audit of Cancer Diagnosis in Primary Care. 2011.  
[http://www.rcgp.org.uk/news/2011/november/~/\\_media/Files/News/National\\_Audit\\_of\\_Cancer\\_Diagnosis\\_in\\_Primary-Care.ashx](http://www.rcgp.org.uk/news/2011/november/~/_media/Files/News/National_Audit_of_Cancer_Diagnosis_in_Primary-Care.ashx). accessed 03/01/2014.

Field Code Changed

- 1  
2  
3  
4  
5  
6  
7 9. Meechan D, Gildea C, Hollingworth L, et al. Variation in use of the 2-week referral  
8 pathway for suspected cancer: A cross-sectional analysis. *Br J Gen Pract.* 2012;  
9 62(602):e590–97. doi:10.3399/bjgp12X654551.  
10  
11  
12 10. Elliss-Brookes L, McPhail S, Ives A, et al. Routes to diagnosis for cancer -  
13 determining the patient journey using multiple routine data sets. *Br J Cancer.*  
14 2012;107(8):1220-26. doi:10.1038/bjc.2012.408.  
15  
16  
17 11. Hamilton W, Green T, Martins T et al. Evaluation of risk assessment tools for  
18 suspected cancer in general practice: a cohort study. *Br J Gen Pract.*  
19 2013;63(606):e30-36. doi:10.3399/bjgp13X660751.  
20  
21  
22 12. Emery JD, Walter FM, Gray V, et al. Diagnosing cancer in the bush: a mixed-methods  
23 study of symptom appraisal and help-seeking behaviour in people with cancer from  
24 rural Western Australia. *Fam Pract.* 2013 Jun;30(3):294-301.doi:  
25 10.1093/fampra/cms087  
26  
27  
28 13. Pedersen AF, Hansen RP, Vedsted P. Patient delay in colorectal cancer patients:  
29 associations with rectal bleeding and thoughts about cancer. *PLoS One.* 2013:Jul  
30 22;8(7):e69700.doi: 10.1371/journal.pone.0069700  
31  
32  
33 14. Marlow LA, McGregor LM, Nazroo JY, et al. Facilitators and barriers to help-seeking  
34 for breast and cervical cancer symptoms: a qualitative study with an ethnically diverse  
35 sample in London. *Psychooncology.* 2013;Dec 19.doi:10.1002/pon.3464  
36  
37  
38 15. Johansen ML, Holtedahl KA, Rudebeck CE. How does the thought of cancer arise in a  
39 general practice consultation? Interviews with GPs. *Scand J Prim Health Care.*  
40 2012;30(3):135-40. doi:10.3109/02813432.2012.688701.  
41  
42  
43 16. Mitchell GK, BurrIDGE LH, Colquist SP, et al. General Practitioners' perceptions of  
44 their role in cancer care and factors which influence this role. *Health Soc Care*  
45 *Community.* 2012; 20(6):607-16. doi:10.1111/j.1365-2524.2012.01075.x  
46  
47  
48  
49  
50  
51  
52  
53  
54  
55  
56  
57  
58  
59  
60

- 1  
2  
3  
4  
5  
6  
7 17. Attride-Stirling J. Thematic networks: an analytic tool for qualitative research.  
8  
9 *Qualitative Research*. 2001;1(3):385-405. doi:10.1177/146879410100100307.
- 10 18. Vedsted P and Olesen F. Are the serious problems in cancer survival partly rooted in  
11 gatekeeper principles? An ecologic study. *Br J Gen Pract*.  
12 [2011;DOI:10.3399/bjgp11X588484](https://doi.org/10.3399/bjgp11X588484).  
13  
14  
15
- 16 19. Baughan P, Keatings J, O'Neill B. Urgent suspected cancer referrals from general  
17 practice: audit of compliance with guidelines and referral outcomes. *Br J Gen Pract*.  
18 2011; doi:10.3399/bjgp11X606591.  
19  
20  
21
- 22 20. Wallace E, Lowry J, Smith SM, et al. The epidemiology of malpractice claims in  
23 primary care: a systematic review. *BMJ Open*. 2013;3:e002929.  
24  
25  
26  
27  
28 21. Balla J, Heneghan C, Thompson M, et al. Clinical decision making in a high risk  
29 primary care environment: a qualitative study in the UK. *BMJ Open*. 2012;2:e000414.  
30  
31  
32  
33  
34 21. Wallis K, Dovey S. No fault compensation for treatment injury in New Zealand:  
35 identifying threats to patient safety in primary care. *BMJ Quality Safety*.  
36  
37  
38  
39  
40 22. Scheel BI, Ingebrigsten SG, Thorsen T, et al. Cancer suspicion in general practice: the  
41 role of symptoms and patient characteristics, and their association with subsequent  
42 cancer. *Br J Gen Pract*. 2013;doi:10.3399/bjgp13X671614  
43  
44
- 45 23. Jiwa M, Gordon M, Arnet H, et al. Referring patients to specialists: a structured  
46 vignette survey of Australian and British GPs. *BMC Fam Pract*. 2008; 9:2.doi:  
47  
48  
49  
50  
51 24. Emery J. Editorial: Assessment of cancer risk in men and women. *Br J Gen Pract*.  
52  
53  
54  
55  
56  
57  
58  
59  
60

Field Code Changed

- 1  
2  
3  
4  
5  
6  
7 25. Hamilton W. The CAPER studies: five case-control studies aimed at identifying and  
8 quantifying the risk of cancer in symptomatic primary care patients. *Br J*  
9 *Cancer*.2009;101: S80-S86 doi:10.1038/sj.bjc.6605396  
10  
11  
12 26. André M, Andén A, Borgquist L, et al. GPs' decision-making-perceiving the patient as  
13 a person or a disease. *BMC Fam Pract*. 2012;13:38. doi:10.1186/1471-2296-13-38.  
14  
15  
16 27. Stolper E, Van de Wiel M, Van Royen P, et al. Gut feelings as a third track in general  
17 practitioners' diagnostic reasoning. *J Gen Intern Med*. 2011;26(2):197-203.  
18  
19  
20  
21  
22 28. Zwolsman S, te Pas E, Hooft L, et al. Barriers to GPs' use of evidence-based medicine:  
23 a systematic review. *Br J Gen Pract*. 2012;62(600):e511-21. doi:  
24  
25  
26  
27 10.3399/bjgp12X652382.  
28  
29  
30 29. Salah A, Hassan A. Cognitive schemes and strategies in diagnostic and therapeutic  
31 decision making: a primer for trainees. *Perspect Med Educ*. 2013; 2:321-31.  
32  
33  
34 30. O'Riordan M, Dahinden A, Aktürk Z, et al. Dealing with uncertainty in general  
35 practice: an essential skill for the general practitioner. *Qual Prim Care*. 2011;19:175-  
36  
37  
38  
39 81.  
40  
41 31. Brindle L, Pope C, Corner J, et al. Eliciting symptoms interpreted as normal by  
42 patients with early lung cancer. *BMJ Open*. 2012;2:e001977. doi:10.1136/bmjopen-  
43  
44  
45 2012-001977.  
46  
47 32. Round T, Steed L, Shankleman J, et al. Primary care delays in diagnosing cancer: what  
48 is causing them and what can we do about them? *J R Soc Med*. 2013;106(11):437-40.  
49  
50  
51  
52  
53  
54  
55  
56  
57  
58  
59  
60



- 1  
2  
3  
4  
5  
6  
7 33. Walton L, McNeill R, Stevens W, et al. Patient perceptions of barriers to the early  
8 diagnosis of lung cancer and advice for health service improvement. *Fam Pract.*  
9 2013;30:439-44 doi:10.1093/fampra/cmt001  
10  
11  
12 34. Hansen RP, Vedsted P, Sokolowsk I, et al. General practitioner characteristics and  
13 delay in cancer diagnosis: a population-based cohort study. *BMC Fam Pract.* 2011;  
14 12:100  
15  
16  
17 35. Rogers S, Gildea C, Meechan D, et al. Access, continuity of care and consultation  
18 quality: which best predicts urgent cancer referrals from general practice? *J Public*  
19 *Health (Oxf).* 2014 Jan 23. [Epub ahead of print]  
20  
21  
22 36. Dohan D, Schrag D. Using navigators to improve care of underserved patients.  
23 *Cancer.* 2005;104:848-55. doi:10.1002/cncr.21214.  
24  
25  
26 37. Lee J-H, Fulp W, Wells KJ, et al. Effect of patient navigation on time to diagnostic  
27 resolution among patients with colorectal cancer-related abnormalities. *J Canc Educ.*  
28 2014;29:144-50  
29  
30  
31 38. Cook N, Hart A, Nuttall K, et al. A telephone survey of cancer awareness among  
32 frontline staff: informing training needs. *Br J Cancer.* 2011;105(3):340-45.  
33 doi:10.1038/bjc.  
34  
35  
36 39. Kislov R, Walshe K, Harvey G. Managing boundaries in primary care service  
37 improvement: a developmental approach to communities of practice. *Implement Sci.*  
38 2012;7:97. doi:10.1186/1748-5908-7-97.  
39  
40  
41  
42  
43  
44  
45  
46  
47  
48  
49  
50  
51  
52  
53  
54  
55  
56  
57  
58  
59  
60

1  
2  
3  
4  
5  
6  
7  
8  
9  
10  
11  
12  
13  
14  
15  
16  
17  
18  
19  
20  
21  
22  
23  
24  
25  
26  
27  
28  
29  
30  
31  
32  
33  
34  
35  
36  
37  
38  
39  
40  
41  
42  
43  
44  
45  
46  
47  
48  
49  
50  
51  
52  
53  
54  
55  
56  
57  
58  
59  
60

**Figure 1: organising themes of complexity, continuity and conflict with their associated basic themes, centred around the global theme of managing risk in primary care**

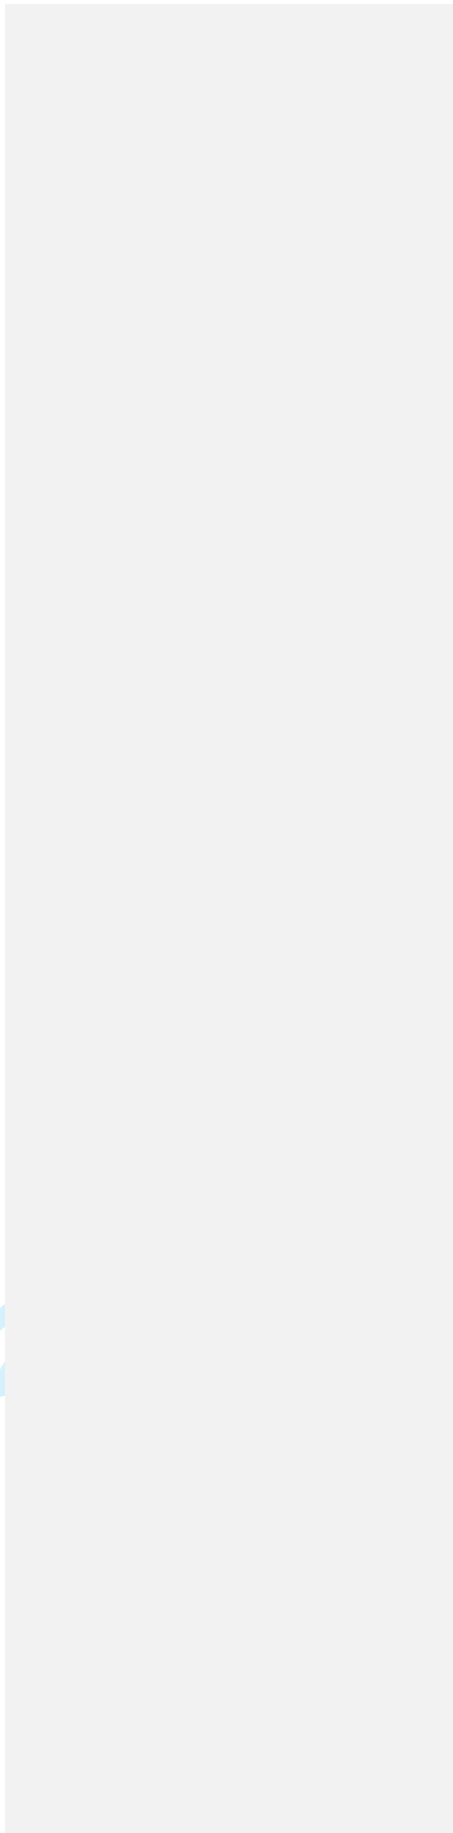

## Box 1: Semi-structured interview schedule

- Why do you think people with symptoms suggestive of cancer do not present, get seen or diagnosed or referred earlier?
- What do you know about the initiatives that concern the earlier presentation, diagnosis and referral of cancer symptoms?
  - Prompts around specific tools/initiatives/referral criteria
- Have you accessed any local training events concerning the identification, referral of cancer patients?
  - Prompts around specific training attended, and how learning is usually undertaken
- Overall, what is working well in terms of the implementation and use of these initiatives?
- Overall, have you experienced any/or what do you consider to be the main barriers in the implementation/access/use of these various initiatives?
- Are there any practice based issues that may affect the early identification and referral for cancer patients?
  - Prompts around staff and practice issues, communication, administration
- Overall, what do you think local practices could do to help promote and diagnose cancer symptoms?
  - Prompts around team roles and other practice issues
- Do you know about the Lancashire and South Cumbria Cancer Network and what their role is?
  - Prompts around extent of engagement, attitudes and areas for improvement
- What is your opinion concerning the forthcoming ‘access to diagnostics’ initiative (initiative for practices to make direct referrals to diagnostics such as x-rays, CT scans, ultrasound)?
  - Prompts around who should make the referral
- Are there any additional support mechanisms/external to the practice that need to be in place to help with promotion/diagnosis and referral?
- Any further issues or concerns you would like to raise about this work?

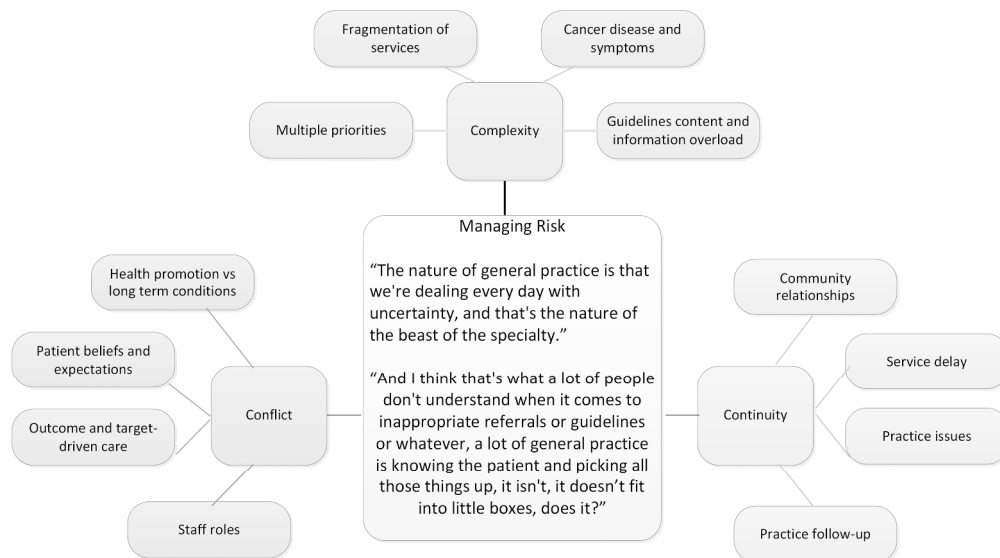

Figure 1: organising themes of complexity, continuity and conflict with their associated basic themes, centred around the global theme of managing risk in primary care  
233x130mm (300 x 300 DPI)

review only

1  
2  
3  
4  
5  
6  
7  
8  
9  
10  
11  
12  
13  
14  
15  
16  
17  
18  
19  
20  
21  
22  
23  
24  
25  
26  
27  
28  
29  
30  
31  
32  
33  
34  
35  
36  
37  
38  
39  
40  
41  
42  
43  
44  
45  
46  
47  
48  
49  
50  
51  
52  
53  
54  
55  
56  
57  
58  
59  
60
